# Supplementary material for: In Silico Identification of Novel Immunogenic Secreted Proteins of Mycoplasma bovis from Secretome Data and Experimental Verification
Source: PubMed Central journal article supplement (PMC7559824; doi:10.3390/pathogens9090770), 2020-09-21
Supplement: pathogens-09-00770-s001.pdf [file pathogens-09-00770-s001.pdf]

**Table S1:** Subcellular localization of *M. bovis* proteins predicted by using BUSCA server.

| No | Protein ID               | Accession No | GO ids     | GO terms              | Score |
|----|--------------------------|--------------|------------|-----------------------|-------|
| 1  | Mbov_0001 <sup>a</sup>   | AFM51379.1   | GO:0005737 | C:cytoplasm           | 0.7   |
| 2  | Mbov_0002 <sup>a,b</sup> | AFM51380.1   | GO:0005737 | C:cytoplasm           | 0.7   |
| 3  | Mbov_0003 <sup>a</sup>   | AFM51381.1   | GO:0005737 | C:cytoplasm           | 0.7   |
| 4  | Mbov_0004 <sup>a,b</sup> | AFM51382.1   | GO:0005737 | C:cytoplasm           | 0.7   |
| 5  | Mbov_0006 <sup>a,b</sup> | AFM51384.1   | GO:0005737 | C:cytoplasm           | 0.7   |
| 6  | Mbov_0007 <sup>a,b</sup> | AFM51385.1   | GO:0005737 | C:cytoplasm           | 0.7   |
| 7  | Mbov_0008 <sup>a,b</sup> | AFM51386.1   | GO:0005737 | C:cytoplasm           | 0.7   |
| 8  | Mbov_0009 <sup>a,b</sup> | AFM51387.1   | GO:0005737 | C:cytoplasm           | 0.7   |
| 9  | Mbov_0010 <sup>a,b</sup> | AFM51388.1   | GO:0005737 | C:cytoplasm           | 0.7   |
| 10 | Mbov_0011 <sup>a,b</sup> | AFM51389.1   | GO:0005737 | C:cytoplasm           | 0.7   |
| 11 | Mbov_0012 <sup>a,b</sup> | AFM51390.1   | GO:0005737 | C:cytoplasm           | 0.7   |
| 12 | Mbov_0016 <sup>a,b</sup> | AFM51394.1   | GO:0005615 | C:extracellular space | 0.92  |
| 13 | Mbov_0018 <sup>a,b</sup> | AFM51396.1   | GO:0005737 | C:cytoplasm           | 0.7   |
| 14 | Mbov_0022 <sup>a,b</sup> | AFM51400.1   | GO:0005737 | C:cytoplasm           | 0.7   |
| 15 | Mbov_0023 <sup>a,b</sup> | AFM51401.1   | GO:0005737 | C:cytoplasm           | 0.7   |
| 16 | Mbov_0025 <sup>a,b</sup> | AFM51403.1   | GO:0005737 | C:cytoplasm           | 0.7   |
| 17 | Mbov_0026 <sup>a,b</sup> | AFM51404.1   | GO:0005737 | C:cytoplasm           | 0.7   |
| 18 | Mbov_0027 <sup>a</sup>   | AFM51405.1   | GO:0005737 | C:cytoplasm           | 0.7   |
| 19 | Mbov_0037 <sup>a,b</sup> | AFM51415.2   | GO:0005615 | C:extracellular space | 0.87  |
| 20 | Mbov_0038 <sup>a,b</sup> | AFM51416.1   | GO:0005615 | C:extracellular space | 0.73  |
| 21 | Mbov_0044 <sup>a</sup>   | AFM51419.1   | GO:0005737 | C:cytoplasm           | 0.7   |
| 22 | Mbov_0048 <sup>a,b</sup> | AFM51423.1   | GO:0005737 | C:cytoplasm           | 0.7   |
| 23 | Mbov_0049 <sup>a,b</sup> | AFM51424.1   | GO:0005615 | C:extracellular space | 0.88  |
| 24 | Mbov_0051 <sup>a,b</sup> | AFM51426.1   | GO:0005737 | C:cytoplasm           | 0.7   |
| 25 | Mbov_0052 <sup>a,b</sup> | AFM51427.1   | GO:0005737 | C:cytoplasm           | 0.7   |
| 26 | Mbov_0056 <sup>a,b</sup> | AFM51431.1   | GO:0005737 | C:cytoplasm           | 0.7   |
| 27 | Mbov_0058 <sup>a</sup>   | AFM51433.1   | GO:0005737 | C:cytoplasm           | 0.7   |
| 28 | Mbov_0059 <sup>a,b</sup> | AFM51434.1   | GO:0005737 | C:cytoplasm           | 0.7   |
| 29 | Mbov_0062 <sup>a,b</sup> | AFM51437.1   | GO:0005737 | C:cytoplasm           | 0.7   |
| 30 | Mbov_0063 <sup>a,b</sup> | AFM51438.1   | GO:0005737 | C:cytoplasm           | 0.7   |
| 31 | Mbov_0068 <sup>a,b</sup> | AFM51443.1   | GO:0005737 | C:cytoplasm           | 0.7   |

|    |                          |            |            |                       |      |
|----|--------------------------|------------|------------|-----------------------|------|
| 32 | Mbov_0069 <sup>a,b</sup> | AFM51444.1 | GO:0005737 | C:cytoplasm           | 0.7  |
| 33 | Mbov_0071 <sup>a,b</sup> | AFM51446.1 | GO:0005737 | C:cytoplasm           | 0.7  |
| 34 | Mbov_0072 <sup>a,b</sup> | AFM51447.1 | GO:0005886 | C:plasma membrane     | 0.63 |
| 35 | Mbov_0074 <sup>a,b</sup> | AFM51449.1 | GO:0005737 | C:cytoplasm           | 0.7  |
| 36 | Mbov_0075 <sup>a</sup>   | AFM51450.1 | GO:0005737 | C:cytoplasm           | 0.7  |
| 37 | Mbov_0076 <sup>a,b</sup> | AFM51451.1 | GO:0005737 | C:cytoplasm           | 0.7  |
| 38 | Mbov_0077 <sup>a,b</sup> | AFM51452.1 | GO:0005737 | C:cytoplasm           | 0.7  |
| 39 | Mbov_0078 <sup>a,b</sup> | AFM51453.1 | GO:0005737 | C:cytoplasm           | 0.7  |
| 40 | Mbov_0079 <sup>a</sup>   | AFM51454.1 | GO:0005737 | C:cytoplasm           | 0.7  |
| 41 | Mbov_0080 <sup>a,b</sup> | AFM51455.1 | GO:0005737 | C:cytoplasm           | 0.7  |
| 42 | Mbov_0082 <sup>a,b</sup> | AFM51457.1 | GO:0005886 | C:plasma membrane     | 0.48 |
| 43 | Mbov_0083 <sup>a,b</sup> | AFM51458.1 | GO:0005737 | C:cytoplasm           | 0.7  |
| 44 | Mbov_0085 <sup>a,b</sup> | AFM51460.1 | GO:0005737 | C:cytoplasm           | 0.7  |
| 45 | Mbov_0086 <sup>a,b</sup> | AFM51461.1 | GO:0005737 | C:cytoplasm           | 0.7  |
| 46 | Mbov_0088 <sup>a,b</sup> | AFM51463.1 | GO:0005737 | C:cytoplasm           | 0.7  |
| 47 | Mbov_0089 <sup>a,b</sup> | AFM51464.1 | GO:0005737 | C:cytoplasm           | 0.7  |
| 48 | Mbov_0093 <sup>a</sup>   | AFM51468.1 | GO:0005737 | C:cytoplasm           | 0.7  |
| 49 | Mbov_0094 <sup>a,b</sup> | AFM51469.1 | GO:0005737 | C:cytoplasm           | 0.7  |
| 50 | Mbov_0095 <sup>a</sup>   | AFM51470.1 | GO:0005737 | C:cytoplasm           | 0.7  |
| 51 | Mbov_0096 <sup>a</sup>   | AFM51471.1 | GO:0005737 | C:cytoplasm           | 0.7  |
| 52 | Mbov_0098 <sup>a,b</sup> | AFM51473.1 | GO:0005737 | C:cytoplasm           | 0.7  |
| 53 | Mbov_0100 <sup>a,b</sup> | AFM51475.1 | GO:0005737 | C:cytoplasm           | 0.7  |
| 54 | Mbov_0102 <sup>a,b</sup> | AFM51477.1 | GO:0005737 | C:cytoplasm           | 0.7  |
| 55 | Mbov_0103 <sup>a,b</sup> | AFM51478.1 | GO:0005737 | C:cytoplasm           | 0.7  |
| 56 | Mbov_0104 <sup>a,b</sup> | AFM51479.1 | GO:0005737 | C:cytoplasm           | 0.7  |
| 57 | Mbov_0105 <sup>a,b</sup> | AFM51480.1 | GO:0005737 | C:cytoplasm           | 0.7  |
| 58 | Mbov_0106 <sup>a,b</sup> | AFM51481.1 | GO:0005737 | C:cytoplasm           | 0.7  |
| 59 | Mbov_0107 <sup>a,b</sup> | AFM51482.1 | GO:0005737 | C:cytoplasm           | 0.7  |
| 60 | Mbov_0109 <sup>a,b</sup> | AFM51484.1 | GO:0005737 | C:cytoplasm           | 0.7  |
| 61 | Mbov_0111 <sup>a,b</sup> | AFM51486.1 | GO:0005615 | C:extracellular space | 0.77 |
| 62 | Mbov_0114 <sup>a,b</sup> | AFM51489.1 | GO:0005737 | C:cytoplasm           | 0.7  |
| 63 | Mbov_0115 <sup>a,b</sup> | AFM51490.1 | GO:0005737 | C:cytoplasm           | 0.7  |
| 64 | Mbov_0120 <sup>a,b</sup> | AFM51495.2 | GO:0005737 | C:cytoplasm           | 0.7  |
| 65 | Mbov_0123 <sup>a,b</sup> | AFM51498.2 | GO:0005737 | C:cytoplasm           | 0.7  |

|    |                          |            |            |                       |      |
|----|--------------------------|------------|------------|-----------------------|------|
| 66 | Mbov_0124 <sup>a,b</sup> | AFM51499.2 | GO:0005737 | C:cytoplasm           | 0.7  |
| 67 | Mbov_0125 <sup>a,b</sup> | AFM51500.1 | GO:0005737 | C:cytoplasm           | 0.7  |
| 68 | Mbov_0126 <sup>a,b</sup> | AFM51501.1 | GO:0005737 | C:cytoplasm           | 0.7  |
| 69 | Mbov_0127 <sup>a,b</sup> | AFM51502.1 | GO:0005737 | C:cytoplasm           | 0.7  |
| 70 | Mbov_0131 <sup>a,b</sup> | AFM51506.1 | GO:0005737 | C:cytoplasm           | 0.7  |
| 71 | Mbov_0133 <sup>a,b</sup> | AFM51508.1 | GO:0005737 | C:cytoplasm           | 0.7  |
| 72 | Mbov_0139 <sup>a</sup>   | AFM51514.1 | GO:0005737 | C:cytoplasm           | 0.7  |
| 73 | Mbov_0141 <sup>a</sup>   | AFM51516.1 | GO:0005737 | C:cytoplasm           | 0.7  |
| 74 | Mbov_0145 <sup>a</sup>   | AFM51518.1 | GO:0005737 | C:cytoplasm           | 0.7  |
| 75 | Mbov_0148 <sup>a,b</sup> | AFM51521.1 | GO:0005886 | C:plasma membrane     | 0.62 |
| 76 | Mbov_0149 <sup>a,b</sup> | AFM51522.1 | GO:0005737 | C:cytoplasm           | 0.7  |
| 77 | Mbov_0150 <sup>a,b</sup> | AFM51523.1 | GO:0005737 | C:cytoplasm           | 0.7  |
| 78 | Mbov_0151 <sup>a,b</sup> | AFM51524.1 | GO:0005737 | C:cytoplasm           | 0.7  |
| 79 | Mbov_0152 <sup>a,b</sup> | AFM51525.1 | GO:0005737 | C:cytoplasm           | 0.7  |
| 80 | Mbov_0153 <sup>a,b</sup> | AFM51526.1 | GO:0005737 | C:cytoplasm           | 0.7  |
| 81 | Mbov_0154 <sup>a,b</sup> | AFM51527.1 | GO:0005615 | C:extracellular space | 0.96 |
| 82 | Mbov_0155 <sup>a,b</sup> | AFM51528.1 | GO:0005737 | C:cytoplasm           | 0.7  |
| 83 | Mbov_0156 <sup>a,b</sup> | AFM51529.1 | GO:0005615 | C:extracellular space | 0.92 |
| 84 | Mbov_0157 <sup>a,b</sup> | AFM51530.1 | GO:0005737 | C:cytoplasm           | 0.7  |
| 85 | Mbov_0158 <sup>a</sup>   | AFM51531.1 | GO:0005737 | C:cytoplasm           | 0.7  |
| 86 | Mbov_0160 <sup>a,b</sup> | AFM51533.1 | GO:0005737 | C:cytoplasm           | 0.7  |
| 87 | Mbov_0165 <sup>a,b</sup> | AFM51536.1 | GO:0005737 | C:cytoplasm           | 0.7  |
| 88 | Mbov_0168 <sup>a,b</sup> | AFM51537.1 | GO:0005737 | C:cytoplasm           | 0.7  |
| 89 | Mbov_0174 <sup>a,b</sup> | AFM51543.1 | GO:0005737 | C:cytoplasm           | 0.7  |
| 90 | Mbov_0175 <sup>a,b</sup> | AFM51544.1 | GO:0005737 | C:cytoplasm           | 0.7  |
| 91 | Mbov_0176 <sup>a,b</sup> | AFM51545.1 | GO:0005737 | C:cytoplasm           | 0.7  |
| 92 | Mbov_0190 <sup>a,b</sup> | AFM51559.2 | GO:0005886 | C:plasma membrane     | 0.84 |
| 93 | Mbov_0191 <sup>a,b</sup> | AFM51560.1 | GO:0005737 | C:cytoplasm           | 0.7  |
| 94 | Mbov_0192 <sup>a,b</sup> | AFM51561.1 | GO:0005737 | C:cytoplasm           | 0.7  |
| 95 | Mbov_0196 <sup>a,b</sup> | AFM51565.1 | GO:0005737 | C:cytoplasm           | 0.7  |
| 96 | Mbov_0197 <sup>a,b</sup> | AFM51566.1 | GO:0005886 | C:plasma membrane     | 0.8  |
| 97 | Mbov_0198 <sup>a,b</sup> | AFM51567.1 | GO:0005737 | C:cytoplasm           | 0.7  |
| 98 | Mbov_0199 <sup>a</sup>   | AFM51568.1 | GO:0005737 | C:cytoplasm           | 0.7  |
| 99 | Mbov_0200 <sup>a,b</sup> | AFM51569.1 | GO:0005737 | C:cytoplasm           | 0.7  |

|     |                          |            |            |                       |      |
|-----|--------------------------|------------|------------|-----------------------|------|
| 100 | Mbov_0202 <sup>a,b</sup> | AFM51571.1 | GO:0005737 | C:cytoplasm           | 0.7  |
| 101 | Mbov_0203 <sup>a,b</sup> | AFM51572.1 | GO:0005737 | C:cytoplasm           | 0.7  |
| 102 | Mbov_0205 <sup>a,b</sup> | AFM51574.1 | GO:0005737 | C:cytoplasm           | 0.7  |
| 103 | Mbov_0206 <sup>a,b</sup> | AFM51575.1 | GO:0005737 | C:cytoplasm           | 0.7  |
| 104 | Mbov_0207 <sup>a</sup>   | AFM51576.1 | GO:0005737 | C:cytoplasm           | 0.7  |
| 105 | Mbov_0210 <sup>a</sup>   | AFM51579.1 | GO:0005737 | C:cytoplasm           | 0.7  |
| 106 | Mbov_0211 <sup>b</sup>   | AFM51580.1 | GO:0005615 | C:extracellular space | 0.96 |
| 107 | Mbov_0212 <sup>a,b</sup> | AFM51581.1 | GO:0005737 | C:cytoplasm           | 0.7  |
| 108 | Mbov_0213 <sup>a,b</sup> | AFM51582.1 | GO:0005737 | C:cytoplasm           | 0.7  |
| 109 | Mbov_0214 <sup>a,b</sup> | AFM51583.1 | GO:0005737 | C:cytoplasm           | 0.7  |
| 110 | Mbov_0216 <sup>a,b</sup> | AFM51585.1 | GO:0005737 | C:cytoplasm           | 0.7  |
| 111 | Mbov_0217 <sup>a,b</sup> | AFM51586.1 | GO:0005615 | C:extracellular space | 0.96 |
| 112 | Mbov_0218 <sup>a,b</sup> | AFM51587.1 | GO:0005737 | C:cytoplasm           | 0.7  |
| 113 | Mbov_0220 <sup>a,b</sup> | AFM51589.1 | GO:0005737 | C:cytoplasm           | 0.7  |
| 114 | Mbov_0222 <sup>a,b</sup> | AFM51591.1 | GO:0005737 | C:cytoplasm           | 0.7  |
| 115 | Mbov_0223 <sup>a</sup>   | AFM51592.2 | GO:0005737 | C:cytoplasm           | 0.7  |
| 116 | Mbov_0224 <sup>a,b</sup> | AFM51593.1 | GO:0005737 | C:cytoplasm           | 0.7  |
| 117 | Mbov_0225 <sup>a,b</sup> | AFM51594.1 | GO:0005737 | C:cytoplasm           | 0.7  |
| 118 | Mbov_0226 <sup>a,b</sup> | AFM51595.1 | GO:0005737 | C:cytoplasm           | 0.7  |
| 119 | Mbov_0227 <sup>a,b</sup> | AFM51596.1 | GO:0005737 | C:cytoplasm           | 0.7  |
| 120 | Mbov_0228 <sup>a,b</sup> | AFM51597.1 | GO:0005737 | C:cytoplasm           | 0.7  |
| 121 | Mbov_0231 <sup>a,b</sup> | AFM51600.1 | GO:0005737 | C:cytoplasm           | 0.7  |
| 122 | Mbov_0232 <sup>a</sup>   | AFM51601.1 | GO:0005737 | C:cytoplasm           | 0.7  |
| 123 | Mbov_0235 <sup>a,b</sup> | AFM51604.1 | GO:0005737 | C:cytoplasm           | 0.7  |
| 124 | Mbov_0237 <sup>a,b</sup> | AFM51606.1 | GO:0005737 | C:cytoplasm           | 0.7  |
| 125 | Mbov_0239 <sup>a</sup>   | AFM51608.1 | GO:0005737 | C:cytoplasm           | 0.7  |
| 126 | Mbov_0242 <sup>a,b</sup> | AFM51611.1 | GO:0005737 | C:cytoplasm           | 0.7  |
| 127 | Mbov_0243 <sup>a,b</sup> | AFM51612.1 | GO:0005737 | C:cytoplasm           | 0.7  |
| 128 | Mbov_0244 <sup>a,b</sup> | AFM51613.1 | GO:0005737 | C:cytoplasm           | 0.7  |
| 129 | Mbov_0247 <sup>a,b</sup> | AFM51616.1 | GO:0005737 | C:cytoplasm           | 0.7  |
| 130 | Mbov_0255 <sup>a,b</sup> | AFM51624.1 | GO:0005737 | C:cytoplasm           | 0.7  |
| 131 | Mbov_0256 <sup>a,b</sup> | AFM51625.1 | GO:0005737 | C:cytoplasm           | 0.7  |
| 132 | Mbov_0266 <sup>a,b</sup> | AFM51635.1 | GO:0005737 | C:cytoplasm           | 0.7  |
| 133 | Mbov_0267 <sup>a,b</sup> | AFM51636.1 | GO:0005737 | C:cytoplasm           | 0.7  |

|     |                          |            |            |                       |      |
|-----|--------------------------|------------|------------|-----------------------|------|
| 134 | Mbov_0268 <sup>a,b</sup> | AFM51637.1 | GO:0005737 | C:cytoplasm           | 0.7  |
| 135 | Mbov_0269 <sup>a</sup>   | AFM51638.1 | GO:0005737 | C:cytoplasm           | 0.7  |
| 136 | Mbov_0270 <sup>a,b</sup> | AFM51639.1 | GO:0005737 | C:cytoplasm           | 0.7  |
| 137 | Mbov_0274 <sup>a</sup>   | AFM51642.1 | GO:0005615 | C:extracellular space | 0.91 |
| 138 | Mbov_0277 <sup>a,b</sup> | AFM51645.1 | GO:0005737 | C:cytoplasm           | 0.7  |
| 139 | Mbov_0278 <sup>a,b</sup> | AFM51646.1 | GO:0005737 | C:cytoplasm           | 0.7  |
| 140 | Mbov_0283 <sup>b</sup>   | AFM51651.1 | GO:0005615 | C:extracellular space | 0.96 |
| 141 | Mbov_0286 <sup>a,b</sup> | AFM51654.1 | GO:0005737 | C:cytoplasm           | 0.7  |
| 142 | Mbov_0290 <sup>b</sup>   | AFM51658.1 | GO:0005615 | C:extracellular space | 0.91 |
| 143 | Mbov_0294 <sup>a,b</sup> | AFM51662.1 | GO:0005737 | C:cytoplasm           | 0.7  |
| 144 | Mbov_0295 <sup>a,b</sup> | AFM51663.1 | GO:0005737 | C:cytoplasm           | 0.7  |
| 145 | Mbov_0296 <sup>b</sup>   | AFM51664.1 | GO:0005615 | C:extracellular space | 0.96 |
| 146 | Mbov_0297 <sup>a,b</sup> | AFM51665.2 | GO:0005737 | C:cytoplasm           | 0.7  |
| 147 | Mbov_0299 <sup>a,b</sup> | AFM51667.1 | GO:0005737 | C:cytoplasm           | 0.7  |
| 148 | Mbov_0301 <sup>a,b</sup> | AFM51669.1 | GO:0005737 | C:cytoplasm           | 0.7  |
| 149 | Mbov_0302 <sup>a,b</sup> | AFM51670.1 | GO:0005737 | C:cytoplasm           | 0.7  |
| 150 | Mbov_0303 <sup>a,b</sup> | AFM51671.1 | GO:0005737 | C:cytoplasm           | 0.7  |
| 151 | Mbov_0304 <sup>a,b</sup> | AFM51672.1 | GO:0005737 | C:cytoplasm           | 0.7  |
| 152 | Mbov_0305 <sup>a,b</sup> | AFM51673.1 | GO:0005886 | C:plasma membrane     | 0.8  |
| 153 | Mbov_0309 <sup>a,b</sup> | AFM51677.1 | GO:0005737 | C:cytoplasm           | 0.7  |
| 154 | Mbov_0310 <sup>a,b</sup> | AFM51678.1 | GO:0005737 | C:cytoplasm           | 0.7  |
| 155 | Mbov_0312 <sup>a,b</sup> | AFM51680.1 | GO:0005737 | C:cytoplasm           | 0.7  |
| 156 | Mbov_0313 <sup>a,b</sup> | AFM51681.1 | GO:0005737 | C:cytoplasm           | 0.7  |
| 157 | Mbov_0314 <sup>a,b</sup> | AFM51682.1 | GO:0005737 | C:cytoplasm           | 0.7  |
| 158 | Mbov_0315 <sup>a,b</sup> | AFM51683.1 | GO:0005737 | C:cytoplasm           | 0.7  |
| 159 | Mbov_0316 <sup>a</sup>   | AFM51684.1 | GO:0005737 | C:cytoplasm           | 0.7  |
| 160 | Mbov_0319 <sup>a,b</sup> | AFM51687.1 | GO:0005737 | C:cytoplasm           | 0.7  |
| 161 | Mbov_0321 <sup>a,b</sup> | AFM51689.1 | GO:0005737 | C:cytoplasm           | 0.7  |
| 162 | Mbov_0322 <sup>a,b</sup> | AFM51690.1 | GO:0005737 | C:cytoplasm           | 0.7  |
| 163 | Mbov_0325 <sup>a,b</sup> | AFM51693.1 | GO:0005737 | C:cytoplasm           | 0.7  |
| 164 | Mbov_0326 <sup>b</sup>   | AFM51694.1 | GO:0005615 | C:extracellular space | 0.96 |
| 165 | Mbov_0327 <sup>a,b</sup> | AFM51695.1 | GO:0005886 | C:plasma membrane     | 0.56 |
| 166 | Mbov_0328 <sup>a,b</sup> | AFM51696.1 | GO:0005737 | C:cytoplasm           | 0.7  |
| 167 | Mbov_0330 <sup>a,b</sup> | AFM51698.1 | GO:0005737 | C:cytoplasm           | 0.7  |

|     |                          |            |            |                       |      |
|-----|--------------------------|------------|------------|-----------------------|------|
| 168 | Mbov_0331 <sup>a,b</sup> | AFM51699.1 | GO:0005737 | C:cytoplasm           | 0.7  |
| 169 | Mbov_0332 <sup>a,b</sup> | AFM51700.1 | GO:0005737 | C:cytoplasm           | 0.7  |
| 170 | Mbov_0333 <sup>a,b</sup> | AFM51701.1 | GO:0005737 | C:cytoplasm           | 0.7  |
| 171 | Mbov_0334 <sup>a,b</sup> | AFM51702.1 | GO:0005737 | C:cytoplasm           | 0.7  |
| 172 | Mbov_0336 <sup>a,b</sup> | AFM51704.1 | GO:0005737 | C:cytoplasm           | 0.7  |
| 173 | Mbov_0338 <sup>a</sup>   | AFM51706.1 | GO:0005737 | C:cytoplasm           | 0.7  |
| 174 | Mbov_0339 <sup>b</sup>   | AFM51707.1 | GO:0005615 | C:extracellular space | 0.91 |
| 175 | Mbov_0341 <sup>b</sup>   | AFM51709.1 | GO:0005615 | C:extracellular space | 0.91 |
| 176 | Mbov_0350 <sup>a,b</sup> | AFM51716.1 | GO:0005615 | C:extracellular space | 0.97 |
| 177 | Mbov_0353 <sup>a,b</sup> | AFM51719.2 | GO:0005737 | C:cytoplasm           | 0.7  |
| 178 | Mbov_0364 <sup>a,b</sup> | AFM51726.1 | GO:0005615 | C:extracellular space | 0.96 |
| 179 | Mbov_0368 <sup>b</sup>   | AFM51730.1 | GO:0005615 | C:extracellular space | 0.97 |
| 180 | Mbov_0369 <sup>a,b</sup> | AFM51731.1 | GO:0005737 | C:cytoplasm           | 0.7  |
| 181 | Mbov_0370 <sup>a,b</sup> | AFM51732.1 | GO:0005737 | C:cytoplasm           | 0.7  |
| 182 | Mbov_0371 <sup>a,b</sup> | AFM51733.1 | GO:0005737 | C:cytoplasm           | 0.7  |
| 183 | Mbov_0374 <sup>b</sup>   | AFM51736.1 | GO:0005615 | C:extracellular space | 0.97 |
| 184 | Mbov_0375 <sup>a,b</sup> | AFM51737.1 | GO:0005737 | C:cytoplasm           | 0.7  |
| 185 | Mbov_0376 <sup>a</sup>   | AFM51738.1 | GO:0005737 | C:cytoplasm           | 0.7  |
| 186 | Mbov_0393 <sup>a,b</sup> | AFM51750.1 | GO:0005615 | C:extracellular space | 0.96 |
| 187 | Mbov_0400 <sup>a,b</sup> | AFM51757.1 | GO:0005737 | C:cytoplasm           | 0.7  |
| 188 | Mbov_0403 <sup>a,b</sup> | AFM51760.1 | GO:0005737 | C:cytoplasm           | 0.7  |
| 189 | Mbov_0404 <sup>a,b</sup> | AFM51761.1 | GO:0005737 | C:cytoplasm           | 0.7  |
| 190 | Mbov_0408 <sup>a,b</sup> | AFM51765.1 | GO:0005737 | C:cytoplasm           | 0.7  |
| 191 | Mbov_0411 <sup>a,b</sup> | AFM51768.1 | GO:0005737 | C:cytoplasm           | 0.7  |
| 192 | Mbov_0412 <sup>a,b</sup> | AFM51769.1 | GO:0005737 | C:cytoplasm           | 0.7  |
| 193 | Mbov_0418 <sup>a,b</sup> | AFM51775.2 | GO:0005886 | C:plasma membrane     | 0.84 |
| 194 | Mbov_0419 <sup>a,b</sup> | AFM51776.1 | GO:0005737 | C:cytoplasm           | 0.7  |
| 195 | Mbov_0421 <sup>a,b</sup> | AFM51778.1 | GO:0005737 | C:cytoplasm           | 0.7  |
| 196 | Mbov_0422 <sup>a,b</sup> | AFM51779.2 | GO:0005737 | C:cytoplasm           | 0.7  |
| 197 | Mbov_0425 <sup>a,b</sup> | AFM51782.1 | GO:0005737 | C:cytoplasm           | 0.7  |
| 198 | Mbov_0426 <sup>a,b</sup> | AFM51783.1 | GO:0005737 | C:cytoplasm           | 0.7  |
| 199 | Mbov_0427 <sup>a,b</sup> | AFM51784.1 | GO:0005737 | C:cytoplasm           | 0.7  |
| 200 | Mbov_0428 <sup>a,b</sup> | AFM51785.1 | GO:0005737 | C:cytoplasm           | 0.7  |
| 201 | Mbov_0429 <sup>a,b</sup> | AFM51786.1 | GO:0005737 | C:cytoplasm           | 0.7  |

|     |                          |            |            |                       |      |
|-----|--------------------------|------------|------------|-----------------------|------|
| 202 | Mbov_0430 <sup>a,b</sup> | AFM51787.1 | GO:0005737 | C:cytoplasm           | 0.7  |
| 203 | Mbov_0432 <sup>a,b</sup> | AFM51789.1 | GO:0005737 | C:cytoplasm           | 0.7  |
| 204 | Mbov_0433 <sup>a,b</sup> | AFM51790.1 | GO:0005737 | C:cytoplasm           | 0.7  |
| 205 | Mbov_0438 <sup>a,b</sup> | AFM51795.1 | GO:0005737 | C:cytoplasm           | 0.7  |
| 206 | Mbov_0440 <sup>a,b</sup> | AFM51797.1 | GO:0005737 | C:cytoplasm           | 0.7  |
| 207 | Mbov_0446 <sup>a,b</sup> | AFM51803.1 | GO:0005737 | C:cytoplasm           | 0.7  |
| 208 | Mbov_0449 <sup>a,b</sup> | AFM51806.2 | GO:0005615 | C:extracellular space | 0.95 |
| 209 | Mbov_0451 <sup>a,b</sup> | AFM51808.1 | GO:0005737 | C:cytoplasm           | 0.7  |
| 210 | Mbov_0452 <sup>a,b</sup> | AFM51809.1 | GO:0005737 | C:cytoplasm           | 0.7  |
| 211 | Mbov_0458 <sup>a,b</sup> | AFM51815.1 | GO:0005615 | C:extracellular space | 0.96 |
| 212 | Mbov_0461 <sup>a,b</sup> | AFM51818.1 | GO:0005615 | C:extracellular space | 0.96 |
| 213 | Mbov_0462 <sup>a,b</sup> | AFM51819.1 | GO:0005615 | C:extracellular space | 0.97 |
| 214 | Mbov_0467 <sup>b</sup>   | AFM51823.1 | GO:0005615 | C:extracellular space | 0.93 |
| 215 | Mbov_0468 <sup>a,b</sup> | AFM51824.1 | GO:0005615 | C:extracellular space | 0.97 |
| 216 | Mbov_0469 <sup>a,b</sup> | AFM51825.1 | GO:0005615 | C:extracellular space | 0.97 |
| 217 | Mbov_0471 <sup>a,b</sup> | AFM51827.1 | GO:0005615 | C:extracellular space | 0.92 |
| 218 | Mbov_0473 <sup>a,b</sup> | AFM51829.1 | GO:0005615 | C:extracellular space | 0.91 |
| 219 | Mbov_0478 <sup>a,b</sup> | AFM51834.1 | GO:0005737 | C:cytoplasm           | 0.7  |
| 220 | Mbov_0479 <sup>a</sup>   | AFM51835.1 | GO:0005737 | C:cytoplasm           | 0.7  |
| 221 | Mbov_0480 <sup>a,b</sup> | AFM51836.1 | GO:0005737 | C:cytoplasm           | 0.7  |
| 222 | Mbov_0481 <sup>a,b</sup> | AFM51837.1 | GO:0005737 | C:cytoplasm           | 0.7  |
| 223 | Mbov_0482 <sup>a,b</sup> | AFM51838.1 | GO:0005737 | C:cytoplasm           | 0.7  |
| 224 | Mbov_0485 <sup>a,b</sup> | AFM51841.1 | GO:0005886 | C:plasma membrane     | 0.64 |
| 225 | Mbov_0486 <sup>a</sup>   | AFM51842.1 | GO:0005737 | C:cytoplasm           | 0.7  |
| 226 | Mbov_0487 <sup>a</sup>   | AFM51843.1 | GO:0005737 | C:cytoplasm           | 0.7  |
| 227 | Mbov_0488 <sup>a,b</sup> | AFM51844.1 | GO:0005737 | C:cytoplasm           | 0.7  |
| 228 | Mbov_0492 <sup>a,b</sup> | AFM51848.1 | GO:0005886 | C:plasma membrane     | 0.78 |
| 229 | Mbov_0493 <sup>a,b</sup> | AFM51849.1 | GO:0005737 | C:cytoplasm           | 0.7  |
| 230 | Mbov_0494 <sup>a,b</sup> | AFM51850.1 | GO:0005737 | C:cytoplasm           | 0.7  |
| 231 | Mbov_0495 <sup>a,b</sup> | AFM51851.1 | GO:0005886 | C:plasma membrane     | 0.76 |
| 232 | Mbov_0499 <sup>a,b</sup> | AFM51855.1 | GO:0005737 | C:cytoplasm           | 0.7  |
| 233 | Mbov_0500 <sup>a,b</sup> | AFM51856.1 | GO:0005737 | C:cytoplasm           | 0.7  |
| 234 | Mbov_0502 <sup>a,b</sup> | AFM51858.1 | GO:0005737 | C:cytoplasm           | 0.7  |
| 235 | Mbov_0504 <sup>a,b</sup> | AFM51860.1 | GO:0005737 | C:cytoplasm           | 0.7  |

|     |                          |            |            |                       |      |
|-----|--------------------------|------------|------------|-----------------------|------|
| 236 | Mbov_0505 <sup>a,b</sup> | AFM51861.1 | GO:0005615 | C:extracellular space | 0.78 |
| 237 | Mbov_0508 <sup>a,b</sup> | AFM51862.1 | GO:0005737 | C:cytoplasm           | 0.7  |
| 238 | Mbov_0509 <sup>a,b</sup> | AFM51863.1 | GO:0005737 | C:cytoplasm           | 0.7  |
| 239 | Mbov_0511 <sup>a,b</sup> | AFM51865.1 | GO:0005737 | C:cytoplasm           | 0.7  |
| 240 | Mbov_0513 <sup>a,b</sup> | AFM51867.1 | GO:0005737 | C:cytoplasm           | 0.7  |
| 241 | Mbov_0515 <sup>a,b</sup> | AFM51869.1 | GO:0005615 | C:extracellular space | 0.97 |
| 242 | Mbov_0516 <sup>a,b</sup> | AFM51870.1 | GO:0005615 | C:extracellular space | 0.96 |
| 243 | Mbov_0517 <sup>a,b</sup> | AFM51871.1 | GO:0005615 | C:extracellular space | 0.95 |
| 244 | Mbov_0518 <sup>b</sup>   | AFM51872.1 | GO:0005615 | C:extracellular space | 0.96 |
| 245 | Mbov_0519 <sup>a,b</sup> | AFM51873.1 | GO:0005615 | C:extracellular space | 0.79 |
| 246 | Mbov_0520 <sup>a,b</sup> | AFM51874.1 | GO:0005737 | C:cytoplasm           | 0.7  |
| 247 | Mbov_0521 <sup>a</sup>   | AFM51875.1 | GO:0005886 | C:plasma membrane     | 0.7  |
| 248 | Mbov_0522 <sup>a,b</sup> | AFM51876.1 | GO:0005737 | C:cytoplasm           | 0.7  |
| 249 | Mbov_0528 <sup>a,b</sup> | AFM51882.1 | GO:0005737 | C:cytoplasm           | 0.7  |
| 250 | Mbov_0529 <sup>a,b</sup> | AFM51883.1 | GO:0005737 | C:cytoplasm           | 0.7  |
| 251 | Mbov_0530 <sup>a</sup>   | AFM51884.1 | GO:0005737 | C:cytoplasm           | 0.7  |
| 252 | Mbov_0531 <sup>a</sup>   | AFM51885.1 | GO:0005737 | C:cytoplasm           | 0.7  |
| 253 | Mbov_0532 <sup>a,b</sup> | AFM51886.1 | GO:0005737 | C:cytoplasm           | 0.7  |
| 254 | Mbov_0534 <sup>a,b</sup> | AFM51888.1 | GO:0005886 | C:plasma membrane     | 0.81 |
| 255 | Mbov_0535 <sup>a,b</sup> | AFM51889.1 | GO:0005737 | C:cytoplasm           | 0.7  |
| 256 | Mbov_0536 <sup>a,b</sup> | AFM51890.1 | GO:0005615 | C:extracellular space | 0.87 |
| 257 | Mbov_0537 <sup>a,b</sup> | AFM51891.1 | GO:0005615 | C:extracellular space | 0.93 |
| 258 | Mbov_0539 <sup>a,b</sup> | AFM51893.1 | GO:0005737 | C:cytoplasm           | 0.7  |
| 259 | Mbov_0541 <sup>a,b</sup> | AFM51895.1 | GO:0005737 | C:cytoplasm           | 0.7  |
| 260 | Mbov_0542 <sup>a,b</sup> | AFM51896.1 | GO:0005737 | C:cytoplasm           | 0.7  |
| 261 | Mbov_0543 <sup>a,b</sup> | AFM51897.1 | GO:0005737 | C:cytoplasm           | 0.7  |
| 262 | Mbov_0548 <sup>a,b</sup> | AFM51902.1 | GO:0005737 | C:cytoplasm           | 0.7  |
| 263 | Mbov_0549 <sup>a,b</sup> | AFM51903.1 | GO:0005737 | C:cytoplasm           | 0.7  |
| 264 | Mbov_0551 <sup>b</sup>   | AFM51905.1 | GO:0005737 | C:cytoplasm           | 0.7  |
| 265 | Mbov_0552 <sup>a,b</sup> | AFM51906.1 | GO:0005886 | C:plasma membrane     | 0.46 |
| 266 | Mbov_0553 <sup>a</sup>   | AFM51907.1 | GO:0005886 | C:plasma membrane     | 0.93 |
| 267 | Mbov_0554 <sup>a</sup>   | AFM51908.1 | GO:0005737 | C:cytoplasm           | 0.7  |
| 268 | Mbov_0555 <sup>a,b</sup> | AFM51909.1 | GO:0005737 | C:cytoplasm           | 0.7  |
| 269 | Mbov_0557 <sup>a,b</sup> | AFM51911.1 | GO:0005886 | C:plasma membrane     | 0.81 |



|     |                          |            |            |                       |      |
|-----|--------------------------|------------|------------|-----------------------|------|
| 270 | Mbov_0558 <sup>a,b</sup> | AFM51912.1 | GO:0005737 | C:cytoplasm           | 0.7  |
| 271 | Mbov_0563 <sup>a,b</sup> | AFM51917.2 | GO:0005886 | C:plasma membrane     | 0.6  |
| 272 | Mbov_0565 <sup>a,b</sup> | AFM51919.1 | GO:0005737 | C:cytoplasm           | 0.7  |
| 273 | Mbov_0566 <sup>a,b</sup> | AFM51920.1 | GO:0005737 | C:cytoplasm           | 0.7  |
| 274 | Mbov_0567 <sup>a,b</sup> | AFM51921.1 | GO:0005737 | C:cytoplasm           | 0.7  |
| 275 | Mbov_0568 <sup>a,b</sup> | AFM51922.1 | GO:0005737 | C:cytoplasm           | 0.7  |
| 276 | Mbov_0570 <sup>a,b</sup> | AFM51924.1 | GO:0005615 | C:extracellular space | 0.9  |
| 277 | Mbov_0571 <sup>a,b</sup> | AFM51925.1 | GO:0005886 | C:plasma membrane     | 0.86 |
| 278 | Mbov_0574 <sup>a,b</sup> | AFM51928.1 | GO:0005737 | C:cytoplasm           | 0.7  |
| 279 | Mbov_0576 <sup>a,b</sup> | AFM51930.1 | GO:0005737 | C:cytoplasm           | 0.7  |
| 280 | Mbov_0579 <sup>a,b</sup> | AFM51933.1 | GO:0005615 | C:extracellular space | 0.96 |
| 281 | Mbov_0580 <sup>a,b</sup> | AFM51934.1 | GO:0005615 | C:extracellular space | 0.97 |
| 282 | Mbov_0581 <sup>a,b</sup> | AFM51935.1 | GO:0005737 | C:cytoplasm           | 0.7  |
| 283 | Mbov_0585 <sup>a,b</sup> | AFM51939.1 | GO:0005615 | C:extracellular space | 0.96 |
| 284 | Mbov_0586 <sup>a,b</sup> | AFM51940.1 | GO:0005737 | C:cytoplasm           | 0.7  |
| 285 | Mbov_0587 <sup>a,b</sup> | AFM51941.1 | GO:0005737 | C:cytoplasm           | 0.7  |
| 286 | Mbov_0588 <sup>a,b</sup> | AFM51942.1 | GO:0005737 | C:cytoplasm           | 0.7  |
| 287 | Mbov_0589 <sup>a,b</sup> | AFM51943.1 | GO:0005737 | C:cytoplasm           | 0.7  |
| 288 | Mbov_0590 <sup>a,b</sup> | AFM51944.1 | GO:0005737 | C:cytoplasm           | 0.7  |
| 289 | Mbov_0591 <sup>a,b</sup> | AFM51945.1 | GO:0005737 | C:cytoplasm           | 0.7  |
| 290 | Mbov_0594 <sup>a,b</sup> | AFM51948.1 | GO:0005737 | C:cytoplasm           | 0.7  |
| 291 | Mbov_0596 <sup>a,b</sup> | AFM51950.1 | GO:0005737 | C:cytoplasm           | 0.7  |
| 292 | Mbov_0597 <sup>a,b</sup> | AFM51951.1 | GO:0005737 | C:cytoplasm           | 0.7  |
| 293 | Mbov_0598 <sup>a,b</sup> | AFM51952.1 | GO:0005737 | C:cytoplasm           | 0.7  |
| 294 | Mbov_0599 <sup>a,b</sup> | AFM51953.1 | GO:0005737 | C:cytoplasm           | 0.7  |
| 295 | Mbov_0600 <sup>a,b</sup> | AFM51954.1 | GO:0005737 | C:cytoplasm           | 0.7  |
| 296 | Mbov_0601 <sup>a,b</sup> | AFM51955.1 | GO:0005737 | C:cytoplasm           | 0.7  |
| 297 | Mbov_0602 <sup>a,b</sup> | AFM51956.1 | GO:0005737 | C:cytoplasm           | 0.7  |
| 298 | Mbov_0603 <sup>a,b</sup> | AFM51957.1 | GO:0005737 | C:cytoplasm           | 0.7  |
| 299 | Mbov_0606 <sup>a,b</sup> | AFM51959.1 | GO:0005737 | C:cytoplasm           | 0.7  |
| 300 | Mbov_0611 <sup>a</sup>   | AFM51962.1 | GO:0005737 | C:cytoplasm           | 0.7  |
| 301 | Mbov_0612 <sup>a,b</sup> | AFM51963.1 | GO:0005737 | C:cytoplasm           | 0.7  |
| 302 | Mbov_0613 <sup>a,b</sup> | AFM51964.1 | GO:0005737 | C:cytoplasm           | 0.7  |
| 303 | Mbov_0614 <sup>a,b</sup> | AFM51965.1 | GO:0005737 | C:cytoplasm           | 0.7  |

|     |                          |            |            |                       |      |
|-----|--------------------------|------------|------------|-----------------------|------|
| 304 | Mbov_0617 <sup>a,b</sup> | AFM51968.1 | GO:0005737 | C:cytoplasm           | 0.7  |
| 305 | Mbov_0618 <sup>a,b</sup> | AFM51969.1 | GO:0005737 | C:cytoplasm           | 0.7  |
| 306 | Mbov_0619 <sup>a,b</sup> | AFM51970.1 | GO:0005737 | C:cytoplasm           | 0.7  |
| 307 | Mbov_0620 <sup>a,b</sup> | AFM51971.1 | GO:0005737 | C:cytoplasm           | 0.7  |
| 308 | Mbov_0621 <sup>a,b</sup> | AFM51972.1 | GO:0005737 | C:cytoplasm           | 0.7  |
| 309 | Mbov_0622 <sup>a</sup>   | AFM51973.1 | GO:0005737 | C:cytoplasm           | 0.7  |
| 310 | Mbov_0623 <sup>a,b</sup> | AFM51974.1 | GO:0005737 | C:cytoplasm           | 0.7  |
| 311 | Mbov_0624 <sup>a,b</sup> | AFM51975.1 | GO:0005737 | C:cytoplasm           | 0.7  |
| 312 | Mbov_0625 <sup>a,b</sup> | AFM51976.1 | GO:0005737 | C:cytoplasm           | 0.7  |
| 313 | Mbov_0626 <sup>a,b</sup> | AFM51977.1 | GO:0005737 | C:cytoplasm           | 0.7  |
| 314 | Mbov_0627 <sup>a,b</sup> | AFM51978.1 | GO:0005737 | C:cytoplasm           | 0.7  |
| 315 | Mbov_0628 <sup>a</sup>   | AFM51979.1 | GO:0005737 | C:cytoplasm           | 0.7  |
| 316 | Mbov_0629 <sup>a,b</sup> | AFM51980.1 | GO:0005737 | C:cytoplasm           | 0.7  |
| 317 | Mbov_0630 <sup>a,b</sup> | AFM51981.1 | GO:0005737 | C:cytoplasm           | 0.7  |
| 318 | Mbov_0631 <sup>b</sup>   | AFM51982.1 | GO:0005737 | C:cytoplasm           | 0.7  |
| 319 | Mbov_0634 <sup>a,b</sup> | AFM51985.1 | GO:0005737 | C:cytoplasm           | 0.7  |
| 320 | Mbov_0635 <sup>a,b</sup> | AFM51986.1 | GO:0005737 | C:cytoplasm           | 0.7  |
| 321 | Mbov_0636 <sup>a</sup>   | AFM51987.1 | GO:0005737 | C:cytoplasm           | 0.7  |
| 322 | Mbov_0637 <sup>a,b</sup> | AFM51988.1 | GO:0005737 | C:cytoplasm           | 0.7  |
| 323 | Mbov_0638 <sup>a,b</sup> | AFM51989.1 | GO:0005737 | C:cytoplasm           | 0.7  |
| 324 | Mbov_0641 <sup>a,b</sup> | AFM51992.1 | GO:0005737 | C:cytoplasm           | 0.7  |
| 325 | Mbov_0642 <sup>a,b</sup> | AFM51993.1 | GO:0005737 | C:cytoplasm           | 0.7  |
| 326 | Mbov_0643 <sup>a</sup>   | AFM51994.1 | GO:0005737 | C:cytoplasm           | 0.7  |
| 327 | Mbov_0644 <sup>a,b</sup> | AFM51995.1 | GO:0005737 | C:cytoplasm           | 0.7  |
| 328 | Mbov_0646 <sup>a,b</sup> | AFM51997.1 | GO:0005737 | C:cytoplasm           | 0.7  |
| 329 | Mbov_0647 <sup>a</sup>   | AFM51998.1 | GO:0005737 | C:cytoplasm           | 0.7  |
| 330 | Mbov_0650 <sup>a,b</sup> | AFM52001.1 | GO:0005737 | C:cytoplasm           | 0.7  |
| 331 | Mbov_0651 <sup>a,b</sup> | AFM52002.1 | GO:0005737 | C:cytoplasm           | 0.7  |
| 332 | Mbov_0652 <sup>a,b</sup> | AFM52003.1 | GO:0005737 | C:cytoplasm           | 0.7  |
| 333 | Mbov_0654 <sup>a,b</sup> | AFM52005.1 | GO:0005615 | C:extracellular space | 0.8  |
| 334 | Mbov_0656 <sup>a,b</sup> | AFM52007.1 | GO:0005615 | C:extracellular space | 0.8  |
| 335 | Mbov_0658 <sup>a,b</sup> | AFM52009.1 | GO:0005615 | C:extracellular space | 0.92 |
| 336 | Mbov_0660 <sup>a,b</sup> | AFM52011.1 | GO:0005737 | C:cytoplasm           | 0.7  |
| 337 | Mbov_0661 <sup>a,b</sup> | AFM52012.1 | GO:0005737 | C:cytoplasm           | 0.7  |

|     |                          |            |            |                       |      |
|-----|--------------------------|------------|------------|-----------------------|------|
| 338 | Mbov_0663 <sup>a,b</sup> | AFM52014.1 | GO:0005737 | C:cytoplasm           | 0.7  |
| 339 | Mbov_0665 <sup>a</sup>   | AFM52016.1 | GO:0005737 | C:cytoplasm           | 0.7  |
| 340 | Mbov_0666 <sup>a,b</sup> | AFM52017.1 | GO:0005737 | C:cytoplasm           | 0.7  |
| 341 | Mbov_0667 <sup>a,b</sup> | AFM52018.1 | GO:0005737 | C:cytoplasm           | 0.7  |
| 342 | Mbov_0668 <sup>a,b</sup> | AFM52019.1 | GO:0005737 | C:cytoplasm           | 0.7  |
| 343 | Mbov_0669 <sup>a,b</sup> | AFM52020.1 | GO:0005737 | C:cytoplasm           | 0.7  |
| 344 | Mbov_0673 <sup>a,b</sup> | AFM52023.1 | GO:0005737 | C:cytoplasm           | 0.7  |
| 345 | Mbov_0674 <sup>a,b</sup> | AFM52024.1 | GO:0005615 | C:extracellular space | 0.87 |
| 346 | Mbov_0675 <sup>a,b</sup> | AFM52025.1 | GO:0005615 | C:extracellular space | 0.97 |
| 347 | Mbov_0676 <sup>a,b</sup> | AFM52026.1 | GO:0005737 | C:cytoplasm           | 0.7  |
| 348 | Mbov_0677 <sup>a,b</sup> | AFM52027.1 | GO:0005737 | C:cytoplasm           | 0.7  |
| 349 | Mbov_0678 <sup>a,b</sup> | AFM52028.1 | GO:0005737 | C:cytoplasm           | 0.7  |
| 350 | Mbov_0679 <sup>a,b</sup> | AFM52029.1 | GO:0005737 | C:cytoplasm           | 0.7  |
| 351 | Mbov_0680 <sup>a,b</sup> | AFM52030.1 | GO:0005737 | C:cytoplasm           | 0.7  |
| 352 | Mbov_0687 <sup>a,b</sup> | AFM52036.1 | GO:0005886 | C:plasma membrane     | 0.84 |
| 353 | Mbov_0691 <sup>a,b</sup> | AFM52040.1 | GO:0005737 | C:cytoplasm           | 0.7  |
| 354 | Mbov_0693 <sup>a,b</sup> | AFM52042.1 | GO:0005615 | C:extracellular space | 0.95 |
| 355 | Mbov_0694 <sup>a,b</sup> | AFM52043.1 | GO:0005737 | C:cytoplasm           | 0.7  |
| 356 | Mbov_0695 <sup>a,b</sup> | AFM52044.1 | GO:0005737 | C:cytoplasm           | 0.7  |
| 357 | Mbov_0696 <sup>a,b</sup> | AFM52045.1 | GO:0005615 | C:extracellular space | 0.96 |
| 358 | Mbov_0697 <sup>a,b</sup> | AFM52046.1 | GO:0005737 | C:cytoplasm           | 0.7  |
| 359 | Mbov_0698 <sup>a,b</sup> | AFM52047.1 | GO:0005737 | C:cytoplasm           | 0.7  |
| 360 | Mbov_0700 <sup>a,b</sup> | AFM52049.1 | GO:0005737 | C:cytoplasm           | 0.7  |
| 361 | Mbov_0701 <sup>a,b</sup> | AFM52050.1 | GO:0005737 | C:cytoplasm           | 0.7  |
| 362 | Mbov_0702 <sup>a,b</sup> | AFM52051.1 | GO:0005737 | C:cytoplasm           | 0.7  |
| 363 | Mbov_0703 <sup>a,b</sup> | AFM52052.1 | GO:0005737 | C:cytoplasm           | 0.7  |
| 364 | Mbov_0710 <sup>a,b</sup> | AFM52059.1 | GO:0005737 | C:cytoplasm           | 0.7  |
| 365 | Mbov_0711 <sup>a,b</sup> | AFM52060.1 | GO:0005737 | C:cytoplasm           | 0.7  |
| 366 | Mbov_0712 <sup>a,b</sup> | AFM52061.1 | GO:0005737 | C:cytoplasm           | 0.7  |
| 367 | Mbov_0713 <sup>a,b</sup> | AFM52062.1 | GO:0005737 | C:cytoplasm           | 0.7  |
| 368 | Mbov_0715 <sup>a,b</sup> | AFM52064.1 | GO:0005737 | C:cytoplasm           | 0.7  |
| 369 | Mbov_0718 <sup>a</sup>   | AFM52067.1 | GO:0005737 | C:cytoplasm           | 0.7  |
| 370 | Mbov_0719 <sup>a</sup>   | AFM52068.1 | GO:0005737 | C:cytoplasm           | 0.7  |
| 371 | Mbov_0720 <sup>a,b</sup> | AFM52069.1 | GO:0005737 | C:cytoplasm           | 0.7  |

|     |                          |            |            |                       |      |
|-----|--------------------------|------------|------------|-----------------------|------|
| 372 | Mbov_0721 <sup>a</sup>   | AFM52070.1 | GO:0005737 | C:cytoplasm           | 0.7  |
| 373 | Mbov_0722 <sup>a</sup>   | AFM52071.2 | GO:0005737 | C:cytoplasm           | 0.7  |
| 374 | Mbov_0724 <sup>a</sup>   | AFM52073.1 | GO:0005737 | C:cytoplasm           | 0.7  |
| 375 | Mbov_0725 <sup>a,b</sup> | AFM52074.1 | GO:0005737 | C:cytoplasm           | 0.7  |
| 376 | Mbov_0732 <sup>a</sup>   | AFM52081.1 | GO:0005737 | C:cytoplasm           | 0.7  |
| 377 | Mbov_0734 <sup>a</sup>   | AFM52083.1 | GO:0005737 | C:cytoplasm           | 0.7  |
| 378 | Mbov_0739 <sup>a,b</sup> | AFM52087.1 | GO:0005615 | C:extracellular space | 0.96 |
| 379 | Mbov_0743 <sup>a,b</sup> | AFM52091.1 | GO:0005615 | C:extracellular space | 0.82 |
| 380 | Mbov_0745 <sup>a,b</sup> | AFM52093.1 | GO:0005737 | C:cytoplasm           | 0.7  |
| 381 | Mbov_0746 <sup>a</sup>   | AFM52094.1 | GO:0005737 | C:cytoplasm           | 0.7  |
| 382 | Mbov_0747 <sup>a,b</sup> | AFM52095.1 | GO:0005737 | C:cytoplasm           | 0.7  |
| 383 | Mbov_0749 <sup>a</sup>   | AFM52097.1 | GO:0005737 | C:cytoplasm           | 0.7  |
| 384 | Mbov_0750 <sup>a</sup>   | AFM52098.1 | GO:0005737 | C:cytoplasm           | 0.7  |
| 385 | Mbov_0755 <sup>a,b</sup> | AFM52103.1 | GO:0005737 | C:cytoplasm           | 0.7  |
| 386 | Mbov_0758 <sup>a</sup>   | AFM52106.1 | GO:0005737 | C:cytoplasm           | 0.7  |
| 387 | Mbov_0760 <sup>a,b</sup> | AFM52108.1 | GO:0005886 | C:plasma membrane     | 0.87 |
| 388 | Mbov_0761 <sup>a,b</sup> | AFM52109.1 | GO:0005737 | C:cytoplasm           | 0.7  |
| 389 | Mbov_0765 <sup>a,b</sup> | AFM52113.1 | GO:0005737 | C:cytoplasm           | 0.7  |
| 390 | Mbov_0768 <sup>a,b</sup> | AFM52116.1 | GO:0005615 | C:extracellular space | 0.97 |
| 391 | Mbov_0771 <sup>a,b</sup> | AFM52119.1 | GO:0005737 | C:cytoplasm           | 0.7  |
| 392 | Mbov_0772 <sup>a,b</sup> | AFM52120.1 | GO:0005737 | C:cytoplasm           | 0.7  |
| 393 | Mbov_0773 <sup>a,b</sup> | AFM52121.1 | GO:0005737 | C:cytoplasm           | 0.7  |
| 394 | Mbov_0774 <sup>a,b</sup> | AFM52122.1 | GO:0005737 | C:cytoplasm           | 0.7  |
| 395 | Mbov_0776 <sup>a,b</sup> | AFM52124.1 | GO:0005737 | C:cytoplasm           | 0.7  |
| 396 | Mbov_0777 <sup>a,b</sup> | AFM52125.1 | GO:0005737 | C:cytoplasm           | 0.7  |
| 397 | Mbov_0778 <sup>a,b</sup> | AFM52126.1 | GO:0005886 | C:plasma membrane     | 0.9  |
| 398 | Mbov_0779 <sup>a</sup>   | AFM52127.1 | GO:0005886 | C:plasma membrane     | 0.85 |
| 399 | Mbov_0783 <sup>a,b</sup> | AFM52131.1 | GO:0005737 | C:cytoplasm           | 0.7  |
| 400 | Mbov_0784 <sup>a,b</sup> | AFM52132.1 | GO:0005737 | C:cytoplasm           | 0.7  |
| 401 | Mbov_0786 <sup>a,b</sup> | AFM52134.1 | GO:0005737 | C:cytoplasm           | 0.7  |
| 402 | Mbov_0787 <sup>a,b</sup> | AFM52135.1 | GO:0005737 | C:cytoplasm           | 0.7  |
| 403 | Mbov_0788 <sup>a,b</sup> | AFM52136.1 | GO:0005737 | C:cytoplasm           | 0.7  |
| 404 | Mbov_0789 <sup>a,b</sup> | AFM52137.1 | GO:0005737 | C:cytoplasm           | 0.7  |
| 405 | Mbov_0793 <sup>a,b</sup> | AFM52141.1 | GO:0005615 | C:extracellular space | 0.9  |

|     |                          |            |            |                       |      |
|-----|--------------------------|------------|------------|-----------------------|------|
| 406 | Mbov_0794 <sup>a,b</sup> | AFM52142.1 | GO:0005615 | C:extracellular space | 0.9  |
| 407 | Mbov_0795 <sup>a</sup>   | AFM52143.1 | GO:0005615 | C:extracellular space | 0.93 |
| 408 | Mbov_0796 <sup>a,b</sup> | AFM52144.1 | GO:0005615 | C:extracellular space | 0.95 |
| 409 | Mbov_0797 <sup>a,b</sup> | AFM52145.1 | GO:0005615 | C:extracellular space | 0.96 |
| 410 | Mbov_0798 <sup>a,b</sup> | AFM52146.1 | GO:0005615 | C:extracellular space | 0.96 |
| 411 | Mbov_0802 <sup>a,b</sup> | AFM52150.1 | GO:0005737 | C:cytoplasm           | 0.7  |
| 412 | Mbov_0804 <sup>a,b</sup> | AFM52152.2 | GO:0005737 | C:cytoplasm           | 0.7  |
| 413 | Mbov_0806 <sup>a,b</sup> | AFM52154.1 | GO:0005737 | C:cytoplasm           | 0.7  |
| 414 | Mbov_0807 <sup>a,b</sup> | AFM52155.1 | GO:0005737 | C:cytoplasm           | 0.7  |
| 415 | Mbov_0808 <sup>a,b</sup> | AFM52156.1 | GO:0005737 | C:cytoplasm           | 0.7  |
| 316 | Mbov_0810 <sup>a,b</sup> | AFM52158.1 | GO:0005737 | C:cytoplasm           | 0.7  |
| 417 | Mbov_0811 <sup>a,b</sup> | AFM52159.1 | GO:0005737 | C:cytoplasm           | 0.7  |
| 418 | Mbov_0813 <sup>a,b</sup> | AFM52161.1 | GO:0005737 | C:cytoplasm           | 0.7  |
| 419 | Mbov_0814 <sup>a,b</sup> | AFM52162.1 | GO:0005737 | C:cytoplasm           | 0.7  |
| 420 | Mbov_0815 <sup>a,b</sup> | AFM52163.1 | GO:0005737 | C:cytoplasm           | 0.7  |
| 421 | Mbov_0817 <sup>a,b</sup> | AFM52165.1 | GO:0005737 | C:cytoplasm           | 0.7  |
| 422 | Mbov_0818 <sup>a,b</sup> | AFM52166.2 | GO:0005737 | C:cytoplasm           | 0.7  |
| 423 | Mbov_0819 <sup>a,b</sup> | AFM52167.1 | GO:0005737 | C:cytoplasm           | 0.7  |
| 424 | Mbov_0820 <sup>a,b</sup> | AFM52168.1 | GO:0005737 | C:cytoplasm           | 0.7  |
| 425 | Mbov_0821 <sup>a,b</sup> | AFM52169.1 | GO:0005737 | C:cytoplasm           | 0.7  |
| 426 | Mbov_0822 <sup>a,b</sup> | AFM52170.1 | GO:0005737 | C:cytoplasm           | 0.7  |
| 427 | Mbov_0823 <sup>a,b</sup> | AFM52171.1 | GO:0005737 | C:cytoplasm           | 0.7  |
| 428 | Mbov_0824 <sup>a,b</sup> | AFM52172.2 | GO:0005737 | C:cytoplasm           | 0.7  |
| 429 | Mbov_0825 <sup>a,b</sup> | AFM52173.1 | GO:0005737 | C:cytoplasm           | 0.7  |
| 430 | Mbov_0831 <sup>a,b</sup> | AFM52176.1 | GO:0005737 | C:cytoplasm           | 0.7  |
| 431 | Mbov_0832 <sup>a,b</sup> | AFM52177.1 | GO:0005737 | C:cytoplasm           | 0.7  |
| 432 | Mbov_0833 <sup>a</sup>   | AFM52178.1 | GO:0005737 | C:cytoplasm           | 0.7  |
| 433 | Mbov_0838 <sup>a,b</sup> | AFM52183.1 | GO:0005737 | C:cytoplasm           | 0.7  |
| 434 | Mbov_0839 <sup>a</sup>   | AFM52184.1 | GO:0005737 | C:cytoplasm           | 0.7  |
| 435 | Mbov_0843 <sup>a</sup>   | AFM52188.1 | GO:0005737 | C:cytoplasm           | 0.7  |
| 436 | Mbov_0845 <sup>a,b</sup> | AFM52189.1 | GO:0005886 | C:plasma membrane     | 0.89 |
| 437 | Mbov_0847 <sup>a,b</sup> | AFM52191.1 | GO:0005737 | C:cytoplasm           | 0.7  |
| 438 | Mbov_0848 <sup>a</sup>   | AFM52192.1 | GO:0005737 | C:cytoplasm           | 0.7  |

a: related to *M. bovis* HB0801-P1, b: related to P150 and a,b: related to both (*M. bovis* HB0801-P1, and P150).

**Table S2** Subcellular localization of *M. bovis* proteins prediction by using PSORTb 3.0 server.

| No | Proteins ID              | Accession No | Protein Name                                                      | Final Prediction    | Localization Score |
|----|--------------------------|--------------|-------------------------------------------------------------------|---------------------|--------------------|
| 1  | Mbov_0001 <sup>a</sup>   | AFM51379.1   | replication initiation protein                                    | Cytoplasmic         | 9.97               |
| 2  | Mbov_0002 <sup>a,b</sup> | AFM51380.1   | DNA polymerase III subunit beta                                   | Unknown             |                    |
| 3  | Mbov_0003 <sup>a</sup>   | AFM51381.1   | hypothetical protein Mbov_0003                                    | Unknown             |                    |
| 4  | Mbov_0004 <sup>a,b</sup> | AFM51382.1   | transposase ISMbov7                                               | Unknown             |                    |
| 5  | Mbov_0006 <sup>a,b</sup> | AFM51384.1   | esterase/lipase                                                   | Unknown             |                    |
| 6  | Mbov_0007 <sup>a,b</sup> | AFM51385.1   | lipase                                                            | Unknown             |                    |
| 7  | Mbov_0008 <sup>a,b</sup> | AFM51386.1   | NADH dependent flavin oxidoreductase                              | Cytoplasmic         | 7.50               |
| 8  | Mbov_0009 <sup>a,b</sup> | AFM51387.1   | lipoate-protein ligase A                                          | Cytoplasmic         | 9.97               |
| 9  | Mbov_0010 <sup>a,b</sup> | AFM51388.1   | lipoate-protein ligase A                                          | Cytoplasmic         | 9.97               |
| 10 | Mbov_0011 <sup>a,b</sup> | AFM51389.1   | trimethylamine dehydrogenase                                      | Unknown             |                    |
| 11 | Mbov_0012 <sup>a,b</sup> | AFM51390.1   | glycine cleavage system H protein                                 | Unknown             |                    |
| 12 | Mbov_0016 <sup>a,b</sup> | AFM51394.1   | P48-like surface lipoprotein                                      | Unknown             |                    |
| 13 | Mbov_0018 <sup>a,b</sup> | AFM51396.1   | simple sugar ABC transporter ATP-binding protein.P59-like protein | CytoplasmicMembrane | 9.99               |
| 14 | Mbov_0022 <sup>a,b</sup> | AFM51400.1   | deoxyguanosine kinase                                             | Cytoplasmic         | 7.50               |
| 15 | Mbov_0023 <sup>a,b</sup> | AFM51401.1   | deoxyguanosine kinase                                             | Unknown             |                    |
| 16 | Mbov_0025 <sup>a,b</sup> | AFM51403.1   | hypothetical protein Mbov_0025                                    | Cytoplasmic         | 7.50               |
| 17 | Mbov_0026 <sup>a,b</sup> | AFM51404.1   | ribokinase family sugar kinase                                    | Unknown             |                    |
| 18 | Mbov_0027 <sup>a</sup>   | AFM51405.1   | putative Hydrolase of the HAD superfamily                         | Cytoplasmic         | 7.50               |
| 19 | Mbov_0037 <sup>a,b</sup> | AFM51415.2   | oligopeptide ABC transporter substrate-binding protein            | Unknown             |                    |
| 20 | Mbov_0038 <sup>a,b</sup> | AFM51416.1   | putative transmembrane protein                                    | Unknown             |                    |
| 21 | Mbov_0044 <sup>a</sup>   | AFM51419.1   | RNA methyltransferase                                             | Unknown             |                    |
| 22 | Mbov_0048 <sup>a,b</sup> | AFM51423.1   | transcriptional antiterminator                                    | Cytoplasmic         | 7.50               |
| 23 | Mbov_0049 <sup>a,b</sup> | AFM51424.1   | putative lipoprotein                                              | Cytoplasmic         | 7.50               |
| 24 | Mbov_0051 <sup>a,b</sup> | AFM51426.1   | uridylyate kinase                                                 | Cytoplasmic         | 7.50               |
| 25 | Mbov_0052 <sup>a,b</sup> | AFM51427.1   | ribosome recycling factor                                         | Cytoplasmic         | 9.97               |
| 26 | Mbov_0056 <sup>a,b</sup> | AFM51431.1   | glycerol-3-phosphate dehydrogenase                                | Unknown             |                    |
| 27 | Mbov_0058 <sup>a</sup>   | AFM51433.1   | TatD DNase family protein                                         | Cytoplasmic         | 9.97               |
| 28 | Mbov_0059 <sup>a,b</sup> | AFM51434.1   | tRNA modification GTPase                                          | Cytoplasmic         | 9.97               |
| 29 | Mbov_0062 <sup>a,b</sup> | AFM51437.1   | glyceraldehyde 3-phosphate dehydrogenase                          | Cytoplasmic         | 9.97               |

|    |                          |            |                                                   |                     |       |
|----|--------------------------|------------|---------------------------------------------------|---------------------|-------|
| 30 | Mbov_0063 <sup>a,b</sup> | AFM51438.1 | seryl-tRNA synthetase                             | Cytoplasmic         | 10.00 |
| 31 | Mbov_0068 <sup>a,b</sup> | AFM51443.1 | lipoate-protein ligase A                          | Cytoplasmic         | 9.97  |
| 32 | Mbov_0069 <sup>a,b</sup> | AFM51444.1 | putative hydrolase/ acyltransferase               | Unknown             |       |
| 33 | Mbov_0071 <sup>a,b</sup> | AFM51446.1 | aspartate ammonia ligase                          | Cytoplasmic         | 10.00 |
| 34 | Mbov_0072 <sup>a,b</sup> | AFM51447.1 | DNA polymerase III subunit alpha                  | Cytoplasmic         | 9.97  |
| 35 | Mbov_0074 <sup>a,b</sup> | AFM51449.1 | phenylalanyl-tRNA synthetase alpha chain          | Cytoplasmic         | 10.00 |
| 36 | Mbov_0075 <sup>a</sup>   | AFM51450.1 | uracil-DNA glycosylase                            | Cytoplasmic         | 9.67  |
| 37 | Mbov_0076 <sup>a,b</sup> | AFM51451.1 | phenylalanyl-tRNA synthetase beta chain           | Cytoplasmic         | 9.97  |
| 38 | Mbov_0077 <sup>a,b</sup> | AFM51452.1 | serine hydroxymethyltransferase                   | Cytoplasmic         | 9.97  |
| 39 | Mbov_0078 <sup>a,b</sup> | AFM51453.1 | proline iminopeptidase                            | Cytoplasmic         | 9.97  |
| 40 | Mbov_0079 <sup>a</sup>   | AFM51454.1 | cysteine desulfurase                              | Cytoplasmic         | 9.67  |
| 41 | Mbov_0080 <sup>a,b</sup> | AFM51455.1 | nitrogen fixation protein                         | Cytoplasmic         | 7.50  |
| 42 | Mbov_0082 <sup>a,b</sup> | AFM51457.1 | nicotinate-nucleotide adenyllyltransferase        | Cytoplasmic         | 7.50  |
| 43 | Mbov_0083 <sup>a,b</sup> | AFM51458.1 | ribosomal large subunit pseudouridine synthase B  | Cytoplasmic         | 9.97  |
| 44 | Mbov_0085 <sup>a,b</sup> | AFM51460.1 | Hypothetical protein Mbov_0085                    | Cytoplasmic         | 7.50  |
| 45 | Mbov_0086 <sup>a,b</sup> | AFM51461.1 | fructose-bisphosphate aldolase                    | Unknown             |       |
| 46 | Mbov_0088 <sup>a,b</sup> | AFM51463.1 | 50S ribosomal protein                             | Cytoplasmic         | 9.97  |
| 47 | Mbov_0089 <sup>a,b</sup> | AFM51464.1 | 50S ribosomal protein                             | Cytoplasmic         | 9.67  |
| 48 | Mbov_0093 <sup>a</sup>   | AFM51468.1 | RNA methyltransferase                             | Unknown             |       |
| 49 | Mbov_0094 <sup>a,b</sup> | AFM51469.1 | RNA methyltransferase                             | Cytoplasmic         | 7.50  |
| 50 | Mbov_0095 <sup>a</sup>   | AFM51470.1 | Hypothetical protein Mbov_0095                    | Unknown             |       |
| 51 | Mbov_0096 <sup>a</sup>   | AFM51471.1 | putative GTPase                                   | CytoplasmicMembrane | 9.55  |
| 52 | Mbov_0098 <sup>a,b</sup> | AFM51473.1 | HPr kinase/phosphorylase                          | Cytoplasmic         | 7.50  |
| 53 | Mbov_0100 <sup>a,b</sup> | AFM51475.1 | thioredoxin reductase                             | Cytoplasmic         | 9.97  |
| 54 | Mbov_0102 <sup>a,b</sup> | AFM51477.1 | pyruvate dehydrogenase E1 component subunit alpha | Cytoplasmic         | 9.97  |
| 55 | Mbov_0103 <sup>a,b</sup> | AFM51478.1 | pyruvate dehydrogenase E1 component subunit beta  | Cytoplasmic         | 7.50  |
| 56 | Mbov_0104 <sup>a,b</sup> | AFM51479.1 | Hypothetical protein Mbov_0104                    | Cytoplasmic         | 7.50  |
| 57 | Mbov_0105 <sup>a,b</sup> | AFM51480.1 | dihydrolipoamide succinyltransferase              | Cytoplasmic         | 9.97  |
| 58 | Mbov_0106 <sup>a,b</sup> | AFM51481.1 | dihydrolipoamide dehydrogenase                    | Cytoplasmic         | 9.97  |
| 59 | Mbov_0107 <sup>a,b</sup> | AFM51482.1 | transposase ISMbov1                               | Unknown             |       |
| 60 | Mbov_0109 <sup>a,b</sup> | AFM51484.1 | monophosphate biosynthesis                        | Cytoplasmic         | 7.50  |
| 61 | Mbov_0111 <sup>a,b</sup> | AFM51486.1 | putative lipoprotein                              | Unknown             |       |
| 62 | Mbov_0114 <sup>a,b</sup> | AFM51489.1 | oligopeptide ABC transporter ATP-binding protein  | CytoplasmicMembrane | 8.78  |
| 63 | Mbov_0115 <sup>a,b</sup> | AFM51490.1 | oligopeptide ABC transporter ATP-binding protein  | CytoplasmicMembrane | 9.99  |

|    |                          |            |                                                  |                     |       |
|----|--------------------------|------------|--------------------------------------------------|---------------------|-------|
| 64 | Mbov_0120 <sup>a,b</sup> | AFM51495.2 | ribose 5-phosphate isomerase B                   | Cytoplasmic         | 7.50  |
| 65 | Mbov_0123 <sup>a,b</sup> | AFM51498.2 | hypothetical protein (metal-dependent hydrolase) | Cytoplasmic         | 7.50  |
| 66 | Mbov_0124 <sup>a,b</sup> | AFM51499.2 | cytidine deaminase                               | Cytoplasmic         | 7.50  |
| 67 | Mbov_0125 <sup>a,b</sup> | AFM51500.1 | GTP-binding protein                              | CytoplasmicMembrane | 8.78  |
| 68 | Mbov_0126 <sup>a,b</sup> | AFM51501.1 | XAA-Pro aminopeptidase                           | Cytoplasmic         | 9.97  |
| 69 | Mbov_0127 <sup>a,b</sup> | AFM51502.1 | prolyl-tRNA synthetase                           | Cytoplasmic         | 10.00 |
| 70 | Mbov_0131 <sup>a,b</sup> | AFM51506.1 | phosphoketolase                                  | Unknown             |       |
| 71 | Mbov_0133 <sup>a,b</sup> | AFM51508.1 | oligoendopeptidase                               | Cytoplasmic         | 9.97  |
| 72 | Mbov_0139 <sup>a</sup>   | AFM51514.1 | 50S ribosomal protein                            | Cytoplasmic         | 9.67  |
| 73 | Mbov_0141 <sup>a</sup>   | AFM51516.1 | thiamine biosynthesis protein                    | Cytoplasmic         | 9.95  |
| 74 | Mbov_0145 <sup>a</sup>   | AFM51518.1 | putative lipoprotein                             | Unknown             |       |
| 75 | Mbov_0148 <sup>a,b</sup> | AFM51521.1 | valyl-tRNA synthetase                            | Cytoplasmic         | 9.67  |
| 76 | Mbov_0149 <sup>a,b</sup> | AFM51522.1 | methylenetetrahydrofolate dehydrogenase (NADP)   | Unknown             |       |
| 77 | Mbov_0150 <sup>a,b</sup> | AFM51523.1 | phosphate acetyltransferase                      | Cytoplasmic         | 7.50  |
| 78 | Mbov_0151 <sup>a,b</sup> | AFM51524.1 | acetate kinase                                   | Cytoplasmic         | 9.97  |
| 79 | Mbov_0152 <sup>a,b</sup> | AFM51525.1 | pantetheine-phosphate adenyltransferase          | Cytoplasmic         | 9.67  |
| 80 | Mbov_0153 <sup>a,b</sup> | AFM51526.1 | GTP-binding protein                              | CytoplasmicMembrane | 9.51  |
| 81 | Mbov_0154 <sup>a,b</sup> | AFM51527.1 | putative transmembrane protein                   | Unknown             |       |
| 82 | Mbov_0155 <sup>a,b</sup> | AFM51528.1 | pyruvate kinase                                  | Cytoplasmic         | 7.50  |
| 83 | Mbov_0156 <sup>a,b</sup> | AFM51529.1 | putative lipoprotein                             | Unknown             |       |
| 84 | Mbov_0157 <sup>a,b</sup> | AFM51530.1 | molecular chaperone DnaK                         | Cytoplasmic         | 9.97  |
| 85 | Mbov_0158 <sup>a</sup>   | AFM51531.1 | tRNA (uracil-5-)-methyltransferase Gid           | Cytoplasmic         | 9.67  |
| 86 | Mbov_0160 <sup>a,b</sup> | AFM51533.1 | D-lactate dehydrogenase                          | Cytoplasmic         | 9.97  |
| 87 | Mbov_0165 <sup>a,b</sup> | AFM51536.1 | hypothetical protein Mbov_0165                   | Cytoplasmic         | 7.50  |
| 88 | Mbov_0168 <sup>a,b</sup> | AFM51537.1 | trigger factor                                   | Cytoplasmic         | 7.50  |
| 89 | Mbov_0174 <sup>a,b</sup> | AFM51543.1 | P48-like surface lipoprotein                     | Unknown             |       |
| 90 | Mbov_0175 <sup>a,b</sup> | AFM51544.1 | DNA polymerase I                                 | Unknown             |       |
| 91 | Mbov_0176 <sup>a,b</sup> | AFM51545.1 | DNA polymerase III subunit alpha                 | Cytoplasmic         | 9.97  |
| 92 | Mbov_0190 <sup>a,b</sup> | AFM51559.2 | Hypothetical protein Mbov_0190                   | Unknown             |       |
| 93 | Mbov_0191 <sup>a,b</sup> | AFM51560.1 | glucose inhibited division protein               | Cytoplasmic         | 7.50  |
| 94 | Mbov_0192 <sup>a,b</sup> | AFM51561.1 | hypothetical protein Mbov_0192                   | Unknown             |       |
| 95 | Mbov_0196 <sup>a,b</sup> | AFM51565.1 | formylmethionyl-tRNA deformylase                 | Cytoplasmic         | 7.50  |
| 96 | Mbov_0197 <sup>a,b</sup> | AFM51566.1 | putative transmembrane protein                   | CytoplasmicMembrane | 10.00 |
| 97 | Mbov_0198 <sup>a,b</sup> | AFM51567.1 | topoisomerase IV subunit B                       | Cytoplasmic         | 9.67  |



|     |                          |            |                                                             |                     |      |
|-----|--------------------------|------------|-------------------------------------------------------------|---------------------|------|
| 98  | Mbov_0199a               | AFM51568.1 | topoisomerase IV subunit A                                  | Cytoplasmic         | 9.67 |
| 99  | Mbov_0200 <sup>a,b</sup> | AFM51569.1 | putative hydrolases of the HAD superfamily                  | Cytoplasmic         | 7.50 |
| 100 | Mbov_0202 <sup>a,b</sup> | AFM51571.1 | DNA-methyltransferase                                       | Cytoplasmic         | 7.50 |
| 101 | Mbov_0203 <sup>a,b</sup> | AFM51572.1 | Hypothetical protein Mbov_0203                              | Unknown             |      |
| 102 | Mbov_0205 <sup>a,b</sup> | AFM51574.1 | methyltransferase GidB (glucose inhibited division protein) | Cytoplasmic         | 7.50 |
| 103 | Mbov_0206 <sup>a,b</sup> | AFM51575.1 | ribose-phosphate pyrophosphokinase                          | Cytoplasmic         | 9.97 |
| 104 | Mbov_0207 <sup>a</sup>   | AFM51576.1 | Hypothetical protein Mbov_0207                              | Unknown             |      |
| 105 | Mbov_0210 <sup>a</sup>   | AFM51579.1 | Hypothetical protein Mbov_0210                              | Unknown             |      |
| 106 | Mbov_0211 <sup>b</sup>   | AFM51580.1 | Endonuclease I                                              | Extracellular       | 9.73 |
| 107 | Mbov_0212 <sup>a,b</sup> | AFM51581.1 | transketolase                                               | Unknown             |      |
| 108 | Mbov_0213 <sup>a,b</sup> | AFM51582.1 | inorganic pyrophosphatase                                   | Cytoplasmic         | 9.97 |
| 109 | Mbov_0214 <sup>a,b</sup> | AFM51583.1 | 30S ribosomal protein                                       | Cytoplasmic         | 7.50 |
| 110 | Mbov_0216 <sup>a,b</sup> | AFM51585.1 | putative transmembrane protein                              | Unknown             |      |
| 111 | Mbov_0217 <sup>a,b</sup> | AFM51586.1 | putative lipoprotein                                        | Unknown             |      |
| 112 | Mbov_0218 <sup>a,b</sup> | AFM51587.1 | HIT-like protein                                            | Cytoplasmic         | 7.50 |
| 113 | Mbov_0220 <sup>a,b</sup> | AFM51589.1 | 50S ribosomal protein                                       | Cytoplasmic         | 9.67 |
| 114 | Mbov_0222 <sup>a,b</sup> | AFM51591.1 | Thiol peroxidase                                            | Cytoplasmic         | 7.50 |
| 115 | Mbov_0223 <sup>a</sup>   | AFM51592.2 | hypothetical protein Mbov_0223                              | Cytoplasmic         | 7.50 |
| 116 | Mbov_0224 <sup>a,b</sup> | AFM51593.1 | signal recognition particle receptor                        | CytoplasmicMembrane | 9.51 |
| 117 | Mbov_0225 <sup>a,b</sup> | AFM51594.1 | Hypothetical protein Mbov_0225                              | Cytoplasmic         | 7.50 |
| 118 | Mbov_0226 <sup>a,b</sup> | AFM51595.1 | methionyl-tRNA synthetase                                   | Cytoplasmic         | 9.67 |
| 119 | Mbov_0227 <sup>a,b</sup> | AFM51596.1 | putative O-methyltransferase                                | Cytoplasmic         | 7.50 |
| 120 | Mbov_0228 <sup>a,b</sup> | AFM51597.1 | ribonuclease R                                              | Cytoplasmic         | 9.97 |
| 121 | Mbov_0231 <sup>a,b</sup> | AFM51600.1 | guanylate kinase                                            | Cytoplasmic         | 9.97 |
| 122 | Mbov_0232 <sup>a</sup>   | AFM51601.1 | protein phosphatase                                         | Unknown             |      |
| 123 | Mbov_0235 <sup>a,b</sup> | AFM51604.1 | ribulose-phosphate 3-epimerase                              | Cytoplasmic         | 7.50 |
| 124 | Mbov_0237 <sup>a,b</sup> | AFM51606.1 | transposase ISMbov5                                         | Cytoplasmic         | 7.50 |
| 125 | Mbov_0239 <sup>a</sup>   | AFM51608.1 | transposase ISMbov4                                         | Cytoplasmic         | 7.50 |
| 126 | Mbov_0242 <sup>a,b</sup> | AFM51611.1 | Hypothetical protein Mbov_0242                              | Unknown             |      |
| 127 | Mbov_0243 <sup>a,b</sup> | AFM51612.1 | type I restriction enzyme R subunit                         | Cytoplasmic         | 7.50 |
| 128 | Mbov_0244 <sup>a,b</sup> | AFM51613.1 | type I restriction enzyme M protein                         | CytoplasmicMembrane | 9.55 |
| 129 | Mbov_0247 <sup>a,b</sup> | AFM51616.1 | type I restriction enzyme S subunit                         | Unknown             |      |
| 130 | Mbov_0255 <sup>a,b</sup> | AFM51624.1 | CTP synthetase                                              | Unknown             |      |
| 131 | Mbov_0256 <sup>a,b</sup> | AFM51625.1 | isoleucyl-tRNA synthetase                                   | Cytoplasmic         | 9.97 |

|     |                          |            |                                             |             |       |
|-----|--------------------------|------------|---------------------------------------------|-------------|-------|
| 132 | Mbov_0266 <sup>a,b</sup> | AFM51635.1 | tRNA pseudouridine synthase B               | Cytoplasmic | 9.67  |
| 133 | Mbov_0267 <sup>a,b</sup> | AFM51636.1 | hypothetical protein Mbov_0267              | Cytoplasmic | 7.50  |
| 134 | Mbov_0268 <sup>a,b</sup> | AFM51637.1 | riboflavin kinase / FMN adenylyltransferase | Cytoplasmic | 7.50  |
| 135 | Mbov_0269 <sup>a</sup>   | AFM51638.1 | 30S ribosomal protein                       | Cytoplasmic | 9.97  |
| 136 | Mbov_0270 <sup>a,b</sup> | AFM51639.1 | lipase                                      | Cytoplasmic | 7.50  |
| 137 | Mbov_0274 <sup>a</sup>   | AFM51642.1 | putative lipoprotein                        | Unknown     |       |
| 138 | Mbov_0277 <sup>a,b</sup> | AFM51645.1 | 50S ribosomal protein                       | Unknown     |       |
| 139 | Mbov_0278 <sup>a,b</sup> | AFM51646.1 | replicative DNA helicase                    | Unknown     |       |
| 140 | Mbov_0283 <sup>b</sup>   | AFM51651.1 | putative lipoprotein                        | Unknown     |       |
| 141 | Mbov_0286 <sup>a,b</sup> | AFM51654.1 | NADH oxidase (NOXASE)                       | Cytoplasmic | 9.97  |
| 142 | Mbov_0290 <sup>b</sup>   | AFM51658.1 | putative lipoprotein                        | Cytoplasmic | 7.50  |
| 143 | Mbov_0294 <sup>a,b</sup> | AFM51662.1 | 30S ribosomal protein                       | Cytoplasmic | 9.67  |
| 144 | Mbov_0295 <sup>a,b</sup> | AFM51663.1 | elongation factor                           | Cytoplasmic | 9.97  |
| 145 | Mbov_0296 <sup>b</sup>   | AFM51664.1 | putative lipoprotein                        | Unknown     |       |
| 146 | Mbov_0297 <sup>a,b</sup> | AFM51665.2 | hypothetical protein Mbov_0297              | Unknown     |       |
| 147 | Mbov_0299 <sup>a,b</sup> | AFM51667.1 | NADH oxidase                                | Cytoplasmic | 9.67  |
| 148 | Mbov_0301 <sup>a,b</sup> | AFM51669.1 | hypothetical protein Mbov_0301              | Unknown     |       |
| 149 | Mbov_0302 <sup>a,b</sup> | AFM51670.1 | RNA polymerase primary sigma factor         | Cytoplasmic | 9.97  |
| 150 | Mbov_0303 <sup>a,b</sup> | AFM51671.1 | DNA primase                                 | Cytoplasmic | 7.50  |
| 151 | Mbov_0304 <sup>a,b</sup> | AFM51672.1 | glycyl-tRNA synthetase                      | Cytoplasmic | 10.00 |
| 152 | Mbov_0305 <sup>a,b</sup> | AFM51673.1 | putative transmembrane protein              | Cytoplasmic | 7.50  |
| 153 | Mbov_0309 <sup>a,b</sup> | AFM51677.1 | hypothetical protein Mbov_0309              | Unknown     |       |
| 154 | Mbov_0310 <sup>a,b</sup> | AFM51678.1 | preprotein translocase subunit SecA         | Cytoplasmic | 9.97  |
| 155 | Mbov_0312 <sup>a,b</sup> | AFM51680.1 | alcohol dehydrogenase                       | Cytoplasmic | 9.67  |
| 156 | Mbov_0313 <sup>a,b</sup> | AFM51681.1 | DNA topoisomerase I                         | Cytoplasmic | 9.67  |
| 157 | Mbov_0314 <sup>a,b</sup> | AFM51682.1 | 30S ribosomal protein                       | Cytoplasmic | 7.50  |
| 158 | Mbov_0315 <sup>a,b</sup> | AFM51683.1 | putative single-strand DNA-binding protein  | Unknown     |       |
| 159 | Mbov_0316 <sup>a</sup>   | AFM51684.1 | 30S ribosomal protein                       | Cytoplasmic | 9.97  |
| 160 | Mbov_0319 <sup>a,b</sup> | AFM51687.1 | utative translation factor                  | Unknown     |       |
| 161 | Mbov_0321 <sup>a,b</sup> | AFM51689.1 | histidyl-tRNA synthetase                    | Cytoplasmic | 10.00 |
| 162 | Mbov_0322 <sup>a,b</sup> | AFM51690.1 | aspartyl-tRNA synthetase                    | Cytoplasmic | 10.00 |
| 163 | Mbov_0325 <sup>a,b</sup> | AFM51693.1 | glycerol kinase                             | Cytoplasmic | 9.97  |
| 164 | Mbov_0326 <sup>b</sup>   | AFM51694.1 | putative secreted acid phosphatase          | Unknown     |       |
| 165 | Mbov_0327 <sup>a,b</sup> | AFM51695.1 | exopolyphosphatase-related protein          | Unknown     |       |

|     |                          |            |                                                    |                     |      |
|-----|--------------------------|------------|----------------------------------------------------|---------------------|------|
| 166 | Mbov_0328 <sup>a,b</sup> | AFM51696.1 | exopolysphatase-related protein                    | Cytoplasmic         | 7.50 |
| 167 | Mbov_0330 <sup>a,b</sup> | AFM51698.1 | Hypothetical protein Mbov_0330                     | Unknown             |      |
| 168 | Mbov_0331 <sup>a,b</sup> | AFM51699.1 | putative kinase related to dihydroxyacetone kinase | Cytoplasmic         | 7.50 |
| 169 | Mbov_0332 <sup>a,b</sup> | AFM51700.1 | glycerol-3-phosphate acyltransferase plsX          | Unknown             |      |
| 170 | Mbov_0333 <sup>a,b</sup> | AFM51701.1 | ribonuclease III                                   | Cytoplasmic         | 9.67 |
| 171 | Mbov_0334 <sup>a,b</sup> | AFM51702.1 | chromosome segregation protein                     | Cytoplasmic         | 9.97 |
| 172 | Mbov_0336 <sup>a,b</sup> | AFM51704.1 | putative hydrolase                                 | Unknown             |      |
| 173 | Mbov_0338 <sup>a</sup>   | AFM51706.1 | alcohol dehydrogenase                              | Cytoplasmic         | 9.97 |
| 174 | Mbov_0339 <sup>b</sup>   | AFM51707.1 | variable surface lipoprotein VspY1                 | Unknown             |      |
| 175 | Mbov_0341 <sup>b</sup>   | AFM51709.1 | putative transmembrane protein                     | Extracellular       | 9.13 |
| 176 | Mbov_0350 <sup>a,b</sup> | AFM51716.1 | putative lipoprotein                               | Unknown             |      |
| 177 | Mbov_0353 <sup>a,b</sup> | AFM51719.2 | alcohol dehydrogenase                              | Cytoplasmic         | 9.97 |
| 178 | Mbov_0364 <sup>a,b</sup> | AFM51726.1 | putative membrane lipoprotein                      | Unknown             |      |
| 179 | Mbov_0368 <sup>b</sup>   | AFM51730.1 | putative transmembrane protein                     | Unknown             |      |
| 180 | Mbov_0369 <sup>a,b</sup> | AFM51731.1 | purine-nucleoside phosphorylase                    | Cytoplasmic         | 7.50 |
| 181 | Mbov_0370 <sup>a,b</sup> | AFM51732.1 | tRNA-methyltransferase                             | Cytoplasmic         | 9.97 |
| 182 | Mbov_0371 <sup>a,b</sup> | AFM51733.1 | alanyl-tRNA synthetase                             | Cytoplasmic         | 9.97 |
| 183 | Mbov_0374 <sup>b</sup>   | AFM51736.1 | putative lipoprotein                               | Unknown             |      |
| 184 | Mbov_0375 <sup>a,b</sup> | AFM51737.1 | oxidoreductase                                     | Cytoplasmic         | 9.97 |
| 185 | Mbov_0376 <sup>a</sup>   | AFM51738.1 | phage-associated protein                           | Unknown             |      |
| 186 | Mbov_0393 <sup>a,b</sup> | AFM51750.1 | putative membrane lipoprotein (ICEB-1 encoded)     | Unknown             |      |
| 187 | Mbov_0400 <sup>a,b</sup> | AFM51757.1 | hypothetical protein (ICEB-1 encoded)              | Unknown             |      |
| 188 | Mbov_0403 <sup>a,b</sup> | AFM51760.1 | transcription elongation factor                    | Cytoplasmic         | 9.97 |
| 189 | Mbov_0404 <sup>a,b</sup> | AFM51761.1 | hypoxanthine phosphoribosyltransferase             | Cytoplasmic         | 9.97 |
| 190 | Mbov_0408 <sup>a,b</sup> | AFM51765.1 | translation-associated GTPase                      | Cytoplasmic         | 7.50 |
| 191 | Mbov_0411 <sup>a,b</sup> | AFM51768.1 | excinuclease ABC subunit A                         | Cytoplasmic         | 7.50 |
| 192 | Mbov_0412 <sup>a,b</sup> | AFM51769.1 | excinuclease ABC subunit B                         | Cytoplasmic         | 9.97 |
| 193 | Mbov_0418 <sup>a,b</sup> | AFM51775.2 | putative transmembrane protein                     | CytoplasmicMembrane | 9.87 |
| 194 | Mbov_0419 <sup>a,b</sup> | AFM51776.1 | Hypothetical protein Mbov_0419                     | Cytoplasmic         | 7.50 |
| 195 | Mbov_0421 <sup>a,b</sup> | AFM51778.1 | trk system potassium uptake protein                | Cytoplasmic         | 7.50 |
| 196 | Mbov_0422 <sup>a,b</sup> | AFM51779.2 | cell division protein                              | Cytoplasmic         | 7.50 |
| 197 | Mbov_0425 <sup>a,b</sup> | AFM51782.1 | cell division protein                              | Unknown             |      |
| 198 | Mbov_0426 <sup>a,b</sup> | AFM51783.1 | glycine cleavage system H protein                  | Cytoplasmic         | 7.50 |
| 199 | Mbov_0427 <sup>a,b</sup> | AFM51784.1 | ribosomal RNA small subunit methyltransferase      | Cytoplasmic         | 7.50 |

|     |                          |            |                                        |                     |       |
|-----|--------------------------|------------|----------------------------------------|---------------------|-------|
| 200 | Mbov_0428 <sup>a,b</sup> | AFM51785.1 | endopeptidase O                        | Cytoplasmic         | 9.67  |
| 201 | Mbov_0429 <sup>a,b</sup> | AFM51786.1 | single-strand DNA-binding protein      | Cytoplasmic         | 9.67  |
| 202 | Mbov_0430 <sup>a,b</sup> | AFM51787.1 | Uracil phosphoribosyltransferase       | Unknown             |       |
| 203 | Mbov_0432 <sup>a,b</sup> | AFM51789.1 | leucyl-tRNA synthetase                 | Cytoplasmic         | 9.67  |
| 204 | Mbov_0433 <sup>a,b</sup> | AFM51790.1 | ATP-dependent Lon protease             | Cytoplasmic         | 9.97  |
| 205 | Mbov_0438 <sup>a,b</sup> | AFM51795.1 | ATP synthase subunit beta              | CytoplasmicMembrane | 9.96  |
| 206 | Mbov_0440 <sup>a,b</sup> | AFM51797.1 | ATP synthase subunit alpha             | Cytoplasmic         | 9.97  |
| 207 | Mbov_0446 <sup>a,b</sup> | AFM51803.1 | hypothetical protein Mbov_0446         | Cytoplasmic         | 7.50  |
| 208 | Mbov_0449 <sup>a,b</sup> | AFM51806.2 | putative membrane lipoprotein          | Unknown             |       |
| 209 | Mbov_0451 <sup>a,b</sup> | AFM51808.1 | threonyl-tRNA synthetase               | Cytoplasmic         | 10.00 |
| 210 | Mbov_0452 <sup>a,b</sup> | AFM51809.1 | tryptophanyl-tRNA synthetase           | Cytoplasmic         | 9.97  |
| 211 | Mbov_0458 <sup>a,b</sup> | AFM51815.1 | variable surface lipoprotein           | Unknown             |       |
| 212 | Mbov_0461 <sup>a,b</sup> | AFM51818.1 | putative membrane lipoprotein          | Unknown             |       |
| 213 | Mbov_0462 <sup>a,b</sup> | AFM51819.1 | Putative lipoprotein                   | Unknown             |       |
| 214 | Mbov_0467 <sup>b</sup>   | AFM51823.1 | putative transmembrane protein         | Unknown             |       |
| 215 | Mbov_0468 <sup>a,b</sup> | AFM51824.1 | putative lipoprotein                   | Unknown             |       |
| 216 | Mbov_0469 <sup>a,b</sup> | AFM51825.1 | variable lipoprotein VspX              | Unknown             |       |
| 217 | Mbov_0471 <sup>a,b</sup> | AFM51827.1 | Periplasmic protease                   | Unknown             |       |
| 218 | Mbov_0473 <sup>a,b</sup> | AFM51829.1 | putative lipoprotein                   | Extracellular       | 9.13  |
| 219 | Mbov_0478 <sup>a,b</sup> | AFM51834.1 | O-sialoglycoprotein endopeptidase      | Unknown             |       |
| 220 | Mbov_0479 <sup>a</sup>   | AFM51835.1 | putative molecular chaperone           | Unknown             |       |
| 221 | Mbov_0480 <sup>a,b</sup> | AFM51836.1 | putative ATPase or kinase              | Cytoplasmic         | 7.50  |
| 222 | Mbov_0481 <sup>a,b</sup> | AFM51837.1 | elongation factor                      | Cytoplasmic         | 9.97  |
| 223 | Mbov_0482 <sup>a,b</sup> | AFM51838.1 | enolase                                | Cytoplasmic         | 9.97  |
| 224 | Mbov_0485 <sup>a,b</sup> | AFM51841.1 | glucose-6-phosphate isomerase          | Cytoplasmic         | 9.67  |
| 225 | Mbov_0486 <sup>a</sup>   | AFM51842.1 | formamidopyrimidine-DNA glycosylase    | Cytoplasmic         | 7.50  |
| 226 | Mbov_0487 <sup>a</sup>   | AFM51843.1 | Hypothetical protein Mbov_0487         | Unknown             |       |
| 227 | Mbov_0488 <sup>a,b</sup> | AFM51844.1 | peptide methionine sulfoxide reductase | Cytoplasmic         | 7.50  |
| 228 | Mbov_0492 <sup>a,b</sup> | AFM51848.1 | putative transmembrane protein         | Unknown             |       |
| 229 | Mbov_0493 <sup>a,b</sup> | AFM51849.1 | elongation factor                      | Cytoplasmic         | 9.97  |
| 230 | Mbov_0494 <sup>a,b</sup> | AFM51850.1 | Hypothetical protein Mbov_0494         | Unknown             |       |
| 231 | Mbov_0495 <sup>a,b</sup> | AFM51851.1 | Mg <sup>2+</sup> transport protein     | CytoplasmicMembrane | 10.00 |
| 232 | Mbov_0499 <sup>a,b</sup> | AFM51855.1 | asparaginyl-tRNA synthetase            | Cytoplasmic         | 10.00 |
| 233 | Mbov_0500 <sup>a,b</sup> | AFM51856.1 | Glycosyltransferase                    | CytoplasmicMembrane | 8.16  |

|     |                          |            |                                              |                         |       |
|-----|--------------------------|------------|----------------------------------------------|-------------------------|-------|
| 234 | Mbov_0502 <sup>a,b</sup> | AFM51858.1 | ATP-dependent DNA helicase                   | Cytoplasmic             | 9.97  |
| 235 | Mbov_0504 <sup>a,b</sup> | AFM51860.1 | hypothetical protein Mbov_0504               | Cytoplasmic             | 7.50  |
| 236 | Mbov_0505 <sup>a,b</sup> | AFM51861.1 | putative lipoprotein                         | Unknown                 |       |
| 237 | Mbov_0508 <sup>a,b</sup> | AFM51862.1 | ATPase subunit beta                          | CytoplasmicMembrane     | 9.51  |
| 238 | Mbov_0509 <sup>a,b</sup> | AFM51863.1 | ATPase subunit alpha                         | Cytoplasmic             | 9.67  |
| 239 | Mbov_0511 <sup>a,b</sup> | AFM51865.1 | hypothetical protein Mbov_0511               | Unknown                 |       |
| 240 | Mbov_0513 <sup>a,b</sup> | AFM51867.1 | hypothetical protein Mbov_0513               | Unknown                 |       |
| 241 | Mbov_0515 <sup>a,b</sup> | AFM51869.1 | putative lipoprotein                         | Unknown                 |       |
| 242 | Mbov_0516 <sup>a,b</sup> | AFM51870.1 | Putative transmembrane protein               | Unknown                 |       |
| 243 | Mbov_0517 <sup>a,b</sup> | AFM51871.1 | Putative transmembrane protein               | Unknown                 |       |
| 244 | Mbov_0518 <sup>b</sup>   | AFM51872.1 | putative lipoprotein                         | Unknown                 |       |
| 245 | Mbov_0519 <sup>a,b</sup> | AFM51873.1 | Putative transmembrane protein               | Unknown                 |       |
| 246 | Mbov_0520 <sup>a,b</sup> | AFM51874.1 | DNA ligase                                   | Cytoplasmic             | 7.50  |
| 247 | Mbov_0521 <sup>a</sup>   | AFM51875.1 | putative transmembrane protein               | CytoplasmicMembrane     | 9.55  |
| 248 | Mbov_0522 <sup>a,b</sup> | AFM51876.1 | phosphopentomutase                           | Cytoplasmic             | 9.97  |
| 249 | Mbov_0528 <sup>a,b</sup> | AFM51882.1 | DNA polymerase III subunit delta             | CytoplasmicMembrane     | 9.55  |
| 250 | Mbov_0529 <sup>a,b</sup> | AFM51883.1 | 50S ribosomal protein                        | Cytoplasmic             | 7.50  |
| 251 | Mbov_0530 <sup>a</sup>   | AFM51884.1 | 30S ribosomal protein                        | Cytoplasmic             | 9.64  |
| 252 | Mbov_0531 <sup>a</sup>   | AFM51885.1 | Hypothetical protein Mbov_0531               | Unknown                 |       |
| 253 | Mbov_0532 <sup>a,b</sup> | AFM51886.1 | UTP--glucose-1-phosphate uridylyltransferase | Cytoplasmic             | 7.50  |
| 254 | Mbov_0534 <sup>a,b</sup> | AFM51888.1 | ABC transporter permease protein             | Cytoplasmic<br>Membrane | 10.00 |
| 255 | Mbov_0535 <sup>a,b</sup> | AFM51889.1 | ABC-2 type transporter ATP-binding protein   | Cytoplasmic<br>Membrane | 8.78  |
| 256 | Mbov_0536 <sup>a,b</sup> | AFM51890.1 | putative lipoprotein                         | Unknown                 |       |
| 257 | Mbov_0537 <sup>a,b</sup> | AFM51891.1 | putative lipoprotein                         | CytoplasmicMembrane     | 9.55  |
| 258 | Mbov_0539 <sup>a,b</sup> | AFM51893.1 | phosphomannomutase                           | Cytoplasmic             | 7.50  |
| 259 | Mbov_0541 <sup>a,b</sup> | AFM51895.1 | transcription termination factor             | Unknown                 |       |
| 260 | Mbov_0542 <sup>a,b</sup> | AFM51896.1 | Acyl carrier protein phosphodiesterase       | Unknown                 |       |
| 261 | Mbov_0543 <sup>a,b</sup> | AFM51897.1 | phosphocarrier protein                       | Cytoplasmic             | 10.00 |
| 262 | Mbov_0548 <sup>a,b</sup> | AFM51902.1 | putative lipoprotein                         | Unknown                 |       |
| 263 | Mbov_0549 <sup>a,b</sup> | AFM51903.1 | translation initiation factor                | Cytoplasmic             | 9.97  |
| 264 | Mbov_0551 <sup>b</sup>   | AFM51905.1 | 50S ribosomal protein                        | Cytoplasmic             | 9.67  |
| 265 | Mbov_0552 <sup>a,b</sup> | AFM51906.1 | ATP-binding protein                          | CytoplasmicMembrane     | 9.55  |

|     |              |            |                                                    |                     |       |
|-----|--------------|------------|----------------------------------------------------|---------------------|-------|
| 266 | Mbov_0553a   | AFM51907.1 | putative transmembrane protein                     | CytoplasmicMembrane | 10.00 |
| 267 | Mbov_0554a   | AFM51908.1 | PTS lichenan-specific IIA component LicA           | Unknown             |       |
| 268 | Mbov_0555a,b | AFM51909.1 | GTP-binding protein                                | CytoplasmicMembrane | 8.78  |
| 269 | Mbov_0557a,b | AFM51911.1 | NADPH flavin oxidoreductase                        | Cytoplasmic         | 7.50  |
| 270 | Mbov_0558a,b | AFM51912.1 | triacylglycerol lipase                             | Unknown             |       |
| 271 | Mbov_0563a,b | AFM51917.2 | arginyl-tRNA synthetase                            | Cytoplasmic         | 9.97  |
| 272 | Mbov_0565a,b | AFM51919.1 | L-lactate dehydrogenase                            | Cytoplasmic         | 9.97  |
| 273 | Mbov_0566a,b | AFM51920.1 | pyruvate dehydrogenase E2 component                | Unknown             |       |
| 274 | Mbov_0567a,b | AFM51921.1 | phosphate acetyltransferase                        | Cytoplasmic         | 7.50  |
| 275 | Mbov_0568a,b | AFM51922.1 | acetate kinase                                     | Cytoplasmic         | 9.97  |
| 276 | Mbov_0570a,b | AFM51924.1 | putative lipoprotein                               | Unknown             |       |
| 277 | Mbov_0571a,b | AFM51925.1 | hexosephosphate transport protein                  | CytoplasmicMembrane | 10.00 |
| 278 | Mbov_0574a,b | AFM51928.1 | deoxyribonuclease IV                               | Cytoplasmic         | 7.50  |
| 279 | Mbov_0576a,b | AFM51930.1 | hioredoxin                                         | Unknown             |       |
| 280 | Mbov_0579a,b | AFM51933.1 | membrane lipoprotein P81                           | Unknown             |       |
| 281 | Mbov_0580a,b | AFM51934.1 | nuclease                                           | Extracellular       | 9.97  |
| 282 | Mbov_0581a,b | AFM51935.1 | multiple sugar ABC transporter ATP-binding protein | CytoplasmicMembrane | 9.51  |
| 283 | Mbov_0585a,b | AFM51939.1 | putative lipoprotein                               | Unknown             |       |
| 284 | Mbov_0586a,b | AFM51940.1 | GTP-binding protein                                | Cytoplasmic         | 7.50  |
| 285 | Mbov_0587a,b | AFM51941.1 | putative hydrolases of the HAD superfamily         | Cytoplasmic         | 7.50  |
| 286 | Mbov_0588a,b | AFM51942.1 | purine-nucleoside phosphorylase                    | Cytoplasmic         | 7.50  |
| 287 | Mbov_0589a,b | AFM51943.1 | thymidine phosphorylase                            | Cytoplasmic         | 7.50  |
| 288 | Mbov_0590a,b | AFM51944.1 | deoxyribose-phosphate aldolase                     | Cytoplasmic         | 9.97  |
| 289 | Mbov_0591a,b | AFM51945.1 | triosephosphate isomerase                          | Cytoplasmic         | 9.97  |
| 290 | Mbov_0594a,b | AFM51948.1 | cobalt/nickel ABC transporter ATP-binding protein  | CytoplasmicMembrane | 8.78  |
| 291 | Mbov_0596a,b | AFM51950.1 | 50S ribosomal protein                              | Cytoplasmic         | 9.67  |
| 292 | Mbov_0597a,b | AFM51951.1 | DNA-directed RNA polymerase subunit alpha          | Cytoplasmic         | 9.97  |
| 293 | Mbov_0598a,b | AFM51952.1 | 30S ribosomal protein                              | Cytoplasmic         | 9.67  |
| 294 | Mbov_0599a,b | AFM51953.1 | 30S ribosomal protein                              | Cytoplasmic         | 9.97  |
| 295 | Mbov_0600a,b | AFM51954.1 | Ribosomal protein                                  | Cytoplasmic         | 9.67  |
| 296 | Mbov_0601a,b | AFM51955.1 | translation initiation factor                      | Cytoplasmic         | 9.97  |
| 297 | Mbov_0602a,b | AFM51956.1 | methionyl aminopeptidase                           | Cytoplasmic         | 9.97  |
| 298 | Mbov_0603a,b | AFM51957.1 | adenylate kinase                                   | Cytoplasmic         | 9.97  |
| 299 | Mbov_0606a,b | AFM51959.1 | glucose-1-phosphatase                              | CytoplasmicMembrane | 8.16  |

|     |                          |            |                                          |             |      |
|-----|--------------------------|------------|------------------------------------------|-------------|------|
| 300 | Mbov_0611 <sup>a</sup>   | AFM51962.1 | 50S ribosomal protein                    | Unknown     |      |
| 301 | Mbov_0612 <sup>a,b</sup> | AFM51963.1 | 30S ribosomal protein                    | Cytoplasmic | 9.67 |
| 302 | Mbov_0613 <sup>a,b</sup> | AFM51964.1 | 50S ribosomal protein                    | Cytoplasmic | 9.97 |
| 303 | Mbov_0614 <sup>a,b</sup> | AFM51965.1 | 50S ribosomal protein                    | Cytoplasmic | 7.50 |
| 304 | Mbov_0617 <sup>a,b</sup> | AFM51968.1 | 50S ribosomal protein                    | Cytoplasmic | 7.50 |
| 305 | Mbov_0618 <sup>a,b</sup> | AFM51969.1 | 50S ribosomal protein                    | Cytoplasmic | 9.67 |
| 306 | Mbov_0619 <sup>a,b</sup> | AFM51970.1 | 50S ribosomal protein                    | Cytoplasmic | 9.97 |
| 307 | Mbov_0620 <sup>a,b</sup> | AFM51971.1 | 30S ribosomal protein                    | Cytoplasmic | 9.97 |
| 308 | Mbov_0621 <sup>a,b</sup> | AFM51972.1 | 50S ribosomal protein                    | Unknown     |      |
| 309 | Mbov_0622 <sup>a</sup>   | AFM51973.1 | 50S ribosomal protein                    | Cytoplasmic | 9.97 |
| 310 | Mbov_0623 <sup>a,b</sup> | AFM51974.1 | 30S ribosomal protein                    | Cytoplasmic | 9.97 |
| 311 | Mbov_0624 <sup>a,b</sup> | AFM51975.1 | 50S ribosomal protein                    | Cytoplasmic | 9.67 |
| 312 | Mbov_0625 <sup>a,b</sup> | AFM51976.1 | 30S ribosomal protein                    | Cytoplasmic | 9.97 |
| 313 | Mbov_0626 <sup>a,b</sup> | AFM51977.1 | 50S ribosomal protein                    | Unknown     |      |
| 314 | Mbov_0627 <sup>a,b</sup> | AFM51978.1 | 50S ribosomal protein                    | Cytoplasmic | 9.67 |
| 315 | Mbov_0628 <sup>a</sup>   | AFM51979.1 | 50S ribosomal protein                    | Unknown     |      |
| 316 | Mbov_0629 <sup>a,b</sup> | AFM51980.1 | 50S ribosomal protein                    | Cytoplasmic | 9.97 |
| 317 | Mbov_0630 <sup>a,b</sup> | AFM51981.1 | 30S ribosomal protein                    | Cytoplasmic | 9.67 |
| 318 | Mbov_0631 <sup>b</sup>   | AFM51982.1 | DNA-binding protein HU-beta              | Cytoplasmic | 7.50 |
| 319 | Mbov_0634 <sup>a,b</sup> | AFM51985.1 | hypothetical protein Mbov_0634           | Unknown     |      |
| 320 | Mbov_0635 <sup>a,b</sup> | AFM51986.1 | endoglucanase                            | Cytoplasmic | 7.50 |
| 321 | Mbov_0636 <sup>a</sup>   | AFM51987.1 | 16S rRNA pseudouridine synthase          | Cytoplasmic | 9.97 |
| 322 | Mbov_0637 <sup>a,b</sup> | AFM51988.1 | 50S ribosomal protein                    | Cytoplasmic | 9.67 |
| 323 | Mbov_0638 <sup>a,b</sup> | AFM51989.1 | 50S ribosomal protein                    | Cytoplasmic | 7.50 |
| 324 | Mbov_0641 <sup>a,b</sup> | AFM51992.1 | heat shock protein GrpE                  | Cytoplasmic | 7.50 |
| 325 | Mbov_0642 <sup>a,b</sup> | AFM51993.1 | heat-inducible transcriptional repressor | Unknown     |      |
| 326 | Mbov_0643 <sup>a</sup>   | AFM51994.1 | 50S ribosomal protein                    | Cytoplasmic | 9.67 |
| 327 | Mbov_0644 <sup>a,b</sup> | AFM51995.1 | 30S ribosomal protein                    | Unknown     |      |
| 328 | Mbov_0646 <sup>a,b</sup> | AFM51997.1 | DNA gyrase subunit A                     | Cytoplasmic | 9.97 |
| 329 | Mbov_0647 <sup>a</sup>   | AFM51998.1 | superfamily I DNA and RNA helicase       | Unknown     |      |
| 330 | Mbov_0650 <sup>a,b</sup> | AFM52001.1 | type I restriction enzyme R subunit      | Cytoplasmic | 7.50 |
| 331 | Mbov_0651 <sup>a,b</sup> | AFM52002.1 | type I restriction enzyme S subunit      | Unknown     |      |
| 332 | Mbov_0652 <sup>a,b</sup> | AFM52003.1 | type I restriction enzyme M protein      | Unknown     |      |
| 333 | Mbov_0654 <sup>a,b</sup> | AFM52005.1 | putative lipoprotein                     | Unknown     |      |

|     |                          |            |                                                                   |                     |       |
|-----|--------------------------|------------|-------------------------------------------------------------------|---------------------|-------|
| 334 | Mbov_0656 <sup>a,b</sup> | AFM52007.1 | putative lipoprotein                                              | Unknown             |       |
| 335 | Mbov_0658 <sup>a,b</sup> | AFM52009.1 | Periplasmic protease                                              | Unknown             |       |
| 336 | Mbov_0660 <sup>a,b</sup> | AFM52011.1 | glutamyl-tRNA synthetase                                          | Cytoplasmic         | 9.97  |
| 337 | Mbov_0661 <sup>a,b</sup> | AFM52012.1 | hypothetical protein Mbov_0661                                    | Unknown             |       |
| 338 | Mbov_0663 <sup>a,b</sup> | AFM52014.1 | S-adenosylmethionine synthetase                                   | Cytoplasmic         | 9.97  |
| 339 | Mbov_0665 <sup>a</sup>   | AFM52016.1 | signal recognition particle subunit                               | CytoplasmicMembrane | 8.78  |
| 340 | Mbov_0666 <sup>a,b</sup> | AFM52017.1 | putative acetyltransferase                                        | Unknown             |       |
| 341 | Mbov_0667 <sup>a,b</sup> | AFM52018.1 | Hypothetical protein Mbov_0667                                    | Unknown             |       |
| 342 | Mbov_0668 <sup>a,b</sup> | AFM52019.1 | nicotinate phosphoribosyltransferase                              | Cytoplasmic         | 7.50  |
| 343 | Mbov_0669 <sup>a,b</sup> | AFM52020.1 | phosphoglycerate kinase                                           | Cytoplasmic         | 9.97  |
| 344 | Mbov_0673 <sup>a,b</sup> | AFM52023.1 | leucyl aminopeptidase                                             | Cytoplasmic         | 9.67  |
| 345 | Mbov_0674 <sup>a,b</sup> | AFM52024.1 | putative lipoprotein                                              | Unknown             |       |
| 346 | Mbov_0675 <sup>a,b</sup> | AFM52025.1 | 5'nucleotidase                                                    | Cell wall           | 9.21  |
| 347 | Mbov_0676 <sup>a,b</sup> | AFM52026.1 | elongation factor                                                 | Cytoplasmic         | 9.97  |
| 348 | Mbov_0677 <sup>a,b</sup> | AFM52027.1 | 30S ribosomal protein                                             | Cytoplasmic         | 7.50  |
| 349 | Mbov_0678 <sup>a,b</sup> | AFM52028.1 | 30S ribosomal protein                                             | Cytoplasmic         | 9.67  |
| 350 | Mbov_0679 <sup>a,b</sup> | AFM52029.1 | hypothetical protein Mbov_0679                                    | Cytoplasmic         | 7.50  |
| 351 | Mbov_0680 <sup>a,b</sup> | AFM52030.1 | drug resistance ATPase ABC transporter family ATP-binding protein | Cytoplasmic         | 9.97  |
| 352 | Mbov_0687 <sup>a,b</sup> | AFM52036.1 | ATP-binding cassette subfamily B                                  | CytoplasmicMembrane | 9.99  |
| 353 | Mbov_0691 <sup>a,b</sup> | AFM52040.1 | endoglucanase                                                     | Cytoplasmic         | 7.50  |
| 354 | Mbov_0693 <sup>a,b</sup> | AFM52042.1 | putative transmembrane protein                                    | Extracellular       | 8.91  |
| 355 | Mbov_0694 <sup>a,b</sup> | AFM52043.1 | DNA-directed RNA polymerase subunit beta'                         | Cytoplasmic         | 9.97  |
| 356 | Mbov_0695 <sup>a,b</sup> | AFM52044.1 | DNA-directed RNA polymerase subunit beta                          | Cytoplasmic         | 9.97  |
| 357 | Mbov_0696 <sup>a,b</sup> | AFM52045.1 | putative lipoprotein                                              | Unknown             |       |
| 358 | Mbov_0697 <sup>a,b</sup> | AFM52046.1 | 50S ribosomal protein                                             | Cytoplasmic         | 9.67  |
| 359 | Mbov_0698 <sup>a,b</sup> | AFM52047.1 | 50S ribosomal protein                                             | Cytoplasmic         | 9.97  |
| 360 | Mbov_0700 <sup>a,b</sup> | AFM52049.1 | lysyl-tRNA synthetase                                             | Cytoplasmic         | 10.00 |
| 361 | Mbov_0701 <sup>a,b</sup> | AFM52050.1 | hypothetical protein Mbov_0701                                    | Cytoplasmic         | 7.50  |
| 362 | Mbov_0702 <sup>a,b</sup> | AFM52051.1 | Transcriptional accessory protein                                 | Cytoplasmic         | 7.50  |
| 363 | Mbov_0703 <sup>a,b</sup> | AFM52052.1 | Clp protease ATP-binding subunit                                  | Cytoplasmic         | 9.97  |
| 364 | Mbov_0710 <sup>a,b</sup> | AFM52059.1 | ribosomal protein small subunit S16                               | Cytoplasmic         | 9.97  |
| 365 | Mbov_0711 <sup>a,b</sup> | AFM52060.1 | tRNA-methyltransferase                                            | Cytoplasmic         | 7.50  |



|     |                          |            |                                                             |                     |       |
|-----|--------------------------|------------|-------------------------------------------------------------|---------------------|-------|
| 366 | Mbov_0712 <sup>a,b</sup> | AFM52061.1 | 50S ribosomal protein                                       | Cytoplasmic         | 9.97  |
| 367 | Mbov_0713 <sup>a,b</sup> | AFM52062.1 | methionyl-tRNA formyltransferase                            | Cytoplasmic         | 9.97  |
| 368 | Mbov_0715 <sup>a,b</sup> | AFM52064.1 | phosphotransferase system enzyme I                          | Cytoplasmic         | 9.97  |
| 369 | Mbov_0718 <sup>a</sup>   | AFM52067.1 | L-ribulose-5-phosphate 4-epimerase                          | Cytoplasmic         | 7.50  |
| 370 | Mbov_0719 <sup>a</sup>   | AFM52068.1 | L-ribulose-5-phosphate 3-epimerase                          | Cytoplasmic         | 7.50  |
| 371 | Mbov_0720 <sup>a,b</sup> | AFM52069.1 | 3-dehydro-L-gulonate-6-phosphate decarboxylase              | Cytoplasmic         | 7.50  |
| 372 | Mbov_0721 <sup>a</sup>   | AFM52070.1 | ascorbate-specific PTS system enzyme II Ccomponent          | Unknown             |       |
| 373 | Mbov_0722 <sup>a</sup>   | AFM52071.2 | ascorbate-specific PTS system enzyme II Bcomponent          | Unknown             |       |
| 374 | Mbov_0724 <sup>a</sup>   | AFM52073.1 | putative metal-dependent hydrolase with the TIM-barrel fold | CytoplasmicMembrane | 8.78  |
| 375 | Mbov_0725 <sup>a,b</sup> | AFM52074.1 | putative hydrolases of the HAD superfamily                  | Unknown             |       |
| 376 | Mbov_0732 <sup>a</sup>   | AFM52081.1 | putative lipoprotein                                        | Extracellular       | 8.91  |
| 377 | Mbov_0734 <sup>a</sup>   | AFM52083.1 | hypothetical protein Mbov_0734                              | Cytoplasmic         | 7.50  |
| 378 | Mbov_0739 <sup>a,b</sup> | AFM52087.1 | putative lipoprotein                                        | Unknown             |       |
| 379 | Mbov_0743 <sup>a,b</sup> | AFM52091.1 | putative transmembrane protein                              | Unknown             |       |
| 380 | Mbov_0745 <sup>a,b</sup> | AFM52093.1 | hypothetical protein Mbov_0745                              | Cytoplasmic         | 7.50  |
| 381 | Mbov_0746 <sup>a</sup>   | AFM52094.1 | NAD(+) synthetase [                                         | Cytoplasmic         | 7.50  |
| 382 | Mbov_0747 <sup>a,b</sup> | AFM52095.1 | Hypothetical protein Mbov_0747                              | Unknown             |       |
| 383 | Mbov_0749 <sup>a</sup>   | AFM52097.1 | methyltransferase                                           | Cytoplasmic         | 7.50  |
| 384 | Mbov_0750 <sup>a</sup>   | AFM52098.1 | DNA replication protein                                     | Unknown             |       |
| 385 | Mbov_0755 <sup>a,b</sup> | AFM52103.1 | putative adenine-specific DNA-methyltransferase             | Cytoplasmic         | 7.50  |
| 386 | Mbov_0758 <sup>a</sup>   | AFM52106.1 | putative ATPase                                             | Cytoplasmic         | 7.50  |
| 387 | Mbov_0760 <sup>a,b</sup> | AFM52108.1 | putative transmembrane protein                              | CytoplasmicMembrane | 10.00 |
| 388 | Mbov_0761 <sup>a,b</sup> | AFM52109.1 | ribosomal large subunit pseudouridine synthase D            | Cytoplasmic         | 9.97  |
| 389 | Mbov_0765 <sup>a,b</sup> | AFM52113.1 | hypothetical protein Mbov_0765                              | Cytoplasmic         | 7.50  |
| 390 | Mbov_0768 <sup>a,b</sup> | AFM52116.1 | chromosome segregation protein                              | Unknown             |       |
| 391 | Mbov_0771 <sup>a,b</sup> | AFM52119.1 | thymidylate kinase                                          | Cytoplasmic         | 7.50  |
| 392 | Mbov_0772 <sup>a,b</sup> | AFM52120.1 | recombination protein                                       | Cytoplasmic         | 7.50  |
| 393 | Mbov_0773 <sup>a,b</sup> | AFM52121.1 | Hypothetical protein Mbov_0773                              | Cytoplasmic         | 7.50  |
| 394 | Mbov_0774 <sup>a,b</sup> | AFM52122.1 | DNA polymerase III subunit gamma/tau                        | Cytoplasmic         | 9.97  |
| 395 | Mbov_0776 <sup>a,b</sup> | AFM52124.1 | phosphoglycerate mutase                                     | Cytoplasmic         | 9.97  |
| 396 | Mbov_0777 <sup>a,b</sup> | AFM52125.1 | putative hydrolases of the HAD superfamily                  | Cytoplasmic         | 7.50  |
| 397 | Mbov_0778 <sup>a,b</sup> | AFM52126.1 | putative transmembrane protein                              | CytoplasmicMembrane | 10.00 |
| 398 | Mbov_0779 <sup>a</sup>   | AFM52127.1 | putative transmembrane protein                              | CytoplasmicMembrane | 9.55  |

|     |                          |            |                                                   |                     |      |
|-----|--------------------------|------------|---------------------------------------------------|---------------------|------|
| 399 | Mbov_0783 <sup>a,b</sup> | AFM52131.1 | adenine phosphoribosyltransferase                 | Cytoplasmic         | 9.97 |
| 400 | Mbov_0784 <sup>a,b</sup> | AFM52132.1 | translation initiation factor                     | Cytoplasmic         | 9.97 |
| 401 | Mbov_0786 <sup>a,b</sup> | AFM52134.1 | transcription elongation factor                   | Cytoplasmic         | 7.50 |
| 402 | Mbov_0787 <sup>a,b</sup> | AFM52135.1 | hypothetical protein Mbov_0787                    | Cytoplasmic         | 7.50 |
| 403 | Mbov_0788 <sup>a,b</sup> | AFM52136.1 | thymidine kinase                                  | Cytoplasmic         | 9.97 |
| 404 | Mbov_0789 <sup>a,b</sup> | AFM52137.1 | leucyl aminopeptidase                             | Cytoplasmic         | 9.64 |
| 405 | Mbov_0793 <sup>a,b</sup> | AFM52141.1 | variable surface lipoprotein VspHB0801-1          | Unknown             |      |
| 406 | Mbov_0794 <sup>a,b</sup> | AFM52142.1 | variable surface lipoprotein VspHB0801-2          | CytoplasmicMembrane | 9.87 |
| 407 | Mbov_0795 <sup>a</sup>   | AFM52143.1 | variable surface lipoprotein VspHB0801-3          | CytoplasmicMembrane | 9.87 |
| 408 | Mbov_0796 <sup>a,b</sup> | AFM52144.1 | variable surface lipoprotein VspHB0801-4          | Unknown             |      |
| 409 | Mbov_0797 <sup>a,b</sup> | AFM52145.1 | variable surface lipoprotein VspHB0801-5          | Unknown             |      |
| 410 | Mbov_0798 <sup>a,b</sup> | AFM52146.1 | variable surface lipoprotein VspHB0801-6          | Unknown             |      |
| 411 | Mbov_0802 <sup>a,b</sup> | AFM52150.1 | ribonuclease J                                    | Cytoplasmic         | 7.50 |
| 412 | Mbov_0804 <sup>a,b</sup> | AFM52152.2 | hypothetical protein Mbov_0804                    | Unknown             |      |
| 413 | Mbov_0806 <sup>a,b</sup> | AFM52154.1 | aspartyl/glutamyl-tRNA amidotransferase subunit B | Cytoplasmic         | 7.50 |
| 414 | Mbov_0807 <sup>a,b</sup> | AFM52155.1 | aspartyl/glutamyl-tRNA amidotransferase subunit A | Cytoplasmic         | 9.67 |
| 415 | Mbov_0808 <sup>a,b</sup> | AFM52156.1 | aspartyl/glutamyl-tRNA amidotransferase subunit C | Cytoplasmic         | 7.50 |
| 316 | Mbov_0810 <sup>a,b</sup> | AFM52158.1 | segregation and condensation protein              | Cytoplasmic         | 9.97 |
| 417 | Mbov_0811 <sup>a,b</sup> | AFM52159.1 | segregation and condensation protein              | Cytoplasmic         | 9.97 |
| 418 | Mbov_0813 <sup>a,b</sup> | AFM52161.1 | holo-[acyl-carrier protein] synthase              | Cytoplasmic         | 7.50 |
| 419 | Mbov_0814 <sup>a,b</sup> | AFM52162.1 | GTP-binding protein                               | Cytoplasmic         | 9.97 |
| 420 | Mbov_0815 <sup>a,b</sup> | AFM52163.1 | cytidylate kinase                                 | Cytoplasmic         | 9.97 |
| 421 | Mbov_0817 <sup>a,b</sup> | AFM52165.1 | heat shock protein                                | Cytoplasmic         | 9.67 |
| 422 | Mbov_0818 <sup>a,b</sup> | AFM52166.2 | ribosome-binding factor A                         | Cytoplasmic         | 9.67 |
| 423 | Mbov_0819 <sup>a,b</sup> | AFM52167.1 | tyrosyl-tRNA synthetase                           | Cytoplasmic         | 9.97 |
| 424 | Mbov_0820 <sup>a,b</sup> | AFM52168.1 | EMAP domain protein                               | Cytoplasmic         | 9.67 |
| 425 | Mbov_0821 <sup>a,b</sup> | AFM52169.1 | hypothetical protein Mbov_0821                    | Unknown             |      |
| 426 | Mbov_0822 <sup>a,b</sup> | AFM52170.1 | Acyl carrier protein                              | Unknown             |      |
| 427 | Mbov_0823 <sup>a,b</sup> | AFM52171.1 | protoporphirogen oxidase HEMK                     | Cytoplasmic         | 7.50 |
| 428 | Mbov_0824 <sup>a,b</sup> | AFM52172.2 | peptide chain release factor                      | Cytoplasmic         | 9.97 |
| 429 | Mbov_0825 <sup>a,b</sup> | AFM52173.1 | cell filamentation protein                        | Cytoplasmic         | 7.50 |
| 430 | Mbov_0831 <sup>a,b</sup> | AFM52176.1 | DNA gyrase subunit B                              | Cytoplasmic         | 9.67 |
| 431 | Mbov_0832 <sup>a,b</sup> | AFM52177.1 | Thioredoxin                                       | Cytoplasmic         | 9.67 |
| 432 | Mbov_0833 <sup>a</sup>   | AFM52178.1 | SsrA-binding protein                              | Unknown             |      |

|     |                          |            |                                       |                     |       |
|-----|--------------------------|------------|---------------------------------------|---------------------|-------|
| 433 | Mbov_0838 <sup>a,b</sup> | AFM52183.1 | putative lipoprotein                  | Unknown             |       |
| 434 | Mbov_0839 <sup>a</sup>   | AFM52184.1 | LacI family transcriptional regulator | Cytoplasmic         | 9.97  |
| 435 | Mbov_0843 <sup>a</sup>   | AFM52188.1 | ABC transporter ATP-binding protein   | CytoplasmicMembrane | 9.51  |
| 436 | Mbov_0845 <sup>a,b</sup> | AFM52189.1 | cell division protease                | CytoplasmicMembrane | 10.00 |
| 437 | Mbov_0847 <sup>a,b</sup> | AFM52191.1 | peptidyl-tRNA hydrolase               | Cytoplasmic         | 9.97  |
| 438 | Mbov_0848 <sup>a</sup>   | AFM52192.1 | exodeoxyribonuclease V alpha subunit  | Cytoplasmic         | 7.50  |

a: related to *M. bovis* HB0801-P1, b: related to P150 and a,b: related to both (*M. bovis* HB0801-P1, and P150).

**Table S3** A total of 59 extracellular proteins were identified from *M. bovis* secretome by using PRID-LIPO signal peptide prediction

| No | Proteins ID             |              |                                                        | Signal peptides               |                 |       |
|----|-------------------------|--------------|--------------------------------------------------------|-------------------------------|-----------------|-------|
|    | Mnemonic                | Accession No | Protein Name                                           | Signal peptide                | aa              | Re    |
| 1  | Mbov_0016 <sup>ab</sup> | AFM51394_1   | P48-like surface lipoprotein                           | Lipo signal peptide predicted | 1 - 24 [AAS-CG] | 1.000 |
| 2  | Mbov_0037 <sup>ab</sup> | AFM51415_2   | oligopeptide ABC transporter substrate-binding protein | Lipo signal peptide predicted | 1 - 26 [AAK-CG] | 0.880 |
| 3  | Mbov_0038 <sup>ab</sup> | AFM51416_1   | putative transmembrane protein                         | TM segment predicted          | 14 - 35         | 0.696 |
| 4  | Mbov_0049 <sup>ab</sup> | AFM51424_1   | putative lipoprotein                                   | Lipo signal peptide predicted | 1 - 22 [SSS-CF] | 0.711 |
| 5  | Mbov_0111 <sup>ab</sup> | AFM51486_1   | putative lipoprotein                                   | Lipo signal peptide predicted | 1 - 27 [AAR-CQ] | 0.915 |
| 6  | Mbov_0154 <sup>ab</sup> | AFM51527_1   | putative transmembrane protein                         | TM segment predicted:         | 9 - 30          | 0.739 |
| 7  | Mbov_0156 <sup>ab</sup> | AFM51529_1   | putative lipoprotein                                   | Lipo signal peptide predicted | 1 - 25 [AAK-CV] | 0.978 |
| 8  | Mbov_0211 <sup>b</sup>  | AFM51580_1   | Endonuclease I                                         | Lipo signal peptide predicted | 1 - 32 [STG-CN] | 0.998 |
| 9  | Mbov_0217 <sup>ab</sup> | AFM51586_1   | putative lipoprotein                                   | Lipo signal peptide predicted | 1 - 26 [SAK-CG] | 0.956 |
| 10 | Mbov_0274 <sup>a</sup>  | AFM51642_1   | putative lipoprotein                                   | Lipo signal peptide predicted | 1 - 23 [AAS-CQ] | 1.000 |

|    |                         |            |                                                |                               |                 |       |
|----|-------------------------|------------|------------------------------------------------|-------------------------------|-----------------|-------|
| 11 | Mbov_0283 <sup>b</sup>  | AFM51651_1 | putative lipoprotein                           | Sec signal peptide predicted  | 1 - 31 [AKA-DN] | 0.982 |
| 12 | Mbov_0290 <sup>b</sup>  | AFM51658_1 | putative lipoprotein                           | Lipo signal peptide predicted | 1 - 20 [AAA-CD] | 0.999 |
| 13 | Mbov_0296 <sup>b</sup>  | AFM51664_1 | putative lipoprotein                           | Sec signal peptide predicted  | 1 - 25 [AKC-FG] | 0.919 |
| 14 | Mbov_0326 <sup>b</sup>  | AFM51694_1 | putative secreted acid phosphatase             | Lipo signal peptide predicted | 1 - 26 [AAT-CE] | 0.840 |
| 15 | Mbov_0339 <sup>b</sup>  | AFM51707_1 | variable surface lipoprotein VspY1             | Lipo signal peptide predicted | 1 - 23 [AAS-CD] | 0.993 |
| 16 | Mbov_0341 <sup>b</sup>  | AFM51709_1 | putative transmembrane protein                 | Sec signal peptide predicted  | 1 - 32 [PFG-DK] | 0.916 |
| 17 | Mbov_0350 <sup>ab</sup> | AFM51716_1 | putative lipoprotein                           | Sec signal peptide predicted  | 1 - 27 [SIS-KP] | 0.800 |
| 18 | Mbov_0364 <sup>ab</sup> | AFM51726_1 | putative membrane lipoprotein                  | Sec signal peptide predicted  | 1 - 23 [AIA-VP] | 0.995 |
| 19 | Mbov_0368 <sup>b</sup>  | AFM51730_1 | putative transmembrane protein                 | Sec signal peptide predicted  | 1 - 33 [VIK-SN] | 0.967 |
| 20 | Mbov_0374 <sup>b</sup>  | AFM51736_1 | putative lipoprotein                           | Lipo signal peptide predicted | 1 - 28 [VLS-CT] | 0.539 |
| 21 | Mbov_0393 <sup>ab</sup> | AFM51750_1 | putative membrane lipoprotein (ICEB-1 encoded) | TM segment predicted          | 6 - 28          | 0.925 |

|    |                         |            |                                |                                     |                 |       |
|----|-------------------------|------------|--------------------------------|-------------------------------------|-----------------|-------|
| 22 | Mbov_0449 <sup>ab</sup> | AFM51806_2 | putative membrane lipoprotein  | Sec signal<br>peptide<br>predicted  | 1 - 31 [LIA-AK] | 0.981 |
| 23 | Mbov_0458 <sup>ab</sup> | AFM51815_1 | variable surface lipoprotein   | Lipo signal<br>peptide<br>predicted | 1 - 24 [ATS-CG] | 0.999 |
| 24 | Mbov_0461 <sup>ab</sup> | AFM51818_1 | putative membrane lipoprotein  | Sec signal<br>peptide<br>predicted  | 1 - 24 [VVA-AS] | 0.949 |
| 25 | Mbov_0462 <sup>ab</sup> | AFM51819_1 | Putative lipoprotein           | Lipo signal<br>peptide<br>predicted | 1 - 26 [AAS-CD] | 0.891 |
| 26 | Mbov_0467 <sup>b</sup>  | AFM51823_1 | putative transmembrane protein | TM segment<br>predicted             | 6 - 27          | 0.876 |
| 27 | Mbov_0468 <sup>ab</sup> | AFM51824_1 | putative lipoprotein           | Lipo signal<br>peptide<br>predicted | 1 - 24 [LTS-CS] | 1.000 |
| 28 | Mbov_0469 <sup>ab</sup> | AFM51825_1 | variable lipoprotein VspX      | Lipo signal<br>peptide<br>predicted | 1 - 25 [AAS-CG] | 1.000 |
| 29 | Mbov_0471 <sup>ab</sup> | AFM51827_1 | Periplasmic protease           | Sec signal<br>peptide<br>predicted  | 1 - 32 [ADF-DE] | 0.921 |
| 30 | Mbov_0473 <sup>ab</sup> | AFM51829_1 | putative lipoprotein           | Lipo signal<br>peptide<br>predicted | 1 - 26 [AAS-CE] | 1.000 |
| 31 | Mbov_0505 <sup>ab</sup> | AFM51861_1 | putative lipoprotein           | Sec signal<br>peptide<br>predicted  | 1 - 33 [AYN-IS] | 0.925 |
| 32 | Mbov_0515 <sup>ab</sup> | AFM51869_1 | putative lipoprotein           | Lipo signal<br>peptide<br>predicted | 1 - 25 [AAK-CN] | 0.974 |

|    |                         |            |                                |                               |                 |       |
|----|-------------------------|------------|--------------------------------|-------------------------------|-----------------|-------|
| 33 | Mbov_0516 <sup>ab</sup> | AFM51870_1 | Putative transmembrane protein | Sec signal peptide predicted  | 1 - 32 [IYN-AS] | 0.982 |
| 34 | Mbov_0517 <sup>ab</sup> | AFM51871_1 | Putative transmembrane protein | Sec signal peptide predicted  | 1 - 32 [IYK-AT] | 0.979 |
| 35 | Mbov_0518 <sup>b</sup>  | AFM51872_1 | putative lipoprotein           | Sec signal peptide predicted  | 1 - 22 [LIA-AK] | 0.947 |
| 36 | Mbov_0519 <sup>ab</sup> | AFM51873_1 | Putative transmembrane protein | TM segment predicted          | 11 - 31         | 0.591 |
| 37 | Mbov_0536 <sup>ab</sup> | AFM51890_1 | putative lipoprotein           | Lipo signal peptide predicted | 1 - 23 [LAS-CE] | 0.974 |
| 38 | Mbov_0537 <sup>ab</sup> | AFM51891_1 | putative lipoprotein           | Lipo signal peptide predicted | 1 - 23 [SVS-CI] | 0.884 |
| 39 | Mbov_0570 <sup>ab</sup> | AFM51924_1 | putative lipoprotein           | Lipo signal peptide predicted | 1 - 27 [SAR-CN] | 0.927 |
| 40 | Mbov_0579 <sup>ab</sup> | AFM51933_1 | membrane lipoprotein P81       | Lipo signal peptide predicted | 1 - 25 [SAK-CG] | 0.961 |
| 41 | Mbov_0580 <sup>ab</sup> | AFM51934_1 | Nuclease                       | Sec signal peptide predicted  | 1 - 33 [IKA-KE] | 0.993 |
| 42 | Mbov_0585 <sup>ab</sup> | AFM51939_1 | putative lipoprotein           | Sec signal peptide predicted  | 1 - 27 [ASC-IH] | 0.948 |
| 43 | Mbov_0654 <sup>ab</sup> | AFM52005_1 | putative lipoprotein           | Lipo signal peptide predicted | 1 - 25 [AAS-CE] | 0.993 |

|    |                         |            |                                          |                               |                 |       |
|----|-------------------------|------------|------------------------------------------|-------------------------------|-----------------|-------|
| 44 | Mbov_0656 <sup>ab</sup> | AFM52007_1 | putative lipoprotein (variable)          | No signal peptide predicted   |                 | 0.559 |
| 45 | Mbov_0658 <sup>ab</sup> | AFM52009_1 | Periplasmic protease                     | Sec signal peptide predicted  | 1 - 28 [SNS-NS] | 0.984 |
| 46 | Mbov_0674 <sup>ab</sup> | AFM52024_1 | putative lipoprotein                     | TM segment predicted          | 18 - 39         | 0.973 |
| 47 | Mbov_0675 <sup>ab</sup> | AFM52025_1 | 5'nucleotidase                           | Lipo signal peptide predicted | 1 - 24 [AAT-CG] | 0.965 |
| 48 | Mbov_0693 <sup>ab</sup> | AFM52042_1 | putative transmembrane protein           | TM segment predicted          | 9 - 30          | 0.684 |
| 49 | Mbov_0696 <sup>ab</sup> | AFM52045_1 | putative lipoprotein                     | Sec signal peptide predicted  | 1 - 31 [NSA-SE] | 0.988 |
| 50 | Mbov_0732 <sup>a</sup>  | AFM52081_1 | putative lipoprotein                     | No signal peptide predicted   |                 | 1.000 |
| 51 | Mbov_0739 <sup>ab</sup> | AFM52087_1 | putative lipoprotein                     | Lipo signal peptide predicted | 1 - 23 [VVA-CG] | 1.000 |
| 52 | Mbov_0743 <sup>ab</sup> | AFM52091_1 | putative transmembrane protein           | TM segment predicted:         | 17 - 34         | 0.576 |
| 53 | Mbov_0768 <sup>ab</sup> | AFM52116_1 | chromosome segregation protein           | Sec signal peptide predicted  | 1 - 24 [VFV-AV] | 0.955 |
| 54 | Mbov_0793 <sup>ab</sup> | AFM52141_1 | variable surface lipoprotein VspHB0801-1 | Lipo signal peptide predicted | 1 - 24 [AAK-CG] | 0.998 |
| 55 | Mbov_0794 <sup>ab</sup> | AFM52142_1 | variable surface lipoprotein VspHB0801-2 | Lipo signal peptide predicted | 1 - 24 [AAK-CG] | 0.998 |



|    |                          |            |                                          |                                |                 |       |
|----|--------------------------|------------|------------------------------------------|--------------------------------|-----------------|-------|
| 56 | Mbov_0795 <sup>a</sup>   | AFM52143_1 | variable surface lipoprotein VspHB0801-3 | Lipo signal peptide predicted  | 1 - 24 [AAK-CG] | 0.998 |
| 57 | Mbov_0796 <sup>a,b</sup> | AFM52144_1 | variable surface lipoprotein VspHB0801-4 | Lipo signal peptide predicted  | 1 - 24 [AAK-CG] | 0.998 |
| 58 | Mbov_0797 <sup>a,b</sup> | AFM52145_1 | variable surface lipoprotein VspHB0801-5 | Lipo signal peptide predicted  | 1 - 24 [AAK-CG] | 0.998 |
| 59 | Mbov_0798 <sup>a,b</sup> | AFM52146_1 | variable surface lipoprotein VspHB0801-6 | Lipo signal peptide predicted. | 1 - 24 [AAK-CG] | 0.998 |

a: related to *M. bovis* HB0801-P1, b: related to P150 and a,b: related to both (*M. bovis* HB0801-P1, and P150).

**Table S4** Identification of linear B-cell epitopes of *M. bovis* secreted proteins.

| No | Proteins                 |              | B cell epitopes                  |              |
|----|--------------------------|--------------|----------------------------------|--------------|
|    | Mnemonic                 | Accession No | Over all B cell epitopes Numbers | Image length |
| 1  | Mbov_0016 <sup>a,b</sup> | AFM51394_1   | 22                               | 23           |
| 2  | Mbov_0038 <sup>a,b</sup> | AFM51416_1   | 161                              | 30           |
| 3  | Mbov_0049 <sup>a,b</sup> | AFM51424_1   | 34                               | 64           |
| 4  | Mbov_0111 <sup>a,b</sup> | AFM51486_1   | 53                               | 31           |
| 5  | Mbov_0154 <sup>a,b</sup> | AFM51527_1   | 24                               | 20           |
| 6  | Mbov_0156 <sup>a,b</sup> | AFM51529_1   | 14                               | 29           |
| 7  | Mbov_0217 <sup>a,b</sup> | AFM51586_1   | 21                               | 30           |
| 8  | Mbov_0274 <sup>a</sup>   | AFM51642_1   | 35                               | 17           |
| 9  | Mbov_0283 <sup>b</sup>   | AFM51651_1   | 6                                | 107          |
| 10 | Mbov_0290 <sup>b</sup>   | AFM51658_1   | 26                               | 29           |
| 11 | Mbov_0296 <sup>b</sup>   | AFM51664_1   | 30                               | 12           |
| 12 | Mbov_0339 <sup>b</sup>   | AFM51707.1   | 7                                | 185          |
| 13 | Mbov_0350 <sup>a,b</sup> | AFM51716_1   | 36                               | 64           |
| 14 | Mbov_0364 <sup>a,b</sup> | AFM51726_1   | 25                               | 24           |
| 15 | Mbov_0368 <sup>b</sup>   | AFM51730_1   | 14                               | 29           |
| 16 | Mbov_0374 <sup>b</sup>   | AFM51736_1   | 38                               | 40           |
| 17 | Mbov_0449 <sup>a,b</sup> | AFM51806_2   | 12                               | 73           |
| 18 | Mbov_0458 <sup>a,b</sup> | AFM51815_1   | 6                                | 159          |
| 19 | Mbov_0461 <sup>a,b</sup> | AFM51818_1   | 5                                | 27           |
| 20 | Mbov_0462 <sup>a,b</sup> | AFM51819_1   | 8                                | 80           |
| 21 | Mbov_0468 <sup>a,b</sup> | AFM51824_1   | 24                               | 60           |
| 22 | Mbov_0469 <sup>a,b</sup> | AFM51825_1   | 4                                | 93           |
| 23 | Mbov_0471 <sup>a,b</sup> | AFM51827_1   | 30                               | 22           |
| 24 | Mbov_0473 <sup>a,b</sup> | AFM51829_1   | 9                                | 73           |
| 25 | Mbov_0505 <sup>a,b</sup> | AFM51861_1   | 38                               | 53           |
| 26 | Mbov_0515 <sup>a,b</sup> | AFM51869_1   | 52                               | 34           |
| 27 | Mbov_0516 <sup>a,b</sup> | AFM51870_1   | 46                               | 55           |
| 28 | Mbov_0517 <sup>a,b</sup> | AFM51871_1   | 42                               | 28           |
| 29 | Mbov_0518 <sup>b</sup>   | AFM51872_1   | 45                               | 23           |
| 30 | Mbov_0519 <sup>a,b</sup> | AFM51873_1   | 41                               | 34           |

|    |                          |            |    |     |
|----|--------------------------|------------|----|-----|
| 31 | Mbov_0536 <sup>a,b</sup> | AFM51890_1 | 19 | 19  |
| 32 | Mbov_0537 <sup>a,b</sup> | AFM51891_1 | 13 | 114 |
| 33 | Mbov_0570 <sup>a,b</sup> | AFM51924_1 | 34 | 26  |
| 34 | Mbov_0579 <sup>a,b</sup> | AFM51933_1 | 39 | 21  |
| 35 | Mbov_0580 <sup>a,b</sup> | AFM51934_1 | 18 | 20  |
| 36 | Mbov_0585 <sup>a,b</sup> | AFM51939_1 | 18 | 38  |
| 37 | Mbov_0654 <sup>a,b</sup> | AFM52005_1 | 5  | 132 |
| 38 | Mbov_0656 <sup>a,b</sup> | AFM52007_1 | 5  | 129 |
| 39 | Mbov_0658 <sup>a,b</sup> | AFM52009_1 | 29 | 45  |
| 40 | Mbov_0674 <sup>a,b</sup> | AFM52024_1 | 18 | 48  |
| 41 | Mbov_0675 <sup>a,b</sup> | AFM52025_1 | 36 | 30  |
| 42 | Mbov_0696 <sup>a,b</sup> | AFM52045_1 | 6  | 57  |
| 43 | Mbov_0739 <sup>a,b</sup> | AFM52087_1 | 38 | 19  |
| 44 | Mbov_0743 <sup>a,b</sup> | AFM52091_1 | 48 | 23  |
| 45 | Mbov_0768 <sup>a,b</sup> | AFM52116_1 | 15 | 15  |
| 46 | Mbov_0793 <sup>a,b</sup> | AFM52141_1 | 0  | Nil |
| 47 | Mbov_0794 <sup>a,b</sup> | AFM52142_1 | 1  | 145 |
| 48 | Mbov_0796 <sup>a,b</sup> | AFM52144_1 | 15 | 60  |
| 49 | Mbov_0797 <sup>a,b</sup> | AFM52145_1 | 5  | 168 |
| 50 | Mbov_0798 <sup>a,b</sup> | AFM52146_1 | 22 | 21  |

---

a: related to *M. bovis* HB0801-P1, b: related to P150 and a,b: related to both (*M. bovis* HB0801-P1, and P150).

**Table S5** Identification of affinity of T cell epitopes to MHC class I (nine-mers) of *M. bovis* secreted proteins by using IEDB-AR.

| No | Proteins                 |              | Intermediate affinity binding |          | High affinity binding |          |
|----|--------------------------|--------------|-------------------------------|----------|-----------------------|----------|
|    | Mnemonic                 | Accession No | Sequence                      | Position | Sequence              | Position |
| 1  | Mbov_0016 <sup>a,b</sup> | AFM51394_1   | AAPVLSVPL                     | 12-20    |                       |          |
|    |                          |              | AVYNVLADL                     | 349-357  |                       |          |
|    |                          |              | CGFTHKAAL                     | 139-147  |                       |          |
|    |                          |              | KYVGVATSG                     | 392-400  |                       |          |
|    |                          |              | YYESKKA EI                    | 420-428  |                       |          |
|    |                          |              | GEPVAVAAI                     | 280-288  | GENEASKYV             | 386-394  |
|    |                          |              | GEPAAKAFV                     | 179-187  | FDTKQAAYI             | 200-208  |
|    |                          |              | ASYPVAGSL                     | 296-304  | IPWPAVSDF             | 236-244  |
|    |                          |              | SSFRYIVLC                     | 131-139  | LEPEYIKKI             | 150-158  |
|    |                          |              | LYSQGENSL                     | 357-365  | TEVDGVKTV             | 33-41    |
|    |                          |              | AAYIAGRAL                     | 205-213  | KSLNNTIEL             | 265-273  |
|    |                          |              | KYYESKKA E                    | 419-427  |                       |          |
|    |                          |              | RIFTSVMKL                     | 337-345  |                       |          |
|    |                          |              | AAPVLSVPL                     | 12-20    |                       |          |
|    |                          |              | NDEIANKAL                     | 406-414  |                       |          |
|    |                          |              | KFYFLGAA                      | 5-13     |                       |          |
|    |                          |              | NEASKYVGV                     | 388-396  |                       |          |

2 Mbov\_0038<sup>a,b</sup> AFM51416\_1

|            |           |           |           |
|------------|-----------|-----------|-----------|
| YDKNAVKFV  | 2409-2417 |           |           |
| SFNNSSTSL  | 1059-1067 |           |           |
| SELISVETL  | 752-760   |           |           |
| TEFYAYSKF  | 793-801   |           |           |
| LETAFAADPF | 2598-2606 | IEDLTSRFI | 419-427   |
| AEDDEGKTI  | 912-920   | FEAELSVFL | 1287-1295 |
| KELTSYKTL  | 1719-1727 | SEPELRKFL | 224-232   |
| ANIGKYNAL  | 233-241   | YSLENGKYL | 2084-2092 |
| DEAELKNIF  | 50-58     | SALLNSSL  | 1402-1410 |
| EKEYKADAL  | 3028-3036 | TAPINGEVL | 1820-1828 |
| LESNLFKEL  | 1302-1310 | IMRRFSSL  | 2795-2803 |
| KYAISGGVL  | 13-21     | LYLKARTHV | 2173-2181 |
| FPDTSKADF  | 2658-2666 | FDMWVINAI | 2286-2294 |
| FEEVIKGL   | 2350-2358 | YSNVNGIEV | 1597-1605 |
| WEIGAEDTI  | 2851-2859 | GEWLEGLHI | 2064-2072 |
| FAMFNSALT  | 2804-2812 | QYIEAVSPI | 126-134   |
| INEQFFRGI  | 249-257   | SSIMNDAIV | 1445-1453 |
| NEFEKLTCL  | 930-938   | NESINNKS  | 1537-1545 |
| SYFGEFQSI  | 3060-3068 | KEIELGNKI | 961-969   |
| YSPSNHDFG  | 2962-2970 | VEQDIDKSI | 1839-1847 |
| SSYTIHNAF  | 375-383   | TEFNKKFNI | 1684-1692 |
| AETVINITI  | 526-534   | NYAGARKAI | 477-485   |
| YVYDQFNGV  | 3317-3325 | RGITNVRYL | 255-263   |
| KAITLVDSL  | 2874-2882 | GEVLFNSFV | 1825-1833 |
| LNWRDFYNL  | 769-777   | SEETLKNSL | 440-448   |
| TERKFNELF  | 2934-2942 | SENTSSNIL | 2514-2522 |
| FSIVKGVEM  | 159-167   | KEYTTIKFF | 182-190   |
| KYIQFDKAL  | 404-412   | KYYAKHHAL | 103-111   |
| IMSKYRNAL  | 3241-3249 | NELSNKFGI | 658-666   |
| SETKFGSKF  | 1981-1989 | VELGTRKLL | 2181-2189 |
| KNLNKYIQF  | 400-408   | WETKTNRDI | 1737-1745 |
| TVTNNMFSNI | 2472-2480 |           |           |
| NSLAKFSEL  | 446-454   |           |           |
| FPDAFFGTL  | 190-198   |           |           |

|           |           |
|-----------|-----------|
| VALQQYELV | 2899-2907 |
| YNSTFLMQL | 1022-1030 |
| IEFYKFTEW | 134-142   |
| MFYYKTQNI | 3183-3191 |
| KVYEHILYV | 3310-3318 |
| VAYLPSELI | 747-755   |
| KYDKNSDTV | 2725-2733 |
| SVFLNYKNT | 1292-1300 |
| FDDGSSYTI | 371-379   |
| YEGLTDELL | 2049-2057 |
| NEIVDKALL | 360-368   |
| KELNRLKRV | 1308-1316 |
| NMPSFLSNI | 2971-2979 |
| IYENPRYYI | 2530-2538 |
| DYAAQYSSL | 1093-1101 |
| NEKLGRKNF | 40-48     |
| LSFLSSQNV | 1035-1043 |
| DYVNSKVDI | 2738-2746 |
| NEDYAAQYS | 1091-1099 |
| TMYMPNVKL | 2590-2598 |
| KYYAKHHAL | 103-111   |
| IEAELSKFK | 1801-1809 |
| EYAEIYNNL | 1381-1389 |
| YTYNFAEVI | 2945-2953 |
| RQITNENDV | 1911-1919 |
| IEFEDYKKW | 2705-2713 |
| IDILTKKKI | 1929-1937 |
| VEGIRKNQL | 1889-1897 |
| VSPIEFYKF | 131-139   |
| HEYGHHITL | 2127-2135 |
| SALLNSSL  | 1402-1410 |
| ITLKSFSIV | 154-162   |
| SDEQGTKDI | 3262-3270 |
| FEKLTKLLA | 932-940   |

|           |           |
|-----------|-----------|
| TYKLNKSVL | 215-223   |
| FSLLYSEVL | 871-879   |
| NYTESLKRL | 2675-2683 |
| NMNEFFSVL | 2005-2013 |
| NPNGIWNML | 2641-2649 |
| KYQAAWVTS | 1747-1755 |
| FSNIYKNYL | 2477-2485 |
| VDLKAITLV | 2871-2879 |
| AYNHSLTHS | 1877-1885 |
| SDVERNRLV | 286-294   |
| IVRRLGRNL | 1566-1574 |
| NYNNTNEIV | 355-363   |
| YEAYNHSLT | 1875-1883 |
| TYLNYKDEL | 1345-1353 |
| DYINKRKDI | 1773-1781 |
| TYLQALTVE | 1788-1796 |
| AMFNSALTF | 2805-2813 |
| TEWFMKNVS | 140-148   |
| SYFGEFQSI | 3060-3068 |
| LNLRYKKAV | 3036-3044 |
| GSFNFYNQY | 119-127   |
| IIVEQYKVL | 1516-1524 |
| LYEAYNHSL | 1874-1882 |
| SKFKKLPQL | 1806-1814 |
| EETLKNSLA | 441-449   |
| SVPEFLKKF | 1544-1552 |
| KNMNEFFSV | 2004-2012 |
| FYNQYIEAV | 123-131   |
| YYINRNNSS | 2536-2544 |
| KAIEDADKL | 483-491   |
| TVFDTTQQL | 716-724   |
| EWLTLRQTI | 460-468   |
| SERANVASF | 1424-1432 |
| ISTDFLKfV | 2116-2124 |

3 Mbov\_0049<sup>a,b</sup> AFM51424\_1

EKVKTESI 496-504  
SVYEHEQTL 655-663  
EEKRLADEV 207-215  
EESKTLKRL 517-525  
TENFSDSFF 530-538  
VSSSCFNNI 19-27  
HEYYSAAHT 313-321  
GEVVVTFSV 104-112  
EYYSAAHTK 314-322  
IEKLTAEKL 346-354  
VEEALTRQM 292-300  
SYESQLVQV 377-385  
FPLVSSSCF 16-24  
IEKLQEFIL 639-647  
LMHEYYSAA 311-319  
FDDEYTDLV 284-292  
RESYESQLV 375-383  
FEYEDLEEL 704-712  
EEALTRQMY 293-301  
NNRVFWAEV 225-233  
NHNNSNRPI 165-173  
QDAYFKGLM 304-312  
VKVVNLGEI 48-56

YEEKALLV 389-397  
FEKQKMNLL 684-692  
KYQSSEATM 273-281  
KAYIYCELL 583-591  
NEGFNHQII 544-552  
YESQLVQVV 378-386  
LEELKLEEI 709-717  
YEHEQTLEL 657-665

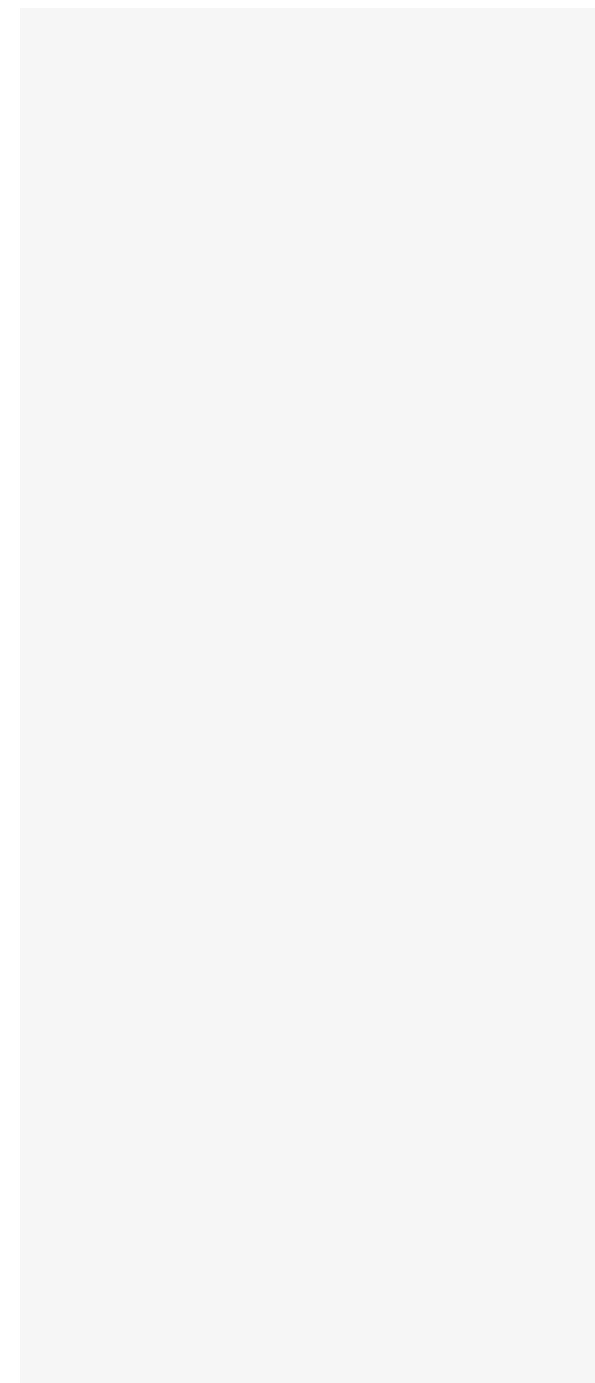



4 Mbov\_0111<sup>a,b</sup> AFM51486\_1

NENIFKTAV 479-487  
SVWRYKLEL 141-149  
AGRYYYAGW 425-433  
NWEYLAKYI 600-608  
KEALFSPIV 119-127  
IYQATSTDA 195-203  
LELGSKVIV 147-155  
SEYSFDGSV 91-99  
ASHTSYANF 764-772  
NEHFAKLAF 556-564  
NPTTSPYQF 528-536  
SAVGLATPL 15-23  
RPAVSEYSF 87-95  
GYESGESKV 61-69  
FEVVKGQKW 223-231  
VKYANSLPL 894-902  
WIPDLYMAL 734-742  
TAVAFRTL I 587-595  
SLIAPNTAI 618-626  
SIATFKNPI 187-195  
LAFAPQSL L 496-504  
YEVVAKDFY 241-249  
YYYAGWNPS 428-436  
VKYANSLPL 894-902  
YYSWLRTTG 249-257  
LYMALDPRL 738-746  
KIGLYWYGF 409-417  
NDFLRGKLA 489-497  
YYGRVPEPA 915-923  
SEYSFDGSV 91-99

TSYANFASI 767-775  
LESAQGILI 109-117  
NSAINWEYL 596-604  
PYQFLTSYI 533-541  
TSYANFASI 767-775

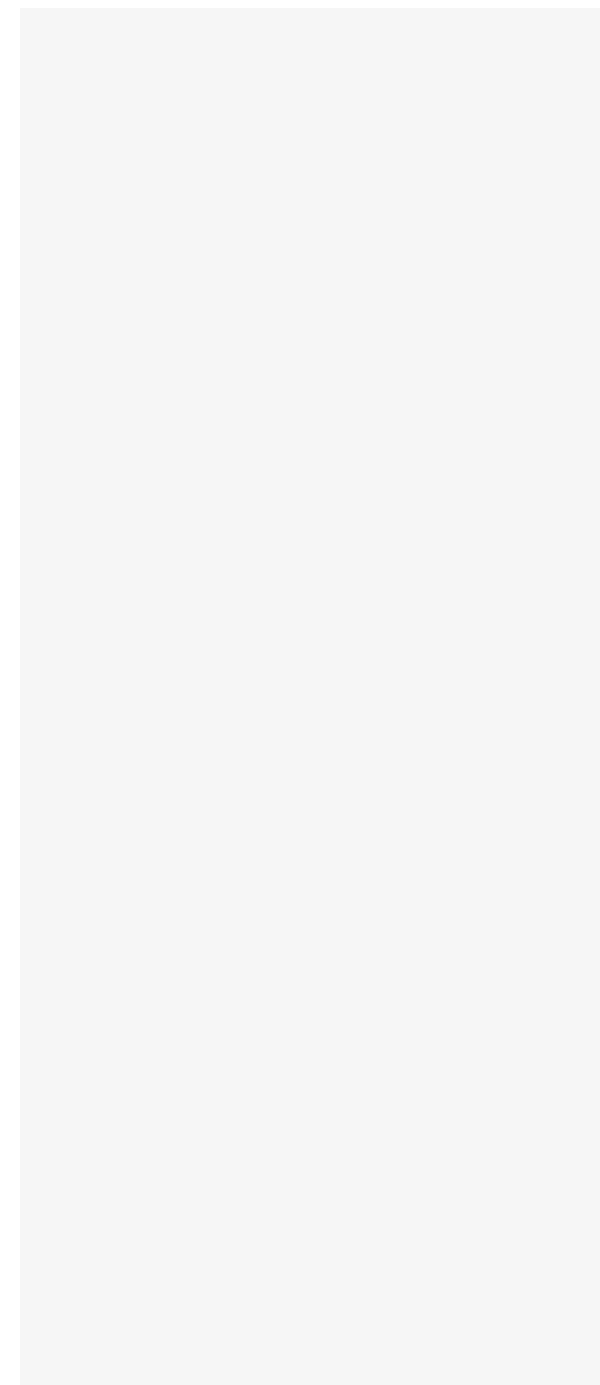

|           |                          |            |           |         |           |         |
|-----------|--------------------------|------------|-----------|---------|-----------|---------|
| 5         | Mbov_0154 <sup>a,b</sup> | AFM51527_1 | KYNTSSSAP | 368-376 |           |         |
|           |                          |            | NEYNVHYSL | 294-302 |           |         |
|           |                          |            | KEFTAKLQV | 327-335 |           |         |
|           |                          |            | EDLTKDHF  | 123-131 | MEKFKKKVI | 1-9     |
|           |                          |            | YHNTTNGYI | 380-388 | VHYSLFTYV | 298-306 |
|           |                          |            | KSIDNANAL | 268-276 | GEAIIAVKI | 456-464 |
|           |                          |            | DYNHTVKS  | 262-270 | TEALNQIEI | 341-349 |
|           |                          |            | RYASEFAYI | 66-74   | SEFAYISFF | 69-77   |
|           |                          |            | EYTVSYH   | 411-419 | LENGYTESI | 468-476 |
|           |                          |            | VHYSLFTYV | 298-306 | ISKEFTAKL | 325-333 |
|           |                          |            | IGTLKLTGL | 477-485 |           |         |
|           |                          |            | KANSNETEA | 34-42   |           |         |
|           |                          |            | FTYVPNAQF | 303-311 |           |         |
|           |                          |            | YEQLKNKV  | 449-457 |           |         |
|           |                          |            | YDALNSILI | 331-339 |           |         |
|           |                          |            | FDLDHYNLV | 218-226 |           |         |
|           |                          |            | SYINQIVPV | 362-370 |           |         |
|           |                          |            | EEIWKNFAL | 53-61   |           |         |
|           |                          |            | KYAFENKYI | 227-235 |           |         |
|           |                          |            | IEAFAHLGV | 429-437 |           |         |
| KELQGYAGI | 294-302                  |            |           |         |           |         |
| 6         | Mbov_0217 <sup>a,b</sup> | AFM51586_1 | LEEIWKNF  | 52-60   | SELKKLQTI | 179-187 |
|           |                          |            | SILISFNDL | 336-344 | KAIEAFAHL | 427-435 |
|           |                          |            | KEINNMLLV | 164-172 | GETDQKDFI | 144-152 |
|           |                          |            | NDVFTRKEI | 249-257 | FENKYIQLW | 230-238 |
|           |                          |            | NETDNKRRV | 314-322 |           |         |
|           |                          |            | ISKLLASL  | 4-12    |           |         |
|           |                          |            | SIVSYINQI | 359-367 |           |         |
|           |                          |            | EYYFVEKSL | 113-121 |           |         |
|           |                          |            | LYEQLKNKV | 448-456 |           |         |
|           |                          |            | KLQTIANNI | 183-191 |           |         |
|           |                          |            | VYDALNSIL | 330-338 |           |         |
|           |                          |            | FEGTIYKEY | 400-408 |           |         |

|            |                        |            |           |                        |            |           |
|------------|------------------------|------------|-----------|------------------------|------------|-----------|
| 7          | Mbov_0274 <sup>a</sup> | AFM51642_1 | SDYGITKSI | 123-131                | NEAALPNLI  | 95-103    |
|            |                        |            | IPLAVAAPM | 11-19                  | EEFRILNFL  | 512-520   |
|            |                        |            | SEIKEDDLI | 571-579                | FAQSNSWPL  | 35-43     |
|            |                        |            | REFELIKKV | 79-87                  | ASVVNDESL  | 482-490   |
|            |                        |            | AVVYNLEVL | 164-172                | DETLTGEVI  | 261-269   |
|            |                        |            | ISVDYANDL | 269-277                | TEGGSSLLV  | 425-433   |
|            |                        |            | KPVNVKYNI | 303-311                | KEDDLIKSI  | 574-582   |
|            |                        |            | GYIMPLASV | 476-484                | NEVFKGLTV  | 222-230   |
|            |                        |            | FETEADKLN | 493-501                | SAIGFAASV  | 367-375   |
|            |                        |            | NSTMYSRL  | 378-386                | LNFLRSAYV  | 517-525   |
|            |                        |            | VEENWKTFA | 464-472                |            |           |
|            |                        |            | TYLLRETNI | 206-214                |            |           |
|            |                        |            | KYKEQETQL | 249-257                |            |           |
|            |                        |            | STFSFDGIV | 408-416                |            |           |
|            |                        |            | KTLEKFAGF | 360-368                | EEHYGELI   | 171-179   |
|            |                        |            | 8         | Mbov_0290 <sup>b</sup> | AFM51658_1 | AELEQLKKL |
| LDSLFLVLSI | 115-123                | QELWNTYLL  |           |                        |            | 201-209   |
| KSFIWQNSI  | 383-391                | TEWENIVQV  |           |                        |            | 451-459   |
| FSFVLLPIL  | 4-12                   | GELIIGNDI  |           |                        |            | 289-297   |
| STDLFDAEL  | 224-232                | SENDELKKI  |           |                        |            | 41-49     |
| LEKIIVKDM  | 425-433                |            |           |                        |            |           |
| GEEHYGEL   | 170-178                |            |           |                        |            |           |
| FSFVLLPIL  | 4-12                   |            |           |                        |            |           |



|    |                          |            |           |         |           |         |
|----|--------------------------|------------|-----------|---------|-----------|---------|
|    |                          |            | KFHTATHNI | 133-141 |           |         |
|    |                          |            | FYYMDFKSI | 245-253 |           |         |
|    |                          |            | NENNFQSLW | 576-584 |           |         |
|    |                          |            | ISKNPFGYL | 229-237 |           |         |
|    |                          |            | IGLVISSNL | 8-16    |           |         |
|    |                          |            | AYYTPRYNV | 449-457 |           |         |
|    |                          |            | LNFNFNELI | 221-229 |           |         |
|    |                          |            | YLPSNLSQL | 236-244 |           |         |
|    |                          |            | SQLFYYMDF | 242-250 |           |         |
|    |                          |            | SILIWFNRW | 315-323 |           |         |
|    |                          |            | AYTISRSTS | 124-132 | YELLLATNI | 361-369 |
|    |                          |            | YDRSFSILI | 310-318 | QEELTSNII | 421-429 |
| 10 | Mbov_0350 <sup>a,b</sup> | AFM51716_1 | TDNRFWEHI | 164-172 | NELISKNPF | 226-234 |
|    |                          |            | QEDEITKDF | 331-339 | KHNTTSNAI | 666-674 |
|    |                          |            | YIYDRSFSI | 308-316 | VQPINPTNI | 80-88   |
|    |                          |            | KNRGWYGDL | 173-181 |           |         |
|    |                          |            | IYDRSFSIL | 309-317 |           |         |
|    |                          |            | VNENNFQSL | 575-583 |           |         |
|    |                          |            | IEKEDDALV | 631-639 |           |         |
|    |                          |            | LTYKFQANK | 554-562 |           |         |
|    |                          |            | FEKNSKHKF | 384-392 |           |         |
|    |                          |            | YKFQANKSI | 556-564 |           |         |
|    |                          |            | KNGEFEILL | 272-280 |           |         |
|    |                          |            | YQYIYDRSF | 306-314 |           |         |
|    |                          |            | GYLPSNLSQ | 235-243 |           |         |
|    |                          |            | IESWDTSNI | 357-365 |           |         |
|    |                          |            | SSLINKASF | 93-101  |           |         |
| 11 | Mbov_0364 <sup>a,b</sup> | AFM51726_1 | VEKMQSMFY | 415-423 | DESLKKTFI | 221-229 |
|    |                          |            | SNFCTNSGL | 444-452 | TEKEIINLV | 112-120 |
|    |                          |            | SMFYGASEF | 420-428 |           |         |
|    |                          |            | VTFFNAKKF | 395-403 |           |         |

12 Mbov\_0374<sup>b</sup> AFM51736\_1

|            |         |           |         |
|------------|---------|-----------|---------|
| SDTEAKTPI  | 40-48   |           |         |
| YELDHNDRI  | 393-401 |           |         |
| LSYATYESI  | 187-195 |           |         |
| EEEVKGLEV  | 154-162 |           |         |
| FNLRNISNI  | 199-207 |           |         |
| LEKKFKLLL  | 6-14    |           |         |
| IHSKTKTYI  | 69-77   |           |         |
| TTLDQFSTL  | 592-600 |           |         |
| SFVLSCTNV  | 24-32   |           |         |
| YLPSNLSQL  | 178-186 | WEKYQQPFI | 563-571 |
| SYFNTKNSG  | 443-451 | FEDAYAQYL | 404-412 |
| DENWFRD VW | 537-545 | RPQTNGIVL | 663-671 |
| VWLR YDEKL | 544-552 | ANIDFFTYI | 245-253 |
| SSFNVIGIL  | 623-631 | RYESNNTYL | 420-428 |
| YHYDKFKNV  | 323-331 | YELLLATNM | 302-310 |
| SDTEAKTPI  | 40-48   | IDGLKSKLI | 689-697 |
| KNFLKTRNI  | 84-92   |           |         |
| KFLGTAWVI  | 282-290 |           |         |
| ATNMHVFNL  | 307-315 |           |         |
| GHYLNHQHL  | 141-149 |           |         |
| EYWSYAKYL  | 109-117 |           |         |
| GIFNFPKFL  | 276-284 |           |         |
| FNFPKFLGT  | 278-286 |           |         |
| GYLPSNLSQ  | 177-185 |           |         |
| SETLKNNFS  | 435-443 |           |         |

|    |                          |            |           |         |           |         |
|----|--------------------------|------------|-----------|---------|-----------|---------|
|    |                          |            | IYNGVSSNV | 493-501 |           |         |
|    |                          |            | LAYNEYGQM | 482-490 |           |         |
|    |                          |            | FALKFLTKL | 94-102  |           |         |
|    |                          |            | NDNKDNKLI | 57-65   |           |         |
|    |                          |            | LYYGASGSL | 474-482 |           |         |
|    |                          |            | FDSYWGRVL | 451-459 |           |         |
|    |                          |            | SSISLVLL  | 14-22   |           |         |
|    |                          |            | FIATNLHVL | 134-142 |           |         |
|    |                          |            | QYNVNFSSL | 466-474 |           |         |
|    |                          |            | SSNVQFGDL | 498-506 | TEAISSPKI | 228-236 |
|    |                          |            | SNVQFGDLL | 499-507 | SENNVGEKI | 435-443 |
| 13 | Mbov_0468 <sup>a,b</sup> | AFM51824_1 | KYQDKLNEV | 251-259 | NEYGQMIGI | 485-493 |
|    |                          |            | RVLAAWYGF | 457-465 | KYLQTVDYV | 344-352 |
|    |                          |            | VPMMVDFGI | 289-297 | AWYGFQYNV | 461-469 |
|    |                          |            | SSISLVLL  | 14-22   |           |         |
|    |                          |            | FALKFLTKL | 94-102  |           |         |
|    |                          |            | YGFQYNVNF | 463-471 |           |         |
|    |                          |            | IFDSYWGRV | 450-458 |           |         |
|    |                          |            | AYNEYQMI  | 483-491 |           |         |
|    |                          |            | TEGFSENNV | 431-439 |           |         |
|    |                          |            | QNQSMKDFD | 400-408 |           |         |
|    |                          |            | LLIPMLSSI | 8-16    |           |         |
|    |                          |            | NQTSLFKII | 72-80   |           |         |

|    |                          |            |            |         |           |         |
|----|--------------------------|------------|------------|---------|-----------|---------|
|    |                          |            | VDYKLLKKII | 116-124 |           |         |
|    |                          |            | FQLKYYPFL  | 240-248 |           |         |
|    |                          |            | EFLRSISTI  | 75-83   |           |         |
|    |                          |            | PYAFSAGNI  | 446-454 |           |         |
|    |                          |            | IGYKTFGGA  | 468-476 |           |         |
|    |                          |            | NIFRFAESL  | 206-214 |           |         |
|    |                          |            | ASAIYAIL   | 476-484 |           |         |
|    |                          |            | FLFDYYYGI  | 247-255 |           |         |
|    |                          |            | IELIQSKYP  | 426-434 |           |         |
|    |                          |            | DESALKEFL  | 33-41   |           |         |
|    |                          |            | KDNNVGKVI  | 460-468 | FEEDSASHI | 362-370 |
| 14 | Mbov_0471 <sup>a,b</sup> | AFM51827_1 | KNIVFNLT   | 383-391 | SNYKFFTEI | 126-134 |
|    |                          |            | FEFDLKKYN  | 161-169 | HYLSTKKII | 282-290 |
|    |                          |            | AYVGIKEFL  | 69-77   | EEKLKISFL | 142-150 |
|    |                          |            | SLNSNSSTI  | 586-594 |           |         |
|    |                          |            | KYERGEK    | 137-145 |           |         |
|    |                          |            | YMHNDVAYV  | 63-71   |           |         |
|    |                          |            | SLNSNSSTI  | 586-594 |           |         |
|    |                          |            | NESNIQTYF  | 192-200 |           |         |
|    |                          |            | EYQNVYTPD  | 343-351 |           |         |
|    |                          |            | ISSAFILPF  | 11-19   |           |         |
|    |                          |            | YPFLFDYYY  | 245-253 |           |         |
|    |                          |            | FDYYYGIKL  | 249-257 |           |         |
|    |                          |            | IAIILSTVV  | 617-625 |           |         |

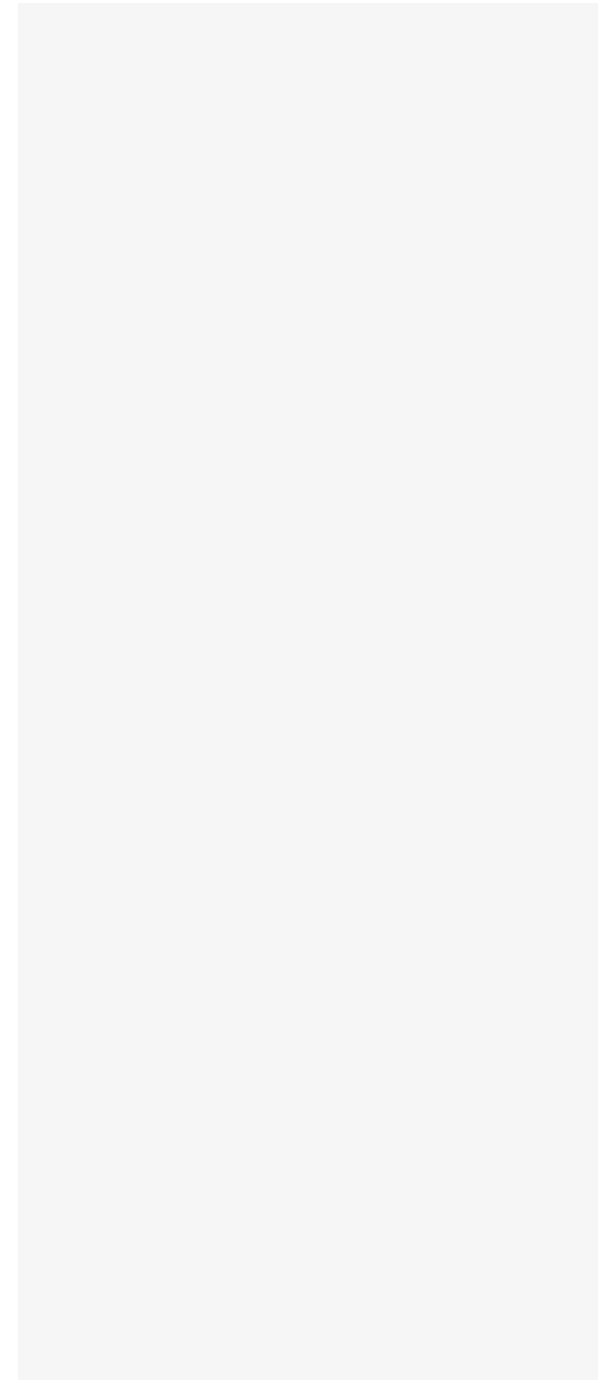



|    |                          |            |           |         |           |         |
|----|--------------------------|------------|-----------|---------|-----------|---------|
|    |                          |            | NDLDFYQYI | 362-370 |           |         |
|    |                          |            | LYNTYSNAI | 748-756 |           |         |
|    |                          |            | DHLSTSQTI | 394-402 |           |         |
|    |                          |            | SAIKHTIGL | 277-285 |           |         |
|    |                          |            | YEQYLTPY  | 514-522 |           |         |
|    |                          |            | NSNINAENI | 45-53   |           |         |
|    |                          |            | IAKSFKISL | 97-105  |           |         |
|    |                          |            | WEYTKEIGI | 229-237 |           |         |
|    |                          |            | YSNNFDGNL | 765-773 |           |         |
|    |                          |            | IENDAVISF | 77-85   |           |         |
|    |                          |            | SCFENAYNI | 26-34   |           |         |
|    |                          |            | YIYDHSFSI | 369-377 |           |         |
|    |                          |            | TFYGGYPSV | 610-618 |           |         |
|    |                          |            | KHHPIKTTF | 603-611 |           |         |
|    |                          |            | FLPSNLSQL | 296-304 |           |         |
|    |                          |            | FDGEHGMPL | 690-698 |           |         |
| 15 | Mbov_0505 <sup>a,b</sup> | AFM51861_1 | EYKHAVNNI | 190-198 | FEYDKSKYI | 60-68   |
|    |                          |            | KYWEYTKEI | 227-235 | NQHSNMYTL | 702-710 |
|    |                          |            | KTFDKSLYF | 437-445 | NEAEKNSAI | 271-279 |
|    |                          |            | KLYNTYSNA | 747-755 | YELLLATNM | 422-430 |
|    |                          |            | DYKSASKVL | 309-317 |           |         |
|    |                          |            | NDAVISFNI | 79-87   |           |         |
|    |                          |            | YIQKFLPNF | 262-270 |           |         |
|    |                          |            | AENIKIDDI | 50-58   |           |         |
|    |                          |            | FYNNTLSAN | 251-259 |           |         |
|    |                          |            | ATNMHVFNL | 427-435 |           |         |
|    |                          |            | IAKNPFGL  | 289-297 |           |         |
|    |                          |            | NTYSNAISL | 750-758 |           |         |
|    |                          |            | FKNNNHPPI | 89-97   |           |         |
|    |                          |            | NFYDSITNI | 465-473 |           |         |
|    |                          |            | FDGNLRNDI | 769-777 |           |         |
|    |                          |            | TTINQHSNM | 699-707 |           |         |
|    |                          |            | AVISFNIAF | 81-89   |           |         |

16 Mbov\_0515<sup>a,b</sup> AFM51869\_1

|           |         |           |         |
|-----------|---------|-----------|---------|
| FEREVAKAP | 262-270 |           |         |
| SGLILRDPI | 159-167 |           |         |
| SNSQFKTNL | 826-834 |           |         |
| EEYIDFAVV | 532-540 |           |         |
| VEEYIDFAV | 531-539 |           |         |
| FEDKNEEQI | 327-335 |           |         |
| SYLESQIKI | 337-345 |           |         |
| GELDVSLLF | 124-132 |           |         |
| SYREALKTM | 814-822 | KYTNVISAI | 97-105  |
| KAPSHVDTL | 268-276 | YEKDIKNHI | 580-588 |
| VTFNFEKDF | 305-313 | TEKKLPTII | 111-119 |
| VSFKFSNGG | 62-70   | AENNKDKLI | 565-573 |
| DYENVEEYI | 527-535 | SYLDNYNSI | 594-602 |
| TVNSKYTNV | 93-101  | FEKDFRKEL | 309-317 |
| NYNSIDVPL | 598-606 | NEEQIKSYL | 331-339 |
| FFFGTNSHV | 446-454 | EENTQNLSV | 84-92   |
| KDYYLERYI | 635-643 |           |         |
| SYIHSSQKA | 518-526 |           |         |
| SYQIGYRTF | 691-699 |           |         |
| KYVNYGLHL | 732-740 |           |         |
| FSFSKPSGI | 493-501 |           |         |
| LAPRFYAPN | 740-748 |           |         |
| DGFKKYLG  | 174-182 |           |         |
| YAENNKDKL | 564-572 |           |         |

|    |                          |            |            |         |           |         |
|----|--------------------------|------------|------------|---------|-----------|---------|
|    |                          |            | LEKEGFKSL  | 269-277 |           |         |
|    |                          |            | QYNKVTSRL  | 333-341 |           |         |
|    |                          |            | IEKPIEKKI  | 81-89   |           |         |
|    |                          |            | SGYGKLNKLN | 423-431 |           |         |
|    |                          |            | KYYQYSDAL  | 704-712 |           |         |
|    |                          |            | GYGKLNLI   | 424-432 |           |         |
|    |                          |            | AQATNTSSL  | 479-487 |           |         |
|    |                          |            | DYSRTIDSI  | 59-67   |           |         |
|    |                          |            | KYYQYSDAL  | 704-712 |           |         |
|    |                          |            | EEGKGIGLF  | 198-206 |           |         |
|    |                          |            | SLYTMGNSL  | 499-507 |           |         |
| 17 | Mbov_0516 <sup>a,b</sup> | AFM51870_1 | VTVSKLLNI  | 172-180 | WYLRSSDSI | 356-364 |
|    |                          |            | VEEDNGLTF  | 739-747 | FELTRQNPV | 395-403 |
|    |                          |            | GYSTNSMKI  | 677-685 |           |         |
|    |                          |            | ANISGYQNV  | 164-172 |           |         |
|    |                          |            | SQYPPNTPI  | 533-541 |           |         |
|    |                          |            | KYIWIIANL  | 280-288 |           |         |
|    |                          |            | DYLKKGLAI  | 302-310 |           |         |
|    |                          |            | LYTMGNSLL  | 500-508 |           |         |
|    |                          |            | TPIATRISF  | 539-547 |           |         |
|    |                          |            | SEKVKIFGV  | 132-140 |           |         |
|    |                          |            | LDKAEAVLI  | 223-231 |           |         |
|    |                          |            | SLYTMGNSL  | 499-507 |           |         |
|    |                          |            | ITSYRIFNM  | 442-450 |           |         |
|    |                          |            | EKITPPKV   | 90-98   |           |         |

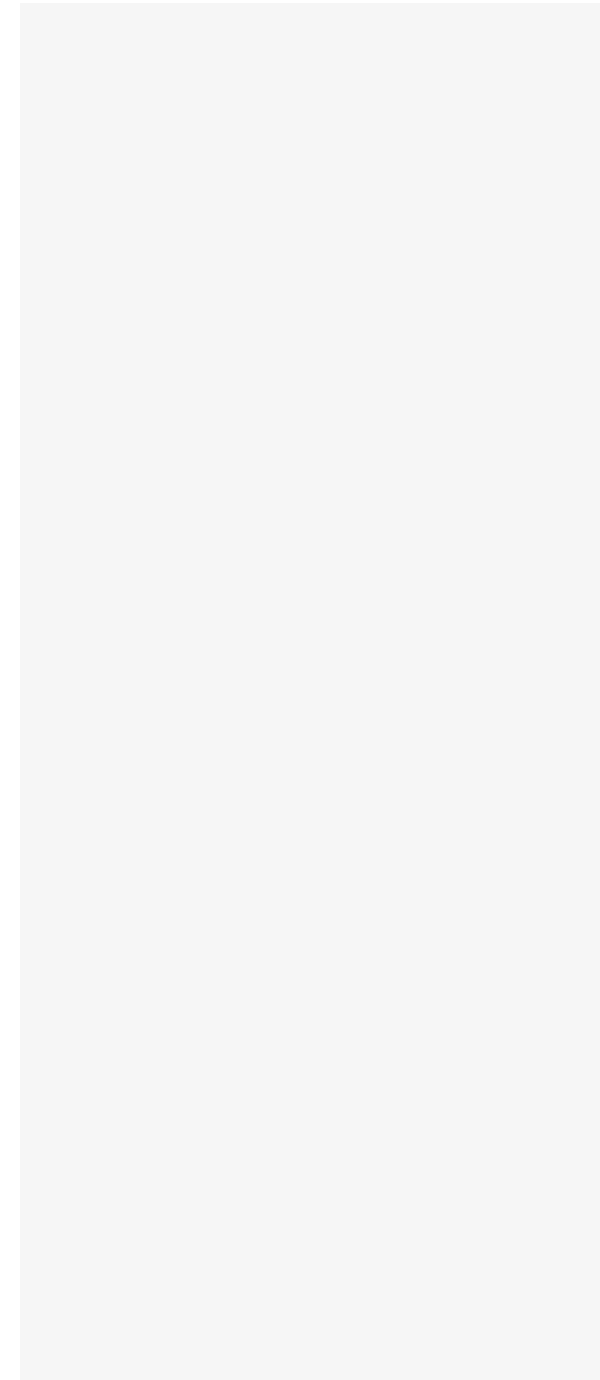

18 Mbov\_0517<sup>a,b</sup> AFM51871\_1

|           |         |           |         |
|-----------|---------|-----------|---------|
| FNLKFFSL  | 693-701 |           |         |
| SYETYDSQL | 45-53   |           |         |
| SEGNSYPL  | 589-597 |           |         |
| SDFNFAQSL | 35-43   |           |         |
| VPIATRITF | 532-540 |           |         |
| VSSEYARNV | 524-532 |           |         |
| GYKKTKELI | 417-425 |           |         |
| NERIFQGSF | 572-580 |           |         |
| GEETKSINI | 673-681 |           |         |
| LENKKIKEL | 483-491 | VETGTGSFI | 731-739 |
| KELLSKNV  | 240-248 | TEELRKKTV | 178-186 |
| TDYDRTKGI | 150-158 | SEYARNVPI | 526-534 |
| KYIWLIANL | 271-279 | WAFKNVAWI | 509-517 |
| YETYDSQLA | 46-54   | FDGTFFKVI | 199-207 |
| SEYQTKQFG | 258-266 | YYARNNERI | 567-575 |
| VIVNKLISV | 167-175 | TEKLNSDGI | 684-692 |
| KFFSLNDAL | 697-705 |           |         |
| NNLFRYKEL | 234-242 |           |         |
| SDFNFAQSL | 35-43   |           |         |
| SEGNSYPL  | 589-597 |           |         |
| FNPWAFKNV | 506-514 |           |         |
| KYIWLIANL | 271-279 |           |         |
| LYTLGNSLL | 493-501 |           |         |
| TEFSSYKIG | 371-379 |           |         |
| FLLSGGVL  | 14-22   |           |         |

19 Mbov\_0518<sup>b</sup> AFM51872\_1

YGYDYKGLL 780-788  
SYLKDYDQI 595-603  
KYYKNVTTQ 665-673  
SSFDSYINA 234-242  
TESGTMWLM 420-428  
LESKPADFL 508-516  
VEEFMDFAV 527-535  
IEIDFEKVL 536-544  
LMPRSYVPM 735-743  
YPLSVGDYF 631-639  
DNPMYAMML 189-197  
SYVPMGGAS 739-747  
KYFNYGLHL 727-735  
LEYHKLSHL 174-182  
LMPRSYVPM 735-743  
VSFTVLNTF 306-314  
SDNKSIKLL 31-39  
QEQINSFTF 333-341  
GVISNNQFL 551-559  
TMWLMDFML 424-432  
NDKDFEQLI 40-48  
KYKNTEELI 566-574  
SGLLEYHKL 171-179  
KYFNYGLHL 727-735  
SLYILGYPL 625-633  
SNFGPSKPL 63-71  
LDDRFTKFL 481-489  
KYQSNKTY 817-825  
KVLQNKESL 542-550  
NTEELIKLI 569-577  
GDYFLENYI 636-644

YEIGYRSFI 693-701  
EEFMDFAVI 528-536  
KYANSISVI 93-101  
STIPFLSTL 11-19  
FYFGTNSHV 442-450  
MYMAMLKNI 192-200  
TYQVSFTVL 303-311  
TSFIFDSNF 57-65

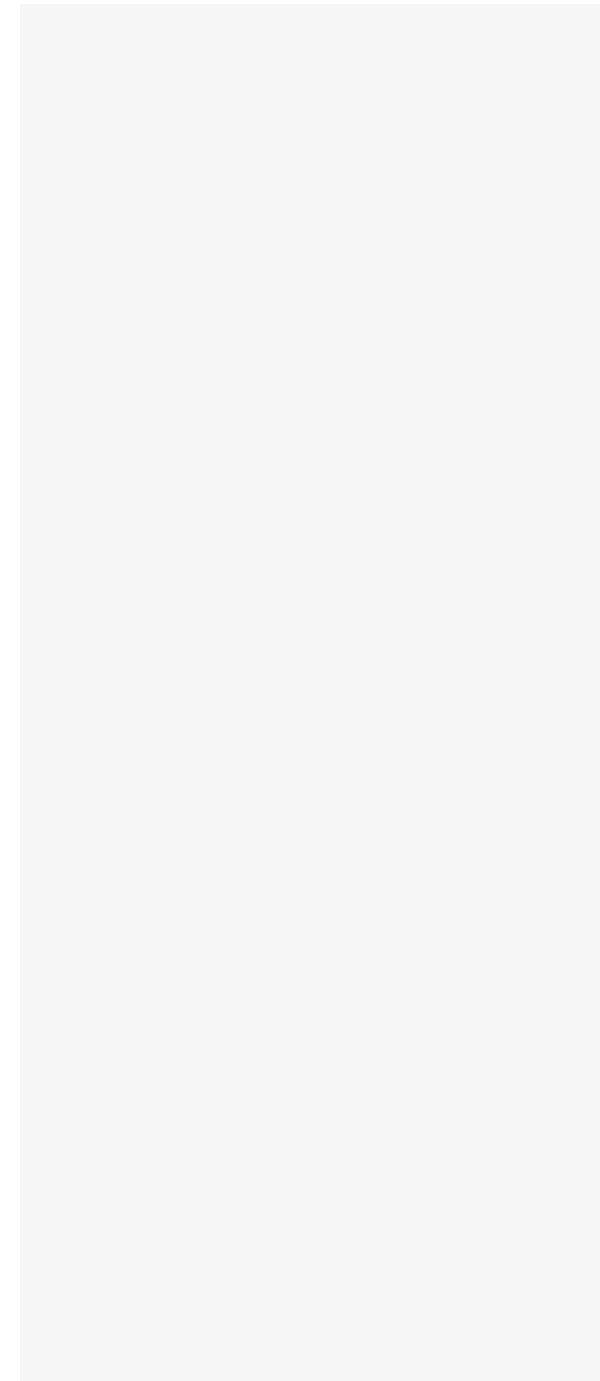

|    |                          |            |           |         |           |         |
|----|--------------------------|------------|-----------|---------|-----------|---------|
|    |                          |            | TFFVFLNNI | 199-207 |           |         |
|    |                          |            | KNRVIFATL | 8-16    |           |         |
|    |                          |            | FDSIVQRQI | 261-269 |           |         |
|    |                          |            | NELDQKAVW | 680-688 |           |         |
|    |                          |            | LENKRIKEL | 479-487 |           |         |
|    |                          |            | SNVNPYQNI | 156-164 |           |         |
|    |                          |            | SDIDLSRVI | 35-43   |           |         |
|    |                          |            | IMFSNGDTT | 663-671 |           |         |
|    |                          |            | DAVMNNPWI | 219-227 | LALRNTEWI | 505-513 |
| 20 | Mbov_0519 <sup>a,b</sup> | AFM51873_1 | FAGTFFVFL | 196-204 | VENEKPVVI | 72-80   |
|    |                          |            | IEVTPDRVI | 138-146 | LERLGKVV  | 719-727 |
|    |                          |            | LDQKAVWNL | 682-690 | FEHFATDSM | 647-655 |
|    |                          |            | QFNTVTSRI | 320-328 |           |         |
|    |                          |            | SGYDKTLKL | 412-420 |           |         |
|    |                          |            | IIVSKVLNV | 164-172 |           |         |
|    |                          |            | NEGNNSYPM | 584-592 |           |         |
|    |                          |            | VSRDFRPNT | 520-528 |           |         |
|    |                          |            | LYTLGNSLL | 489-497 |           |         |
|    |                          |            | FAGTFFVFL | 196-204 |           |         |
|    |                          |            | RESNLTKAI | 275-283 |           |         |
|    |                          |            | KEIDFSKIL | 323-331 |           |         |
|    |                          |            | LYEKVHNEL | 157-165 |           |         |
|    |                          |            | QENKSNALF | 75-83   |           |         |
|    |                          |            | FSLTYYPFI | 88-96   |           |         |
|    |                          |            | DSNANAETI | 310-318 |           |         |
| 21 | Mbov_0536 <sup>a,b</sup> | AFM51890_1 | ANYQYNELF | 348-356 |           |         |
|    |                          |            | FDSNKAIKI | 226-234 |           |         |
|    |                          |            | NELSVYRFT | 366-374 |           |         |
|    |                          |            | ISIPKKEPL | 39-47   |           |         |
|    |                          |            | SNIESWYLI | 217-225 |           |         |
|    |                          |            | KLLTTSTVV | 3-11    |           |         |
|    |                          |            | LFVEAINTI | 355-363 |           |         |

|    |                          |            |           |         |           |         |
|----|--------------------------|------------|-----------|---------|-----------|---------|
|    |                          |            | KEKLMNKSL | 698-706 |           |         |
|    |                          |            | TEGITTKNL | 436-444 |           |         |
|    |                          |            | VVVPRFVHI | 475-483 |           |         |
|    |                          |            | LGVGGRYSL | 411-419 |           |         |
|    |                          |            | VYLNISMML | 711-719 |           |         |
|    |                          |            | IAPDFQPVL | 488-496 |           |         |
|    |                          |            | NEKPFADAL | 188-196 |           |         |
|    |                          |            | QAIGFSALI | 13-21   |           |         |
|    |                          |            | IGFSALIPV | 15-23   |           |         |
|    |                          |            | QNNYMSKYI | 96-104  |           |         |
|    |                          |            | VYLNISMML | 711-719 |           |         |
| 22 | Mbov_0570 <sup>a,b</sup> | AFM51924_1 | TSQDFEVKL | 207-215 | TEVKKGQII | 594-602 |
|    |                          |            | INNQLAEL  | 332-340 | FDTEAFKAI | 106-114 |
|    |                          |            | FEKYNQVNL | 53-61   | AELIDVHTI | 338-346 |
|    |                          |            | FGIEDLFEL | 744-752 | HIYMSFLHL | 548-556 |
|    |                          |            | KYINFDTEA | 102-110 |           |         |
|    |                          |            | KPETVEYSL | 85-93   |           |         |
|    |                          |            | YTLKFNKFI | 272-280 |           |         |
|    |                          |            | AAYELTTKV | 505-513 |           |         |
|    |                          |            | HAHVNLVTN | 617-625 |           |         |
|    |                          |            | VIKIPVANL | 523-531 |           |         |
|    |                          |            | LPSIDKTFF | 444-452 |           |         |
|    |                          |            | YSLLFDKQF | 416-424 |           |         |

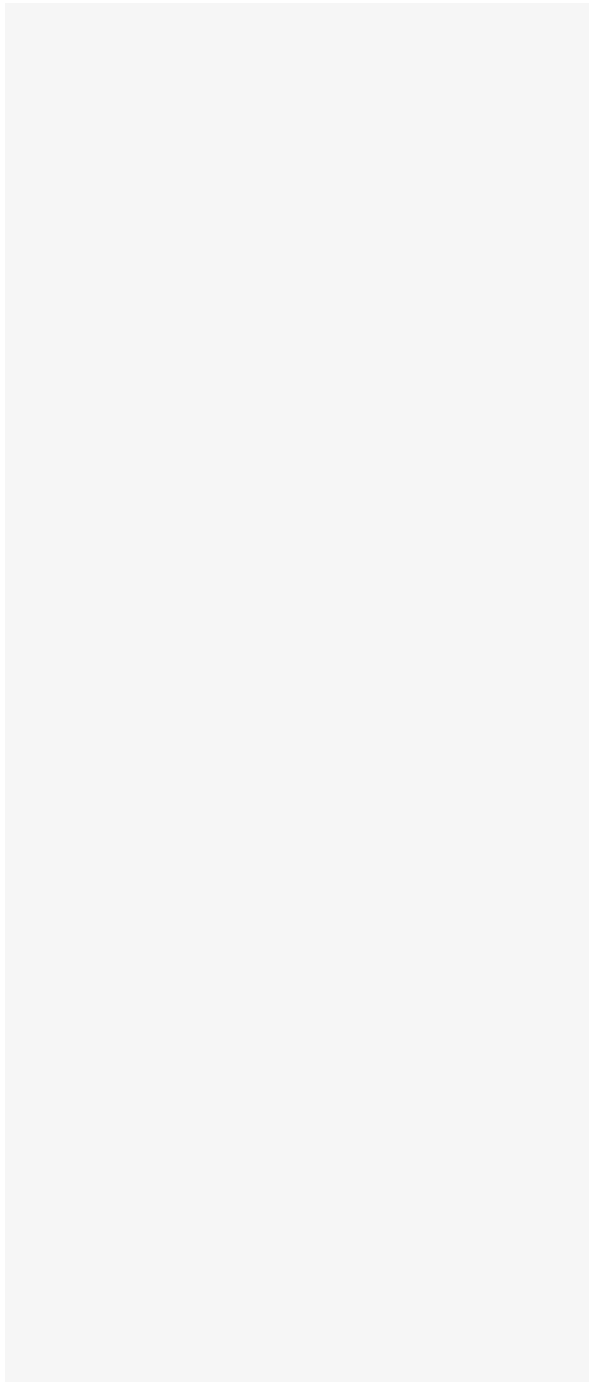

23

Mbov\_0579<sup>a,b</sup>

AFM51933\_1

|            |         |
|------------|---------|
| ISSSTFENL  | 246-254 |
| NYGSLASRL  | 111-119 |
| RANSNTENL  | 156-164 |
| FEKTDTSKI  | 644-652 |
| FDKEIIGSI  | 711-719 |
| STFENLEEL  | 249-257 |
| TYNELKEAV  | 660-668 |
| YAMINADAN  | 295-303 |
| FENKGAKFD  | 195-203 |
| VIYSQGPSL  | 566-574 |
| SIASSSQI   | 718-726 |
| SYQTKHEYA  | 361-369 |
| IYSQGPSLI  | 567-575 |
| FMIPMLKSI  | 170-178 |
| KFLTSLEKI  | 592-600 |
| IYNKFESL   | 337-345 |
| KEAVTNKNV  | 665-673 |
| SYKSLDSAT  | 453-461 |
| NADANDFFI  | 299-307 |
| NLPNNGTFM  | 163-171 |
| TEKGVDQLF  | 414-422 |
| VIYEYPAGF  | 674-682 |
| LEDFDKEII  | 708-716 |
| FESSQQDAV  | 233-241 |
| AYLKAKNDQ  | 698-706 |
| YIVHTYNEL  | 656-664 |
| STFENLEEL  | 249-257 |
| TAIPLLA AV | 14-22   |
| LPNNGTFMI  | 164-172 |

|            |         |
|------------|---------|
| EELLN FANI | 255-263 |
| KESL ATKSL | 342-350 |
| DESEV QKLW | 222-230 |

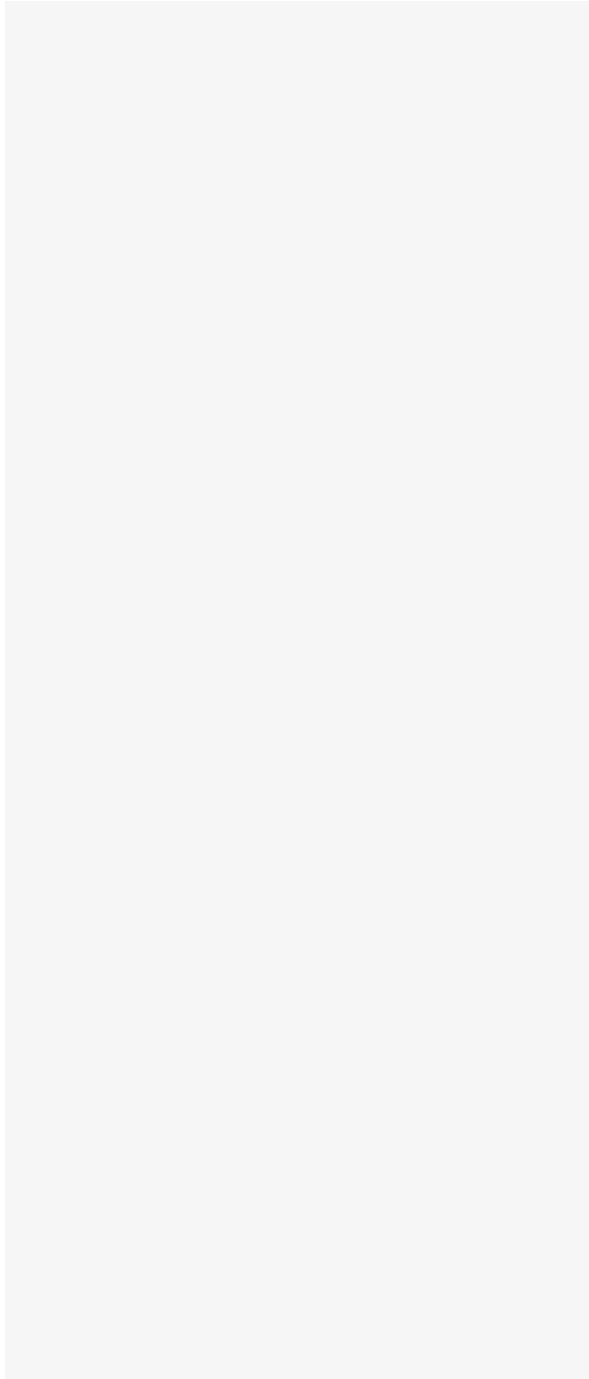



|           |                          |            |            |            |           |         |            |         |
|-----------|--------------------------|------------|------------|------------|-----------|---------|------------|---------|
| 24        | Mbov_0580 <sup>a,b</sup> | AFM51934_1 | LTLPYDNI   | 296-304    | VYWEHYALL | 315-323 |            |         |
|           |                          |            | RSIKNTLIV  | 3-11       |           |         |            |         |
|           |                          |            | FESNKASAF  | 160-168    |           |         |            |         |
|           |                          |            | IPGEKDYFL  | 79-87      |           |         |            |         |
|           |                          |            | LSIKNDKFI  | 141-149    |           |         |            |         |
|           |                          |            | LPYWIQSNI  | 345-353    |           |         |            |         |
|           |                          |            | KPNGKWTLL  | 357-365    |           |         |            |         |
|           |                          |            | GEKDYFLKI  | 81-89      |           |         |            |         |
|           |                          |            | KGFFKTFAL  | 337-345    |           |         |            |         |
|           |                          |            | AEINLEFKI  | 113-121    |           |         |            |         |
|           |                          |            | YQYLYSVEI  | 283-291    |           |         |            |         |
|           |                          |            | TSASAFLPV  | 13-21      |           |         |            |         |
|           |                          |            | SNLEHNYAL  | 236-244    |           |         |            |         |
|           |                          |            | WDKCLKAKYF | 175-183    |           |         |            |         |
|           |                          |            | PYLSTFLAI  | 144-152    |           |         |            |         |
|           |                          |            | YEYGYLLAL  | 227-235    |           |         |            |         |
|           |                          |            | NYGTTSIQI  | 316-324    |           |         |            |         |
| NNYEYGYLL | 225-233                  |            |            |            |           |         |            |         |
| GYLLALPPI | 230-238                  |            |            |            |           |         |            |         |
| INFLRNYDL | 238-246                  |            |            |            |           |         |            |         |
| SSYKIYDII | 375-383                  | DMISNYEEI  | 419-427    |            |           |         |            |         |
| ITFRNLTSL | 114-122                  |            |            |            |           |         |            |         |
| DEIKDLDMI | 413-421                  |            |            |            |           |         |            |         |
| FNYYSDKFI | 183-191                  |            |            |            |           |         |            |         |
| EYDTRASNI | 78-86                    |            |            |            |           |         |            |         |
| SLTITFRNL | 111-119                  |            |            |            |           |         |            |         |
| KYLYFANDV | 101-109                  |            |            |            |           |         |            |         |
| YYDTMKNYG | 310-318                  |            |            |            |           |         |            |         |
| KKYDFKYFL | 354-362                  |            |            |            |           |         |            |         |
| SYAQTFNYY | 178-186                  |            |            |            |           |         |            |         |
| KNNYEYGYL | 224-232                  |            |            |            |           |         |            |         |
| 25        | Mbov_0585 <sup>a,b</sup> |            |            | AFM51939_1 | ITFRNLTSL | 114-122 | ITFRNLTSL  | 114-122 |
|           |                          |            |            |            | DEIKDLDMI | 413-421 | KEFLKTNPV  | 39-47   |
|           |                          |            |            |            | FNYYSDKFI | 183-191 | SSLSEFNLSL | 167-175 |

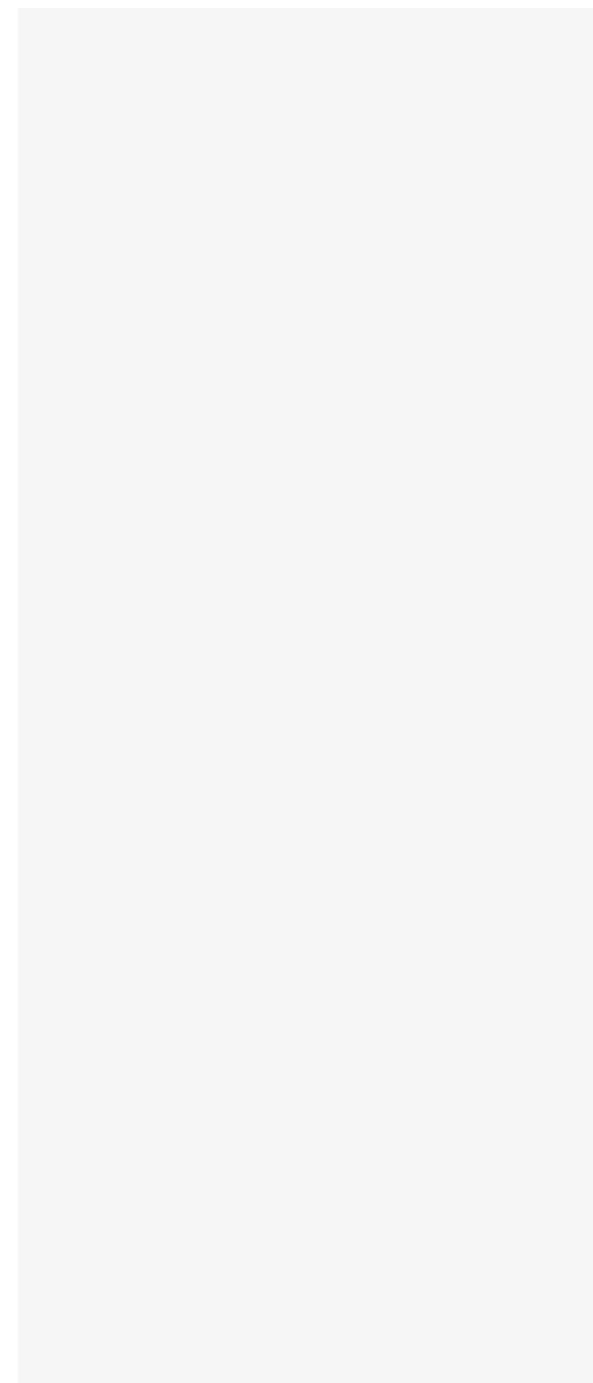

|    |                          |            |           |         |           |         |
|----|--------------------------|------------|-----------|---------|-----------|---------|
|    |                          |            | GYGAAYEI  | 394-402 |           |         |
|    |                          |            | EKLDIQFL  | 141-149 |           |         |
|    |                          |            | YYSKSSDLI | 304-312 |           |         |
|    |                          |            | GYYSKSSDL | 303-311 |           |         |
|    |                          |            | FLLDYYYGL | 246-254 |           |         |
|    |                          |            | YYILPTGDI | 480-488 |           |         |
|    |                          |            | AAYEIMGFL | 398-406 |           |         |
|    |                          |            | IETGAKNLY | 519-527 |           |         |
|    |                          |            | KNIIFNVTL | 382-390 |           |         |
|    |                          |            | KYKSQIHT  | 268-276 |           |         |
| 26 | Mbov_0658 <sup>a,b</sup> | AFM52009_1 | NYFVLTAPV | 438-446 | FEEDSATHI | 361-369 |
|    |                          |            | SAGNIFPQL | 449-457 | SNYKFFVEI | 125-133 |
|    |                          |            | NESNVQTYF | 191-199 | FNVWTYNPL | 411-419 |
|    |                          |            | YYYGLKSES | 250-258 | HYLSTRKIV | 281-289 |
|    |                          |            | LDDLHSAYI | 292-300 |           |         |
|    |                          |            | AYIGIQEFL | 68-76   |           |         |
|    |                          |            | QSKYFSFLL | 240-248 |           |         |
|    |                          |            | MTYFLVKRF | 634-642 |           |         |
|    |                          |            | RDNNLGKII | 459-467 |           |         |
|    |                          |            | NDLYLPQIL | 176-184 |           |         |
|    |                          |            | KPFNVWTYN | 409-417 |           |         |
|    |                          |            | FQSKYFSFL | 239-247 |           |         |
|    |                          |            | ITSCTIAPL | 11-19   |           |         |



|    |                          |            |           |         |           |         |
|----|--------------------------|------------|-----------|---------|-----------|---------|
| 27 | Mbov_0674 <sup>a,b</sup> | AFM52024_1 | KETPFGGSV | 212-220 |           |         |
|    |                          |            | KYMSNPSYT | 167-175 |           |         |
|    |                          |            | VNQIYYNKF | 3-11    |           |         |
|    |                          |            | KAYFKTQAL | 107-115 |           |         |
|    |                          |            | PPYAMKFKI | 226-234 |           |         |
|    |                          |            | WIYTYAGLV | 18-26   |           |         |
|    |                          |            | TSINKYANS | 339-347 | FEMKKFKWI | 11-19   |
|    |                          |            | SELNEAHNL | 272-280 | NEAHNLQYV | 275-283 |
|    |                          |            | QYVKSSSSK | 388-396 | YVFDYFNEL | 282-290 |
|    |                          |            | HSPVGYTVL | 412-420 | KWIYTYAGL | 17-25   |
|    |                          |            | IYTYAGLVI | 19-27   | KYKSNSGYI | 397-405 |
|    |                          |            | LFFAGDTNI | 297-305 | KYANSYDKI | 343-351 |
|    |                          |            | GDGEFAGFL | 178-186 | INIGFWNVL | 90-98   |
|    |                          |            | YDFVNNGFL | 368-376 |           |         |
|    |                          |            | FLYKNINSL | 375-383 |           |         |
|    |                          |            | SSLSFTTSC | 30-38   |           |         |
|    |                          |            | VIFNQKYDL | 118-126 |           |         |
|    |                          |            | FEGAGSSEL | 266-274 |           |         |
|    |                          |            | KIFKLYDFV | 363-371 |           |         |



|    |                          |            |            |         |           |         |
|----|--------------------------|------------|------------|---------|-----------|---------|
|    |                          |            | SYIKFGQLI  | 638-646 |           |         |
|    |                          |            | VEKDKDYI   | 593-601 |           |         |
|    |                          |            | VESDIKELV  | 51-59   |           |         |
|    |                          |            | LESGIKVGI  | 258-266 |           |         |
|    |                          |            | AWVKTRTPI  | 84-92   |           |         |
|    |                          |            | CYTKYLSEL  | 366-374 |           |         |
|    |                          |            | KGVNFIIAL  | 305-313 | NEQVFTPYI | 246-254 |
|    |                          |            | YIVTNDFIL  | 600-608 | KEAINAKDI | 62-70   |
| 28 | Mbov_0675 <sup>a,b</sup> | AFM52025_1 | ADAAAYDFI  | 471-479 | ESYIKFGQL | 637-645 |
|    |                          |            | VHVTFLDPI  | 284-292 | YYIVTNDFI | 599-607 |
|    |                          |            | SDSDKGLTI  | 173-181 | VEELKSKGV | 299-307 |
|    |                          |            | AYAQYSHNV  | 555-563 | KETKDDKFI | 570-578 |
|    |                          |            | IEFKHTEEV  | 435-443 |           |         |
|    |                          |            | NFIALTHL   | 308-316 |           |         |
|    |                          |            | SAFAAIPMV  | 13-21   |           |         |
|    |                          |            | RTIEYTELL  | 393-401 |           |         |
|    |                          |            | VVFNLPDEF  | 429-437 |           |         |
|    |                          |            | KFILGLGAI  | 4-12    |           |         |
|    |                          |            | GEYQLLKKV  | 95-103  |           |         |
|    |                          |            | LNMLRSAQL  | 544-552 |           |         |
|    |                          |            | NEYGEYQLL  | 92-100  |           |         |
|    |                          |            | EEEKVVFRL  | 28-36   |           |         |
|    |                          |            | FELDKDKNV  | 310-318 |           |         |
|    |                          |            | TETIYNIPF  | 165-173 | EEEDNWYTI | 484-492 |
|    |                          |            | KEWGSWQIF  | 372-380 | SAISFAASV | 384-392 |
| 29 | Mbov_0739 <sup>a,b</sup> | AFM52087_1 | TELDNRNKEF | 591-599 | GAYQNKITM | 393-401 |
|    |                          |            | WYTIARTSG  | 489-497 | QIFRFQSAI | 378-386 |
|    |                          |            | IFHEGGSSI  | 445-453 | IENENVEGI | 202-210 |
|    |                          |            | KSIADLHSI  | 150-158 |           |         |
|    |                          |            | GYIMPLASV  | 497-505 |           |         |
|    |                          |            | IRFEFADNF  | 68-76   |           |         |
|    |                          |            | LPAAAGLSV  | 13-21   |           |         |
|    |                          |            | SEHDVLMPL  | 425-433 |           |         |
|    |                          |            | SAISFAASV  | 384-392 |           |         |

|            |         |           |         |
|------------|---------|-----------|---------|
| YENEFSNYY  | 303-311 |           |         |
| TEAIQANSY  | 422-430 |           |         |
| ISYDHIKEL  | 606-614 |           |         |
| SLMLNTNEM  | 88-96   |           |         |
| SKFVKYTYI  | 578-586 |           |         |
| VSLTLTAAV  | 888-896 |           |         |
| VNISKVNLL  | 668-676 |           |         |
| VIPMLSMSL  | 23-31   |           |         |
| LNFNTRYKSI | 828-836 |           |         |
| IDLKVNKFL  | 491-499 |           |         |
| INYQNGDHI  | 691-699 |           |         |
| TNVLNFNYV  | 616-624 |           |         |
| TNVLNFNYV  | 616-624 |           |         |
| FKVSNNDLI  | 483-491 |           |         |
| NEFSNYYNV  | 305-313 |           |         |
| GYEYIGKNI  | 286-294 |           |         |
| SYVLNNTTP  | 446-454 |           |         |
| TYKSINQLL  | 832-840 |           |         |
| VNFLPYNSS  | 270-278 |           |         |
| VAIRGYKTV  | 195-203 |           |         |
| KHITKNGSL  | 185-193 |           |         |
| VPFAESGTF  | 557-565 |           |         |
| VNKKFMNWL  | 6-14    |           |         |
| VIVGSKAPL  | 378-386 |           |         |
| FSLRDDYIL  | 57-65   |           |         |
| KYYISYDHI  | 603-611 |           |         |
| IEVQNSKV   | 212-220 |           |         |
| SSFIDDSFI  | 512-520 |           |         |
| ANDKYYKNI  | 204-212 |           |         |
| TDGTTGAWI  | 248-256 |           |         |
| NQYQYNTGL  | 67-75   |           |         |
| YYNVANYGV  | 310-318 |           |         |
| NYYNVANYG  | 309-317 |           |         |
| LPYNSSAII  | 273-281 |           |         |
|            |         | YVLNNTTPV | 447-455 |
|            |         | NELRYSWEI | 791-799 |
|            |         | LEKPNSKFV | 573-581 |
|            |         | FETYDFDKI | 175-183 |
|            |         | KYHSSIKII | 772-780 |
|            |         | KYYISYDHI | 603-611 |
|            |         | NDQTYANPI | 631-639 |
|            |         | KYTFSKLYI | 535-543 |
|            |         | FDVNVSSFI | 507-515 |
|            |         | YEYIGKNIL | 287-295 |

|    |                          |            |           |         |
|----|--------------------------|------------|-----------|---------|
|    |                          |            | GEVTLKFEI | 109-117 |
|    |                          |            | GEVTLKFEI | 195-203 |
|    |                          |            | IEAAIKEAI | 69-77   |
| 31 | Mbov_0798 <sup>a,b</sup> | AFM52146_1 | IEAAIKEAI | 155-163 |
|    |                          |            | FEGEVTLKF | 107-115 |
|    |                          |            | FEGEVTLKF | 193-201 |
|    |                          |            | SKGENYLPI | 253-261 |

---

a: related to *M. bovis* HB0801-P1, b: related to P150 and a,b: related to both (*M. bovis* HB0801-P1, and P150).

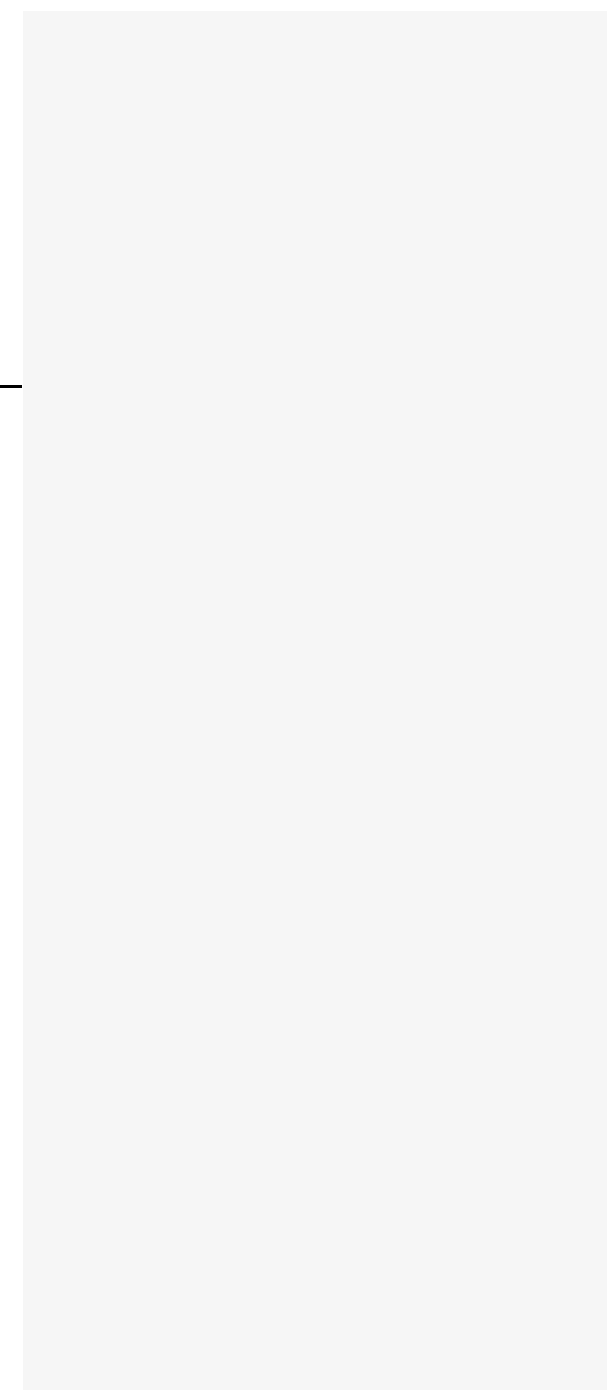

**Table S6** Identification the affinity of T cell epitopes to MHC class II (15-mers) of recognized *M. bovis* secreted proteins by using IEDB-AR

| No | Proteins                 |              | Intermediate affinity binding |          | High affinity binding |          |
|----|--------------------------|--------------|-------------------------------|----------|-----------------------|----------|
|    | Mnemonic                 | Accession No | Sequence                      | Position | Sequence              | Position |
| 1  | Mbov_0016 <sup>a,b</sup> | AFM51394_1   | FYLFLGAAPVLSVPL               | 6-20     |                       |          |
|    |                          |              | YLFLGAAPVLSVPLV               | 7-21     |                       |          |
|    |                          |              | KKNKFYLFLGAAPVL               | 2-16     |                       |          |
|    |                          |              | MKKNKFYLFLGAAPV               | 1-15     |                       |          |
|    |                          |              | QAAYIAGRALADYFS               | 204-218  |                       |          |
|    |                          |              | TKQAAYIAGRALADY               | 202-216  |                       |          |
|    |                          |              | DTKQAAYIAGRALAD               | 201-215  | KFYFLGAAPVLSVP        | 5-19     |
|    |                          |              | FDTKQAAYIAGRALA               | 200-214  | NKFYLFLGAAPVLSV       | 4-18     |
|    |                          |              | IKATASYPVAGSLSS               | 292-306  | KNKFYLFLGAAPVLS       | 3-17     |
|    |                          |              | KQAAYIAGRALADYF               | 203-217  |                       |          |
|    |                          |              | KATASYPVAGSLSSD               | 293-307  |                       |          |
|    |                          |              | SVIKATASYPVAGSL               | 290-304  |                       |          |
|    |                          |              | LKTSFTSGEPVAVAA               | 273-287  |                       |          |
|    |                          |              | KTSFTSGEPVAVAAI               | 274-288  |                       |          |
|    |                          |              | TSFTSGEPVAVAAIN               | 275-289  |                       |          |

|   |                          |            |                 |           |                 |           |
|---|--------------------------|------------|-----------------|-----------|-----------------|-----------|
|   |                          |            | NGKTFSQASIRMAKS | 3284-3298 |                 |           |
|   |                          |            | KTFSQASIRMAKSEK | 3286-3300 |                 |           |
|   |                          |            | EKFEVDLKAITLVDS | 2867-2881 |                 |           |
|   |                          |            | KFEVDLKAITLVDSL | 2868-2882 |                 |           |
|   |                          |            | LFSDYTYNFAEVINR | 2941-2955 |                 |           |
|   |                          |            | FSDYTYNFAEVINRD | 2942-2956 |                 |           |
|   |                          |            | SKYTPFITSSSNPN  | 2629-2643 |                 |           |
|   |                          |            | ELFSDYTYNFAEVIN | 2940-2954 |                 |           |
|   |                          |            | SDYTYNFAEVINRDN | 2943-2957 |                 |           |
|   |                          |            | NELFSDYTYNFAEVI | 2939-2953 |                 |           |
|   |                          |            | PIFVSALTPNATPNI | 2148-2162 |                 |           |
|   |                          |            | TDLRNYAGARKAIED | 473-487   |                 |           |
|   |                          |            | ETDLRNYAGARKAIE | 472-486   |                 |           |
|   |                          |            | YTPTFITSSSNPNGI | 2631-2645 |                 |           |
|   |                          |            | KYTPTFITSSSNPNG | 2630-2644 |                 |           |
|   |                          |            | ITNVVLIKALESHKI | 1137-1151 |                 |           |
| 2 | Mbov_0038 <sup>a,b</sup> | AFM51416_1 | DLRNYAGARKAIEDA | 474-488   | TFSQASIRMAKSEKP | 3287-3301 |
|   |                          |            | DPIFVSALTPNATPN | 2147-2161 | FSQASIRMAKSEKPY | 3288-3302 |
|   |                          |            | IKKLKAEKATLLNKT | 1205-1219 | GKTFSQASIRMAKSE | 3285-3299 |
|   |                          |            | IFVSALTPNATPNIN | 2149-2163 |                 |           |
|   |                          |            | METDLRNYAGARKAI | 471-485   |                 |           |
|   |                          |            | SDPIFVSALTPNATP | 2146-2160 |                 |           |
|   |                          |            | ENGKTFSQASIRMAK | 3283-3297 |                 |           |
|   |                          |            | VRYLKNQKVYALRRP | 260-274   |                 |           |
|   |                          |            | GSDPIFVSALTPNAT | 2145-2159 |                 |           |
|   |                          |            | SIKKLKAEKATLLNK | 1204-1218 |                 |           |
|   |                          |            | LGYKKMVAPSVIKKE | 2013-2027 |                 |           |
|   |                          |            | TNVVLIKALESHKID | 1138-1152 |                 |           |
|   |                          |            | VLGYKKMVAPSVIKE | 2012-2026 |                 |           |
|   |                          |            | ISKYQAAWVTSPFID | 1745-1759 |                 |           |
|   |                          |            | YMETDLRNYAGARKA | 470-484   |                 |           |
|   |                          |            | TNVRYLKNQKVYALR | 258-272   |                 |           |
|   |                          |            | NVRYLKNQKVYALRR | 259-273   |                 |           |
|   |                          |            | DSIKKLKAEKATLLN | 1203-1217 |                 |           |



3 Mbov\_0049<sup>a,b</sup> AFM51424\_1

|                   |           |
|-------------------|-----------|
| TPTFITSSSNPNGIW   | 2632-2646 |
| RKKWEIGAEDTIKTY   | 2848-2862 |
| DRKKWEIGAEDTIKT   | 2847-2861 |
| FVSALTPNATPNINN   | 2150-2164 |
| EDSIKKLKAEKATLL   | 1202-1216 |
| DISKYQAAWVTSPFI   | 1744-1758 |
| PTFITSSSNPNGIWN   | 2633-2647 |
| LRNYAGARKAIEDAD   | 475-489   |
| SKYQAAWVTSPFIDV   | 1746-1760 |
| GAQQKLV DALTEILS  | 620-634   |
| VAELQKQATGLVTKI   | 1615-1629 |
| KVEDSIKKLKAEKAT   | 1200-1214 |
| DISKYQAAWVTSPFI   | 1744-1758 |
| IKNKIDLKSLPALHL   | 1266-1280 |
| GLGEYFNTLIAPAIR   | 1856-1870 |
| DYTYNFAEVINRDNL   | 2944-2958 |
| RDISKYQAAWVTSPF   | 1743-1757 |
| LGEYFNTLIAPAIRD   | 1857-1871 |
| YTYNFAEVINRDNLQ   | 2945-2959 |
| NKVEAIKKLVAPYYE   | 848-862   |
| YHKYQSSEATMRLFD   | 271-285   |
| HKYQSSEATMRLFDD   | 272-286   |
| YYHKYQSSEATMRLF   | 270-284   |
| KYQSSEATMRLFDDE   | 273-287   |
| ESYESQLVQVVDA YE  | 376-390   |
| RESYESQLVQVVDA Y  | 375-389   |
| LYYHKYQSSEATMRL   | 269-283   |
| RLYYHKYQSSEATMR   | 268-282   |
| SYESQLVQVVDA YE E | 377-391   |
| LRESYESQLVQVVDA   | 374-388   |
| YQSSEATMRLFDDE Y  | 274-288   |
| YYHKYQSSEATMRLF   | 270-284   |
| ILKSLQASQSVYEHE   | 646-660   |

|   |                         |            |                 |         |
|---|-------------------------|------------|-----------------|---------|
|   |                         |            | NKLFLYLGTSAVGLA | 6-20    |
|   |                         |            | RNKLFLYLGTSAVGL | 5-19    |
|   |                         |            | KLFLYLGTSAVGLAT | 7-21    |
|   |                         |            | KRNKFLYLGTSAVG  | 4-18    |
|   |                         |            | DAREEWVSAIASHTS | 754-768 |
|   |                         |            | AREEWVSAIASHTSY | 755-769 |
| 4 | Mbov_0111 <sup>ab</sup> | AFM51486_1 | TKRNKFLYLGTSAV  | 3-17    |
|   |                         |            | LFLYLGTSAVGLATP | 8-22    |
|   |                         |            | FLYLGTSAVGLATPL | 9-23    |
|   |                         |            | AGRYYYAGWNPSNRE | 425-439 |
|   |                         |            | LGLSSLRVILVLINS | 789-803 |
|   |                         |            | TAGRYYYAGWNPSNR | 424-438 |
|   |                         |            | GRYYYAGWNPSNREE | 426-440 |
|   |                         |            | SSLKYNTSSAPNDS  | 365-379 |
|   |                         |            | SLKYNTSSAPNDSY  | 366-380 |
| 5 | Mbov_0154 <sup>ab</sup> | AFM51527_1 | PSSLKYNTSSAPND  | 364-378 |
|   |                         |            | IPSSLKYNTSSAPN  | 363-377 |
|   |                         |            | RKEINNMLLVKAYFD | 163-177 |
|   |                         |            | SKNLEKAIEAFAHL  | 421-435 |
| 6 | Mbov_0217 <sup>ab</sup> | AFM51586_1 | KEINNMLLVKAYFDI | 164-178 |
|   |                         |            | KNLLEKAIEAFAHLG | 422-436 |
|   |                         |            | NLLEKAIEAFAHLGV | 423-437 |

|   |                        |            |                 |         |                 |         |
|---|------------------------|------------|-----------------|---------|-----------------|---------|
|   |                        |            | RSAYVSIKSIRDFEK | 521-535 |                 |         |
|   |                        |            | AKYSGYIMPLASVVN | 472-486 |                 |         |
|   |                        |            | FAKYSYIMPLASVV  | 471-485 |                 |         |
|   |                        |            | KYSGYIMPLASVVND | 473-487 |                 |         |
|   |                        |            | LNFLRSAYVSIKSIR | 517-531 |                 |         |
|   |                        |            | SAYVSIKSIRDFEKD | 522-536 |                 |         |
|   |                        |            | KKVVFQFAQSNSWPL | 29-43   |                 |         |
|   |                        |            | VDEKATIVQKATEAG | 186-200 |                 |         |
|   |                        |            | YSGYIMPLASVVNDE | 474-488 |                 |         |
|   |                        |            | KVVFQFAQSNSWPLP | 30-44   |                 |         |
| 7 | Mbov_0274 <sup>a</sup> | AFM51642_1 | VVFQFAQSNSWPLPK | 31-45   | FLRSAYVSIKSIRDF | 519-533 |
|   |                        |            | SGYIMPLASVVNDES | 475-489 | LRSAYVSIKSIRDFE | 520-534 |
|   |                        |            | NVDEKATIVQKATEA | 185-199 | NFLRSAYVSIKSIRD | 518-532 |
|   |                        |            | IIPLAVAAPMIAASC | 10-24   |                 |         |
|   |                        |            | GIPLAVAAPMIAAS  | 9-23    |                 |         |
|   |                        |            | IPLAVAAPMIAASCQ | 11-25   |                 |         |
|   |                        |            | FGIPLAVAAPMIAA  | 8-22    |                 |         |
|   |                        |            | FQFAQSNSWPLPKML | 33-47   |                 |         |
|   |                        |            | VFQFAQSNSWPLPKM | 32-46   |                 |         |
|   |                        |            | GNVDEKATIVQKATE | 184-198 |                 |         |
|   |                        |            | DEKATIVQKATEAGR | 187-201 |                 |         |
|   |                        |            | SKDSSMNKAVAKFVK | 436-450 |                 |         |

|   |                        |            |                 |         |
|---|------------------------|------------|-----------------|---------|
| 8 | Mbov_0290 <sup>b</sup> | AFM51658_1 | ISKIAITASKAKELA | 268-282 |
|   |                        |            | KALVATKEAKAKLTK | 136-150 |
|   |                        |            | DKISKIAITASKAKE | 266-280 |
|   |                        |            | LDKISKIAITASKAK | 265-279 |
|   |                        |            | KISKIAITASKAKEL | 267-281 |
|   |                        |            | ILDKISKIAITASKA | 264-278 |
|   |                        |            | DKALVATKEAKAKLT | 135-149 |
|   |                        |            | FGKSAKVVQDAVDAH | 78-92   |
|   |                        |            | KSAKVVQDAVDAHKK | 80-94   |
|   |                        |            | FDKALVATKEAKAKL | 134-148 |
|   |                        |            | VLEKSIKAAESIKKG | 156-170 |
|   |                        |            | VFGKSAKVVQDAVDA | 77-91   |
|   |                        |            | DFDKALVATKEAKAK | 133-147 |
|   |                        |            | GKSAKVVQDAVDAHH | 79-93   |
|   |                        |            | KDMEAKMELIKLKP  | 431-445 |
|   |                        |            | LKKLFDKAKANKNKK | 235-249 |
|   |                        |            | DMEAKMELIKLKP   | 432-446 |



|    |                          |            |                 |         |
|----|--------------------------|------------|-----------------|---------|
|    |                          |            | LTSNLSFSAANALVA | 521-535 |
|    |                          |            | TSNLSFSAANALVAY | 522-536 |
|    |                          |            | SNLSFSAANALVAYT | 523-537 |
|    |                          |            | AGQLRTKLAALRERA | 350-364 |
|    |                          |            | NLSFSAANALVAYTA | 524-538 |
|    |                          |            | LSFSAANALVAYTAA | 525-539 |
|    |                          |            | LLTSNLSFSAANALV | 520-534 |
|    |                          |            | KNYQIYHANGASLKF | 102-116 |
|    |                          |            | NKNYQIYHANGASLK | 101-115 |
|    |                          |            | NAGQLRTKLAALRER | 349-363 |
|    |                          |            | LSFSAANALVAYTAA | 525-539 |
|    |                          |            | NYQIYHANGASLKFN | 103-117 |
|    |                          |            | FLLTSNLSFSAANAL | 519-533 |
|    |                          |            | YQIYHANGASLKFNW | 104-118 |
|    |                          |            | LELMKYALDVIQRRS | 432-446 |
| 9  | Mbov_0296 <sup>b</sup>   | AFM51664_1 | SFSAANALVAYTAAD | 526-540 |
|    |                          |            | SLELMKYALDVIQRR | 431-445 |
|    |                          |            | LNAGQLRTKLAALRE | 348-362 |
|    |                          |            | FSAANALVAYTAADK | 527-541 |
|    |                          |            | GQLRTKLAALRERAI | 351-365 |
|    |                          |            | NLSFSAANALVAYTA | 524-538 |
|    |                          |            | ELMKYALDVIQRSM  | 433-447 |
|    |                          |            | IPYVSVKQALSALEG | 69-83   |
|    |                          |            | SAANALVAYTAADKS | 528-542 |
|    |                          |            | DNKSAVITLDSFSAA | 400-414 |
|    |                          |            | PYVSVKQALSALEGV | 70-84   |
|    |                          |            | QLRTKLAALRERAIY | 352-366 |
|    |                          |            | VSVKQALSALEGVVN | 72-86   |
|    |                          |            | YVSVKQALSALEGVV | 71-85   |
|    |                          |            | LRTKLAALRERAIYH | 353-367 |
|    |                          |            | RIPYVSVKQALSALE | 68-82   |
|    |                          |            | KTQFYAGYPATQLGM | 536-550 |
| 10 | Mbov_0350 <sup>a,b</sup> | AFM51716_1 | LKTQFYAGYPATQLG | 535-549 |
|    |                          |            | PLKTQFYAGYPATQL | 534-548 |

|    |                          |            |                 |         |
|----|--------------------------|------------|-----------------|---------|
|    |                          |            | IALATAIAVPVTLQQ | 16-30   |
|    |                          |            | TIALATAIAVPVTLQ | 15-29   |
|    |                          |            | GTIALATAIAVPVTL | 14-28   |
| 11 | Mbov_0364 <sup>a,b</sup> | AFM51726_1 | IGTIALATAIAVPVT | 13-27   |
|    |                          |            | ALATAIAVPVTLQQK | 17-31   |
|    |                          |            | MKKKLTIALSSVIGT | 1-15    |
|    |                          |            | LATAIAVPVTLQQKN | 18-32   |
|    |                          |            | VIGTIALATAIAVPV | 12-26   |
|    |                          |            | IKKTKLKDVLPKLAS | 461-475 |
|    |                          |            | EGASGSMIDSSFNV  | 613-627 |
|    |                          |            | YQKTQFFNPSIPIGH | 128-142 |
| 12 | Mbov_0374 <sup>b</sup>   | AFM51736_1 | GASGSMIDSSFNVI  | 614-628 |
|    |                          |            | QKTQFFNPSIPIGHY | 129-143 |
|    |                          |            | KIKKTKLKDVLPKLA | 460-474 |
|    |                          |            | KTQFFNPSIPIGHYL | 130-144 |
|    |                          |            | EAKTPIKRADKHFLA | 43-57   |
|    |                          |            | FDFSKFDPSKPFPI  | 406-420 |
|    |                          |            | DFSKFDPSKPFPI   | 407-421 |
|    |                          |            | KDFSKFDPSKPFPI  | 405-419 |
|    |                          |            | FSKFDPSKPFPI    | 408-422 |
|    |                          |            | SKFDPSKPFPI     | 409-423 |
| 13 | Mbov_0468 <sup>a,b</sup> | AFM51824_1 | FSSLYYGASGLAYN  | 471-485 |
|    |                          |            | NFSSLYYGASGLAY  | 470-484 |
|    |                          |            | MMSKQKLLLIPMLSS | 1-15    |
|    |                          |            | SSLYYGASGLAYNE  | 472-486 |
|    |                          |            | SLYYGASGLAYNEY  | 473-487 |
|    |                          |            | SKYLQTVDYVSAFKT | 343-357 |
|    |                          |            | LYYGASGLAYNEYG  | 474-488 |

|    |                          |            |                  |         |
|----|--------------------------|------------|------------------|---------|
|    |                          |            | IGYKTFGGASAI SYA | 468-82  |
|    |                          |            | VIGYKTFGGASAI SY | 467-481 |
|    |                          |            | GYKTFGGASAI SYAI | 469-483 |
|    |                          |            | KVIGYKTFGGASAI S | 466-480 |
|    |                          |            | GKVIGYKTFGGASAI  | 465-479 |
|    |                          |            | DFNYYVLTSPYAFSA  | 437-451 |
|    |                          |            | FNYYVLTSPYAFSAG  | 438-452 |
| 14 | Mbov_0471 <sup>a,b</sup> | AFM51827_1 | YDFNYYVLTSPYAFS  | 436-450 |
|    |                          |            | KYDFNYYVLTSPYAF  | 435-449 |
|    |                          |            | NYYVLTSPYAFSAGN  | 439-453 |
|    |                          |            | FDESALKEFLIIPLA  | 32-46   |
|    |                          |            | YKTFGGASAI SYAIL | 470-484 |
|    |                          |            | YVLTSPYAFSAGNIF  | 441-455 |
|    |                          |            | LTSPYAFSAGNIFPQ  | 443-457 |
|    |                          |            | AKSFKISLPKPSNSK  | 98-112  |
|    |                          |            | IAKSFKISLPKPSNS  | 97-111  |
|    |                          |            | KSFKISLPKPSNSKD  | 99-113  |
|    |                          |            | PIAKSFKISLPKPSN  | 96-110  |
|    |                          |            | PPIAKSFKISLPKPS  | 95-109  |
|    |                          |            | PVNFRYGGADSNKEL  | 210-224 |
|    |                          |            | VNFRYGGADSNKELL  | 211-225 |
| 15 | Mbov_0505 <sup>a,b</sup> | AFM51861_1 | LLRLRIKKANLAQIL  | 565-579 |
|    |                          |            | NPVNFRYGGADSNKE  | 209-223 |
|    |                          |            | VLLRLRIKKANLAQI  | 564-578 |
|    |                          |            | SFKISLPKPSNSKDT  | 100-114 |
|    |                          |            | FVLLRLRIKKANLAQ  | 563-577 |
|    |                          |            | GNPVNFRYGGADSNK  | 208-222 |
|    |                          |            | FKISLPKPSNSKDTE  | 101-115 |
|    |                          |            | SGNPVNFRYGGADSN  | 207-221 |
|    |                          |            | DFVLLRLRIKKANLA  | 562-576 |

|    |                         |            |                 |         |
|----|-------------------------|------------|-----------------|---------|
|    |                         |            | GDHKWYKQLAVQEGQ | 661-675 |
|    |                         |            | DHKWYKQLAVQEGQQ | 662-676 |
|    |                         |            | DNYNSIDVPLAVDEK | 597-611 |
|    |                         |            | NFTKFSFSKPSGIK  | 489-503 |
|    |                         |            | LDNYNSIDVPLAVDE | 596-610 |
|    |                         |            | PNFTKFSFSKPSGII | 488-502 |
| 16 | Mbov_0515 <sup>ab</sup> | AFM51869_1 | NGDHKWYKQLAVQEG | 660-674 |
|    |                         |            | DPNFTKFSFSKPSGI | 487-501 |
|    |                         |            | NYNSIDVPLAVDEKI | 598-612 |
|    |                         |            | FTKFSFSKPSGIIKT | 490-504 |
|    |                         |            | YLDNYNSIDVPLAVD | 595-609 |
|    |                         |            | YNSIDVPLAVDEKIK | 599-613 |
|    |                         |            | HKWYKQLAVQEGQQP | 663-677 |
|    |                         |            | TKFSFSKPSGIKTV  | 491-505 |
|    |                         |            | LNKYYQYSDALKAGG | 702-716 |
|    |                         |            | NLNKYYQYSDALKAG | 701-715 |
|    |                         |            | DNLNKYYQYSDALKA | 700-714 |
|    |                         |            | NKYYQYSDALKAGGK | 703-717 |
|    |                         |            | KYYQYSDALKAGGKK | 704-718 |
| 17 | Mbov_0516 <sup>ab</sup> | AFM51870_1 | VSSQYPPNTPIATRI | 531-545 |
|    |                         |            | YNVSSQYPPNTPIAT | 529-543 |
|    |                         |            | NVSSQYPPNTPIATR | 530-544 |
|    |                         |            | SSQYPPNTPIATRIS | 532-546 |
|    |                         |            | SQYPPNTPIATRISF | 533-547 |
|    |                         |            | KVEEVKPPTAAPEP  | 97-111  |



|    |                          |            |                 |         |                 |       |
|----|--------------------------|------------|-----------------|---------|-----------------|-------|
|    |                          |            | GGVLSIASAVAIYKA | 19-33   |                 |       |
|    |                          |            | EELRKKTVEKALTSG | 179-193 |                 |       |
|    |                          |            | TEELRKKTVEKALTS | 178-192 |                 |       |
|    |                          |            | LRKKTVEKALTSGDG | 181-195 |                 |       |
|    |                          |            | ELRKKTVEKALTSGD | 180-194 |                 |       |
|    |                          |            | IASAVAIYKATSDFN | 24-38   |                 |       |
|    |                          |            | VTEELRKKTVEKALT | 177-191 |                 |       |
|    |                          |            | ASAVAIYKATSDFN  | 25-39   | VLSIASAVAIYKATS | 21-35 |
| 18 | Mbov_0517 <sup>a,b</sup> | AFM51871_1 | QRRQITLNGVQVYAT | 126-140 | LSIASAVAIYKATSD | 22-36 |
|    |                          |            | NTQRRQITLNGVQVY | 124-138 | SIASAVAIYKATSD  | 23-37 |
|    |                          |            | QLELFFSANATNTSS | 465-479 | GVLSIASAVAIYKAT | 20-34 |
|    |                          |            | LELFFSANATNTSSL | 466-480 |                 |       |
|    |                          |            | ELFFSANATNTSLI  | 467-481 |                 |       |
|    |                          |            | TQRRQITLNGVQVYA | 125-139 |                 |       |
|    |                          |            | PQLELFFSANATNTS | 464-478 |                 |       |
|    |                          |            | RRQITLNGVQVYATV | 127-141 |                 |       |
|    |                          |            | LFFSANATNTSSLIA | 468-482 |                 |       |
|    |                          |            | PNTQRRQITLNGVQV | 123-137 |                 |       |
|    |                          |            | TNSSAKTGLAAVFRS | 765-779 |                 |       |
|    |                          |            | MAKMKKILTLSTIPF | 1-15    |                 |       |
| 19 | Mbov_0518 <sup>b</sup>   | AFM51872_1 | NSSAKTGLAAVFRSY | 766-780 |                 |       |
|    |                          |            | NPMYMAMLKNILSQG | 190-204 |                 |       |
|    |                          |            | TTNSSAKTGLAAVFR | 764-778 |                 |       |
|    |                          |            | NVSRDFRPNTSIPTR | 519-533 |                 |       |
| 20 | Mbov_0519 <sup>a,b</sup> | AFM51873_1 | VSRDFRPNTSIPTRI | 520-534 |                 |       |
|    |                          |            | SRDFRPNTSIPTRIT | 521-535 |                 |       |
|    |                          |            | YNVSRDFRPNTSIPT | 518-532 |                 |       |
|    |                          |            | LIFDSNKAIKILKYI | 224-238 |                 |       |
|    |                          |            | FDSNKAIKILKYIED | 226-240 |                 |       |
| 21 | Mbov_0536 <sup>a,b</sup> | AFM51890_1 | IFDSNKAIKILKYIE | 225-239 |                 |       |
|    |                          |            | YLIFDSNKAIKILKY | 223-237 |                 |       |
|    |                          |            | DSNKAIKILKYIEDD | 227-241 |                 |       |
|    |                          |            | KAKNAIQKHLSDWY  | 114-128 |                 |       |

22 Mbov\_0570<sup>ab</sup> AFM51924\_1

|                 |         |                 |         |
|-----------------|---------|-----------------|---------|
| GTLSSAKAKIRIATS | 288-302 |                 |         |
| TLSSAKAKIRIATSL | 289-303 |                 |         |
| DGTLSSAKAKIRIAT | 287-301 |                 |         |
| SGGYASARAFYADNV | 461-475 |                 |         |
| QLFSGGYASARAFYA | 458-472 |                 |         |
| GGYASARAFYADNVV | 462-476 |                 |         |
| FSGGYASARAFYADN | 460-474 |                 |         |
| LFSGGYASARAFYAD | 459-473 |                 |         |
| LGENRTIKVAPTUSA | 576-590 | LSSAKAKIRIATSLF | 290-304 |
| IGFSALIPVLSARCN | 15-29   | SSAKAKIRIATSLFD | 291-305 |
| QFTKQNIKAPAFATE | 423-437 | SAKAKIRIATSLFDD | 292-306 |
| AIGFSALIPVLSARC | 14-28   | MKSRKIKALFISQAI | 1-15    |
| DKQFTKQNIKAPAF  | 421-435 |                 |         |
| KQFTKQNIKAPAFAT | 422-436 |                 |         |
| LFSGGYASARAFYAD | 459-473 |                 |         |
| FSGGYASARAFYADN | 460-474 |                 |         |
| AKAKIRIATSLFDDK | 293-307 |                 |         |
| GFSALIPVLSARCND | 16-30   |                 |         |
| NSQLFSGGYASARAF | 456-470 |                 |         |
| GENRTIKVAPTUSAD | 577-591 |                 |         |

|    |                         |            |                 |         |                 |         |
|----|-------------------------|------------|-----------------|---------|-----------------|---------|
|    |                         |            | LSSTAIPLLAAVSAK | 11-25   |                 |         |
|    |                         |            | MIGLSSTAIPLLAAV | 8-22    |                 |         |
|    |                         |            | LKSIQVMSANAPVLQ | 175-189 |                 |         |
|    |                         |            | MIPMLKSIQVMSANA | 171-185 |                 |         |
|    |                         |            | FMIPMLKSIQVMSAN | 170-184 |                 |         |
|    |                         |            | LMIGLSSTAIPLLAA | 7-21    |                 |         |
| 23 | Mbov_0579 <sup>ab</sup> | AFM51933_1 | MLKSIQVMSANAPVL | 174-188 | GLSSTAIPLLAAVSA | 10-24   |
|    |                         |            | TFMIPMLKSIQVMSA | 169-183 | IPMLKSIQVMSANAP | 172-186 |
|    |                         |            | YGSLASRLASSEMRD | 112-126 | IGLSSTAIPLLAAVS | 9-23    |
|    |                         |            | NYGSLASRLASSEMR | 111-125 | PMLKSIQVMSANAPV | 173-187 |
|    |                         |            | FNYGSLASRLASSEM | 110-124 |                 |         |
|    |                         |            | AFNYGSLASRLASSE | 109-123 |                 |         |
|    |                         |            | KLMIGLSSTAIPLLA | 6-20    |                 |         |
|    |                         |            | LAFNYGSLASRLASS | 108-122 |                 |         |
|    |                         |            | STAIPLLAAVSAKCG | 13-27   |                 |         |
|    |                         |            | FLKIYSLTPPSIDEN | 86-100  |                 |         |
|    |                         |            | SVYNSFESNKASAFE | 155-169 |                 |         |
|    |                         |            | NSVYNSFESNKASAF | 154-168 |                 |         |
| 24 | Mbov_0580 <sup>ab</sup> | AFM51934_1 | YFLKIYSLTPPSIDE | 85-99   |                 |         |
|    |                         |            | DYFLKIYSLTPPSID | 84-98   |                 |         |
|    |                         |            | LKIYSLTPPSIDENT | 87-101  |                 |         |
|    |                         |            | VYNSFESNKASAFEF | 156-170 |                 |         |
|    |                         |            | KIYSLTPPSIDENTV | 88-102  |                 |         |
|    |                         |            | LNSVYNSFESNKASA | 153-167 |                 |         |

|    |                          |            |                  |         |
|----|--------------------------|------------|------------------|---------|
|    |                          |            | YEYGYLLALPPINFL  | 227-241 |
|    |                          |            | EYGYLLALPPINFLR  | 228-242 |
|    |                          |            | NYEYGYLLALPPINF  | 226-240 |
|    |                          |            | NNYGYLLALPPIN    | 225-239 |
|    |                          |            | YGYLLALPPINFLRN  | 229-243 |
|    |                          |            | YGTTSIQIVKLIQDI  | 317-331 |
|    |                          |            | KNYGTTSIQIVKLIQ  | 315-329 |
|    |                          |            | NYGTTSIQIVKLIQD  | 316-330 |
| 25 | Mbov_0585 <sup>a,b</sup> | AFM51939_1 | MKKNYGTTSIQIVKLI | 314-328 |
|    |                          |            | SSVSAFTLPIVSAS   | 12-26   |
|    |                          |            | SSVSAFTLPIVSASC  | 13-27   |
|    |                          |            | GYLLALPPINFLRNY  | 230-244 |
|    |                          |            | SVSAFTLPIVSASCI  | 14-28   |
|    |                          |            | KNNYGYLLALPPI    | 224-238 |
|    |                          |            | TMKNYGTTSIQIVKL  | 313-327 |
|    |                          |            | NKNNYGYLLALPP    | 223-237 |
|    |                          |            | YLLALPPINFLRNYD  | 231-245 |
|    |                          |            | DFNYFVLTAPVSFSA  | 436-450 |
| 26 | Mbov_0658 <sup>a,b</sup> | AFM52009_1 | FNYFVLTAPVSFSAG  | 437-451 |
|    |                          |            | YDFNYFVLTAPVSFS  | 435-449 |
|    |                          |            | LIAGISVGAASGVAV  | 616-630 |

|    |                          |            |                 |         |
|----|--------------------------|------------|-----------------|---------|
| 27 | Mbov_0674 <sup>a,b</sup> | AFM52024_1 | EAQFNSGRSNASEHS | 70-84   |
|    |                          |            | EEAQFNSGRSNASEH | 69-83   |
|    |                          |            | KAYFKTQALASVIFN | 107-121 |
|    |                          |            | KEEAQFNSGRSNASE | 68-82   |
|    |                          |            | AQFNSGRSNASEHSG | 71-85   |
|    |                          |            | EKEEAQFNSGRSNAS | 67-81   |
|    |                          |            | AYFKTQALASVIFNQ | 108-122 |
|    |                          |            | FKWIYTYAGLVISSS | 16-30   |
|    |                          |            | YFKTQALASVIFNQK | 109-123 |
|    |                          |            | KFKWIYTYAGLVISS | 15-29   |
|    |                          |            | KKFKWIYTYAGLVIS | 14-28   |
|    |                          |            | KWIYTYAGLVISSSS | 17-31   |
|    |                          |            | SKAYFKTQALASVIF | 106-120 |
|    |                          |            | WIYTYAGLVISSSSL | 18-32   |
|    |                          |            | KELSFEGAGSSELNE | 262-276 |
|    |                          |            | NKELSFEGAGSSELN | 261-275 |
|    |                          |            | ELSFEGAGSSELNEA | 263-277 |
|    |                          |            | LSFEGAGSSELNEAH | 264-278 |
|    |                          |            | SNKELSFEGAGSSEL | 260-274 |



28 Mbov\_0675<sup>a,b</sup> AFM52025\_1

|                  |         |                 |       |
|------------------|---------|-----------------|-------|
| LGLGAISAFAAIPMV  | 7-21    |                 |       |
| VAKEMKYQAVAIGNH  | 184-198 |                 |       |
| KFILGLGAISAFAAI  | 4-18    |                 |       |
| AKEMKYQAVAIGNHE  | 185-199 |                 |       |
| KVAKEMKYQAVAIGN  | 183-197 |                 |       |
| SKVAKEMKYQAVAIG  | 182-196 |                 |       |
| AFAAIPMVAATCGVS  | 14-28   |                 |       |
| ASKVFSGAYAQYSHN  | 548-562 |                 |       |
| SSPKQVAKARAAAYDE | 28-42   |                 |       |
| GASKVFSGAYAQYSH  | 547-561 |                 |       |
| RKFILGLGAISAFAA  | 3-17    | GAISAFAAIPMVAAT | 10-24 |
| HGASKVFSGAYAQYS  | 546-560 | LGASAFAAIPMVAA  | 9-23  |
| GNRIAAVQVKGSVLL  | 527-541 | AISAFAAIPMVAATC | 11-25 |
| FAAIPMVAATCGVSS  | 15-29   | ISAFAAIPMVAATCG | 12-26 |
| FGNRIAAVQVKGSVL  | 526-540 | GLGAISAFAAIPMVA | 8-22  |
| VSSPKQVAKARAAAYD | 27-41   | SAFAAIPMVAATCGV | 13-27 |
| VKGSVLEAMKHGAS   | 535-549 |                 |       |
| NRIAAVQVKGSVLE   | 528-542 |                 |       |
| ILGLGAISAFAAIPM  | 6-20    |                 |       |
| PFGNRIAAVQVKGSV  | 525-539 |                 |       |
| GAISAFAAIPMVAAT  | 10-24   |                 |       |
| KVFSGAYAQYSHNVS  | 550-564 |                 |       |
| LGASAFAAIPMVAA   | 9-23    |                 |       |
| SKVFSGAYAQYSHNV  | 549-563 |                 |       |
| AISAFAAIPMVAATC  | 11-25   |                 |       |

|    |                         |            |                  |         |
|----|-------------------------|------------|------------------|---------|
|    |                         |            | MLRSAQLSLESLLKV  | 546-560 |
|    |                         |            | LRSAQLSLESLLKVE  | 547-561 |
|    |                         |            | NMLRSAQLSLESLLK  | 545-559 |
|    |                         |            | RSAQLSLESLLKVEK  | 548-562 |
|    |                         |            | ARTSGYIMPLASVVT  | 493-507 |
|    |                         |            | RTSGYIMPLASVVTE  | 494-508 |
|    |                         |            | IARTSGYIMPLASVV  | 492-506 |
|    |                         |            | TSQMSNTVMQAMIEQ  | 576-590 |
|    |                         |            | SQMSNTVMQAMIEQT  | 577-591 |
|    |                         |            | TSGYIMPLASVVTEA  | 495-509 |
|    |                         |            | KTSQMSNTVMQAMIE  | 575-589 |
|    |                         |            | QIFRFQSAISFAASV  | 378-392 |
|    |                         |            | SGYIMPLASVVTEAT  | 496-510 |
|    |                         |            | LNMLRSAQLSLESLL  | 544-558 |
|    |                         |            | WQIFRFQSAISFAAS  | 377-391 |
|    |                         |            | SWQIFRFQSAISFAA  | 376-390 |
| 29 | Mbov_0739 <sup>ab</sup> | AFM52087_1 | QMSNTVMQAMIEQTE  | 578-592 |
|    |                         |            | IFRFQSAISFAASVG  | 379-393 |
|    |                         |            | KIFIKAGAILLPAAA  | 3-17    |
|    |                         |            | FRFQSAISFAASVGA  | 380-394 |
|    |                         |            | IFRFQSAISFAASVG  | 379-393 |
|    |                         |            | QIFRFQSAISFAASV  | 378-392 |
|    |                         |            | DKTSQMSNTVMQAMI  | 574-588 |
|    |                         |            | FRFQSAISFAASVGA  | 380-394 |
|    |                         |            | SAQLSLESLLKVEKG  | 549-563 |
|    |                         |            | YGEYQLLKKVAHAIE  | 94-108  |
|    |                         |            | EYGEYQLLKKVAHAI  | 93-107  |
|    |                         |            | QSAISFAASVGAYQN  | 383-397 |
|    |                         |            | SAISFAASVGAYQNK  | 384-398 |
|    |                         |            | IKAGAILLPAAAGLS  | 6-20    |
|    |                         |            | KAGAILLPAAAGLSV  | 7-21    |
|    |                         |            | KLNMLRSAQLSLESLL | 543-557 |
|    |                         |            | KKIFIKAGAILLPAA  | 2-16    |
|    |                         |            | WQIFRFQSAISFAAS  | 377-391 |

|    |                          |            |                 |         |
|----|--------------------------|------------|-----------------|---------|
|    |                          |            | DDKTSQMSNTVMQAM | 573-587 |
|    |                          |            | GVNFLPYNSSAIINK | 269-283 |
| 30 | Mbov_0743 <sup>a,b</sup> | AFM52091_1 | DGVNFLPYNSSAIIN | 268-282 |
|    |                          |            | VNFLPYNSSAIINKF | 270-284 |
|    |                          |            | HDGVNFLPYNSSAI  | 267-281 |
|    |                          |            | GSVASLASIPVAAK  | 10-24   |
|    |                          |            | SVASLASIPVAAKC  | 11-25   |
|    |                          |            | LGSVASLASIPVAA  | 9-23    |
|    |                          |            | VASLASIPVAAKCG  | 12-26   |
|    |                          |            | KIEAAIKEAIVAKVP | 154-168 |
| 31 | Mbov_0798 <sup>a,b</sup> | AFM52146_1 | EKIEAAIKEAIVAKV | 153-167 |
|    |                          |            | AAIKEAIVAKVPTLK | 157-171 |
|    |                          |            | LLGSVASLASIPFVA | 8-22    |
|    |                          |            | EAAIKEAIVAKVPTL | 156-170 |
|    |                          |            | KIEAAIKEAIVTKVP | 68-82   |
|    |                          |            | SKFLLGSVASLASI  | 4-18    |
|    |                          |            | IEAAIKEAIVAKVPT | 155-169 |

---

a: related to *M. bovis* HB0801-P1, b: related to P150 and a,b: related to both (*M. bovis* HB0801-P1, and P150).



**Table S7** Overlapped MHC class I and II T cell epitopes in recognized *M. bovis* secreted antigenic proteins predicted by using IEDB-AR.

| No | Proteins                |              | MHC class I |                         | MHC class II            |          |                         |         |
|----|-------------------------|--------------|-------------|-------------------------|-------------------------|----------|-------------------------|---------|
|    | Mnemonic                | Accession No | Sequence    | Position                | Sequence                | Position |                         |         |
| 1  | Mbov_0016 <sup>ab</sup> | AFM51394_1   | KFYFLFGAA   | 5-13                    | <u>KFYFLGAA</u> PVLSVP  | 5-19     |                         |         |
|    |                         |              |             |                         | N <u>KFYFLGAA</u> PVLSV | 4-18     |                         |         |
|    |                         |              |             |                         | KN <u>KFYFLGAA</u> PVLS | 3-17     |                         |         |
|    |                         |              |             |                         | FYLFLGAA <u>PVLSVPL</u> | 6-20     |                         |         |
|    |                         |              |             |                         | AAPVLSVPL               | 12-20    | FDTKQAAYI <u>AGRALA</u> | 200-214 |
|    |                         |              |             |                         | FDTKQAAYI               | 200-208  | <u>QAAYIAGRALADYFS</u>  | 204-218 |
|    |                         |              |             |                         | AAYIAGRAL               | 205-213  | <u>KQAAYIAGRALADYF</u>  | 203-217 |
|    |                         |              |             |                         |                         |          | IKAT <u>ASYPVAGSLSS</u> | 292-306 |
|    |                         |              |             |                         | ASYPVAGSL               | 296-304  | KAT <u>ASYPVAGSLSSD</u> | 293-307 |
|    |                         |              |             |                         |                         |          | SVIKAT <u>ASYPVAGSL</u> | 290-304 |
|    |                         |              |             | KTSFTS <u>GEPVAVAAI</u> | 274-288                 |          |                         |         |
|    |                         | GEPVAVAAI    | 280-288     | TSFTS <u>GEPVAVAAIN</u> | 275-289                 |          |                         |         |

|           |                         |                               |           |           |                               |           |
|-----------|-------------------------|-------------------------------|-----------|-----------|-------------------------------|-----------|
| 2         | Mbov_0038 <sup>ab</sup> | AFM51416_1                    | NYAGARKAI | 477-485   | TDLRNYAGARKAIED               | 473-487   |
|           |                         |                               |           |           | ETDLRNYAGARKAIE               | 472-486   |
|           |                         |                               |           |           | DLRNYAGARKAIEDA               | 474-488   |
|           |                         |                               |           |           | METDLRNYAGARKAI               | 471-485   |
|           |                         |                               |           |           | LRNYAGARKAIEDAD               | 475-489   |
|           |                         |                               | WEIGAEDTI | 2851-2859 | RKKWEIGAEDTIKTY               | 2848-2862 |
|           |                         |                               |           |           | DRKKWEIGAEDTIKT               | 2847-2861 |
|           |                         |                               | KAITLVDSL | 2874-2882 | KFEVDLKAITLVDSL               | 2868-2882 |
|           |                         |                               | YTYNFAEVI | 2945-2953 | LFSDYTYNFAEVI <sup>NR</sup>   | 2941-2955 |
|           |                         |                               |           |           | FSDYTYNFAEVI <sup>NRD</sup>   | 2942-2956 |
|           |                         |                               |           |           | ELFSDYTYNFAEVI <sup>N</sup>   | 2940-2954 |
|           |                         |                               |           |           | SDYTYNFAEVI <sup>NRDN</sup>   | 2943-2957 |
|           |                         |                               |           |           | NELFSDYTYNFAEVI               | 2939-2953 |
|           |                         |                               |           |           | DYTYNFAEVI <sup>NRDNL</sup>   | 2944-2958 |
| 3         | Mbov_0049 <sup>ab</sup> | AFM51424_1                    | KYQAAWVTS | 1747-1755 | ISKYQAAWVTSPFID               | 1745-1759 |
|           |                         |                               |           |           | DISKYQAAWVTSPFI               | 1744-1758 |
|           |                         |                               |           |           | SKYQAAWVTSPFIDV               | 1746-1760 |
|           |                         |                               |           |           | DISKYQAAWVTSPFI               | 1744-1758 |
|           |                         |                               |           |           | RDISKYQAAWVTSPF               | 1743-1757 |
|           |                         |                               | VDLKAITLV | 2871-2879 | EKFEVDLKAITLVDS               | 2867-2881 |
|           |                         |                               |           |           | KFEVDLKAITLVDSL               | 2868-2882 |
|           |                         |                               | KYQSSEATM | 273-281   | YHKYQSSEATM <sup>R</sup> RLFD | 271-285   |
|           |                         |                               |           |           | HKYQSSEATM <sup>R</sup> RLFDD | 272-286   |
|           |                         |                               |           |           | YYHKYQSSEATM <sup>R</sup> RLF | 270-284   |
|           |                         | KYQSSEATM <sup>R</sup> RLFDDE | 273-287   |           |                               |           |
|           |                         | LYYHKYQSSEATM <sup>R</sup> L  | 269-283   |           |                               |           |
|           |                         | RLYYHKYQSSEATM <sup>R</sup>   | 268-282   |           |                               |           |
|           |                         | YYHKYQSSEATM <sup>R</sup> RLF | 270-284   |           |                               |           |
|           |                         | ESYESQLVQVV <sup>DAYE</sup>   | 376-390   |           |                               |           |
| YESQLVQVV | 378-386                 | RESYESQLVQVV <sup>DAY</sup>   | 375-389   |           |                               |           |
| SYESQLVQV | 377-385                 | SYESQLVQVV <sup>DAYEE</sup>   | 377-391   |           |                               |           |
|           |                         | LRESYESQLVQVV <sup>DA</sup>   | 374-388   |           |                               |           |

|                 |                         |                 |           |         |                        |                        |                 |           |
|-----------------|-------------------------|-----------------|-----------|---------|------------------------|------------------------|-----------------|-----------|
| 4               | Mbov_0111 <sup>ab</sup> | AFM51486_1      | AGRYYYAGW | 425-433 | <u>AGRYYYAGWNPSNRE</u> | 425-439                |                 |           |
|                 |                         |                 | YYYAGWNPS | 428-436 | <u>TAGRYYYAGWNPSNR</u> | 424-438                |                 |           |
| 5               | Mbov_0154 <sup>ab</sup> | AFM51527_1      | SAVGLATPL | 428-436 | <u>GRYYYAGWNPSNREE</u> | 426-440                |                 |           |
|                 |                         |                 | KYNTSSSAP | 368-376 | FLYLGTSAVGLATPL        | 9-23                   |                 |           |
|                 |                         |                 |           |         | SSLKYNTSSSAPNDS        | 365-379                |                 |           |
| 6               | Mbov_0217 <sup>ab</sup> | AFM51586_1      | KAIEAFAHL | 427-435 | SLKYNTSSSAPNDSY        | 366-380                |                 |           |
|                 |                         |                 |           |         | IEAFAHLGV              | 429-437                | PSSLKYNTSSSAPND | 364-378   |
|                 |                         |                 | KEINNMLLV | 164-172 | IPSSLYNTSSSAPN         | 363-377                |                 |           |
|                 |                         |                 |           |         | KNLLEKAIEAFAHL         | 421-435                |                 |           |
|                 |                         |                 |           |         | KNLLEKAIEAFAHLG        | 422-436                |                 |           |
|                 |                         |                 |           |         | NLLEKAIEAFAHLGV        | 423-437                |                 |           |
| FAQSNSWPL       | 35-43                   | RKEINNMLLVKAYFD | 163-177   |         |                        |                        |                 |           |
|                 |                         | KEINNMLLVKAYFDI | 164-178   |         |                        |                        |                 |           |
| 7               | Mbov_0274 <sup>a</sup>  | AFM51642_1      | LNFLRSAYV | 517-525 | KKVVFOFAQNSWPL         | 29-43                  |                 |           |
|                 |                         |                 |           |         | IPLAVAAPM              | 11-19                  | KVVFOFAQNSWPLP  | 30-44     |
|                 |                         |                 |           |         |                        |                        | VVFOFAQNSWPLPK  | 31-45     |
|                 |                         |                 |           |         | GYIMPLASV              | 476-484                | FOFAQNSWPLPKML  | 33-47     |
|                 |                         |                 |           |         |                        |                        | VFOFAQNSWPLPKM  | 32-46     |
|                 |                         |                 |           |         |                        |                        | LNFLRSAYVSIKSIR | 517-531   |
|                 |                         |                 |           |         |                        |                        | IPLAVAAPMIAASC  | 10-24     |
|                 |                         |                 |           |         |                        |                        | GIPLAVAAPMIAAS  | 9-23      |
|                 |                         |                 |           |         |                        |                        | IPLAVAAPMIAASCQ | 11-25     |
|                 |                         |                 |           |         | 8                      | Mbov_0290 <sup>b</sup> | AFM51658_1      | GYIMPLASV |
| AKYSGYIMPLASVVN | 472-486                 |                 |           |         |                        |                        |                 |           |
| FAKYSYIMPLASVV  | 471-485                 |                 |           |         |                        |                        |                 |           |
| KYSYIMPLASVVND  | 473-487                 |                 |           |         |                        |                        |                 |           |
|                 |                         |                 |           |         | YSGYIMPLASVVNDE        | 474-488                |                 |           |
|                 |                         |                 |           |         | <u>SGYIMPLASVVNDES</u> | 475-489                |                 |           |

|    |                          |            |           |         |                        |         |
|----|--------------------------|------------|-----------|---------|------------------------|---------|
|    |                          |            |           |         | <u>IPYVSVKQALSALEG</u> | 69-83   |
|    |                          |            |           |         | <u>PYVSVKQALSALEGV</u> | 70-84   |
|    |                          |            |           |         | <u>RIPYVSVKQALSALE</u> | 68-82   |
|    |                          |            |           |         | <u>KNYQIYHANGASLK</u>  | 102-116 |
|    |                          |            | PYVSVKQAL | 70-78   | <u>NKNYQIYHANGASLK</u> | 101-115 |
|    |                          |            |           |         | <u>NYQIYHANGASLKFN</u> | 103-117 |
|    |                          |            |           |         | <u>YQIYHANGASLKFNW</u> | 104-118 |
|    |                          |            | IYHANGASL | 106-114 | <u>LLTSNLSFSAANALV</u> | 520-534 |
| 9  | Mbov_0296 <sup>b</sup>   | AFM51664_1 |           |         | <u>FLLTSNLSFSAANAL</u> | 519-533 |
|    |                          |            |           |         | <u>LTSNLSFSAANALVA</u> | 521-535 |
|    |                          |            |           |         | <u>TSNLSFSAANALVAY</u> | 522-536 |
|    |                          |            | LSFSAANAL | 525-533 | <u>SNLSFSAANALVAYT</u> | 523-537 |
|    |                          |            | FSAANALVA | 527-535 | <u>NLSFSAANALVAYTA</u> | 524-538 |
|    |                          |            |           |         | <u>LSFSAANALVAYTAA</u> | 525-539 |
|    |                          |            |           |         | <u>LSFSAANALVAYTAA</u> | 525-539 |
|    |                          |            |           |         | <u>NLSFSAANALVAYTA</u> | 524-538 |
|    |                          |            |           |         | <u>SFSAANALVAYTAAD</u> | 526-540 |
|    |                          |            |           |         | <u>FSAANALVAYTAADK</u> | 527-541 |
| 10 | Mbov_0350 <sup>a,b</sup> | AFM51716_1 |           |         |                        |         |
| 11 | Mbov_0364 <sup>a,b</sup> | AFM51726_1 |           |         |                        |         |
| 12 | Mbov_0374 <sup>b</sup>   | AFM51736_1 |           |         |                        |         |
|    |                          |            |           |         | <u>SKYLQTVDYVSAFKT</u> | 343-357 |
|    |                          |            |           |         | <u>FSSLYYGASGSLAYN</u> | 471-485 |
| 13 | Mbov_0468 <sup>a,b</sup> | AFM51824_1 | KYLQTVDYV | 344-352 | <u>NFSSLYYGASGSLAY</u> | 470-484 |
|    |                          |            | LYYGASGSL | 474-482 | <u>SSLYYGASGSLAYNE</u> | 472-486 |
|    |                          |            |           |         | <u>SLYYGASGSLAYNEY</u> | 473-487 |
|    |                          |            |           |         | <u>LYYGASGSLAYNEYG</u> | 474-488 |

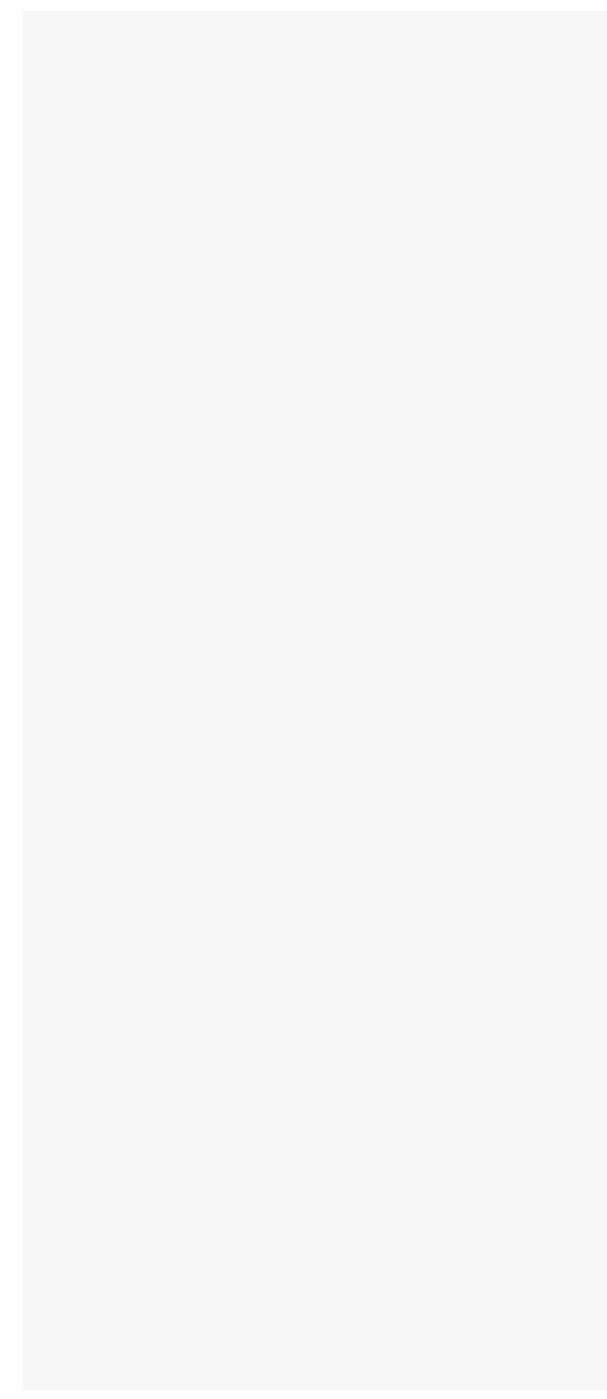

|    |                         |            |           |         |                         |         |
|----|-------------------------|------------|-----------|---------|-------------------------|---------|
|    |                         |            | PYAFSAGNI | 446-454 | <u>YVLTSPYAFSAGNIF</u>  | 441-455 |
|    |                         |            |           |         | <u>LTSPYAFSAGNIFPO</u>  | 443-457 |
|    |                         |            | IGYKTFGGA | 468-476 | <u>IGYKTFGGASAIYA</u>   | 468-482 |
| 14 | Mbov_0471 <sup>ab</sup> | AFM51827_1 |           |         | <u>VIGYKTFGGASAIY</u>   | 467-481 |
|    |                         |            |           |         | <u>KVIGYKTFGGASAI</u>   | 466-480 |
|    |                         |            |           |         | <u>GKVIGYKTFGGASAI</u>  | 465-479 |
|    |                         |            | ASAIYAIL  | 476-484 | <u>YKTFGGASAIYAIL</u>   | 470-484 |
|    |                         |            | DESALKEFL | 33-41   | <u>FDESALKEFLIPLA</u>   | 32-46   |
|    |                         |            |           |         | <u>IAKSFKISLPKPSNS</u>  | 97-111  |
| 15 | Mbov_0505 <sup>ab</sup> | AFM51861_1 | IAKSFKISL | 97-105  | <u>PIAKSFKISLPKPSN</u>  | 96-110  |
|    |                         |            |           |         | <u>PPIAKSFKISLPKPS</u>  | 95-109  |
|    |                         |            |           |         | <u>DNYN SIDVPLAVDEK</u> | 597-611 |
|    |                         |            |           |         | <u>LDNYN SIDVPLAVDE</u> | 596-610 |
|    |                         |            | NYNSIDVPL | 598-606 | <u>NYNSIDVPLAVDEKI</u>  | 598-612 |
|    |                         |            |           |         | <u>YLDNYN SIDVPLAVD</u> | 595-609 |
| 16 | Mbov_0515 <sup>ab</sup> | AFM51869_1 |           |         | <u>NFTKFSFSKPSGIIK</u>  | 489-503 |
|    |                         |            |           |         | <u>PNFTKFSFSKPSGII</u>  | 488-502 |
|    |                         |            | FSFSKPSGI | 493-501 | <u>DPNFTKFSFSKPSGI</u>  | 487-501 |
|    |                         |            |           |         | <u>FTKFSFSKPSGIIKT</u>  | 490-504 |
|    |                         |            |           |         | <u>TKFSFSKPSGIIKT</u>   | 491-505 |
|    |                         |            | KYYQYSDAL | 704-712 | <u>LNKYYQYSDALKAGG</u>  | 702-716 |
|    |                         |            |           |         | <u>NLNKYYQYSDALKAG</u>  | 701-715 |
|    |                         |            |           |         | <u>DNLNKYYQYSDALKA</u>  | 700-714 |
|    |                         |            |           |         | <u>NKYYQYSDALKAGGK</u>  | 703-717 |
|    |                         |            |           |         | <u>KYYQYSDALKAGGKK</u>  | 704-718 |
| 17 | Mbov_0516 <sup>ab</sup> | AFM51870_1 | SQYPPNTPI | 533-541 | <u>VSSQYPPNTPIATRI</u>  | 531-545 |
|    |                         |            |           |         | <u>YNVSSQYPPNTPIAT</u>  | 529-543 |
|    |                         |            |           |         | <u>NVSSQYPPNTPIATR</u>  | 530-544 |
|    |                         |            |           |         | <u>SSQYPPNTPIATRIS</u>  | 532-546 |
|    |                         |            | TPIATRISF | 539-547 | <u>SQYPPNTPIATRISF</u>  | 533-547 |
| 18 | Mbov_0517 <sup>ab</sup> | AFM51871_1 | TEELRKKTV | 178-186 | <u>TEELRKKTVEKALTS</u>  | 178-192 |
|    |                         |            |           |         | <u>VTEELRKKTVEKALT</u>  | 177-191 |
| 19 | Mbov_0518 <sup>b</sup>  | AFM51872_1 | MYMAMLNKI | 192-200 | <u>NPMYMAMLNKILSQB</u>  | 190-204 |

|    |                         |            |           |         |                        |         |
|----|-------------------------|------------|-----------|---------|------------------------|---------|
| 20 | Mbov_0519 <sup>ab</sup> | AFM51873_1 | VSRDFRPNT | 520-528 | <u>NVSRDFRPNTSIPTR</u> | 519-533 |
|    |                         |            |           |         | <u>VSRDFRPNTSIPTRI</u> | 520-534 |
|    |                         |            |           |         | <u>YNVSRDFRPNTSIPT</u> | 518-532 |
| 21 | Mbov_0536 <sup>ab</sup> | AFM51890_1 | FDSNKAIKI | 226-234 | <u>LIFDSNKAIKILKYI</u> | 224-238 |
| 22 | Mbov_0570 <sup>ab</sup> | AFM51924_1 | IGFSALIPV | 15-23   | <u>IGFSALIPVLSARC</u>  | 15-29   |
|    |                         |            |           |         | <u>AIGFSALIPVLSARC</u> | 14-28   |
|    |                         |            | TAIPLLAAV | 14-22   | <u>LSSTAIPLLAAVSAK</u> | 11-25   |
|    |                         |            |           |         | <u>MIGLSSTAIPLLAAV</u> | 8-22    |
|    |                         |            |           |         | <u>STAIPLLAAVSAKCG</u> | 13-27   |
|    |                         |            |           |         | <u>GLSSTAIPLLAAVSA</u> | 10-24   |
|    |                         |            |           |         | <u>IGLSSTAIPLLAAVS</u> | 9-23    |
| 23 | Mbov_0579 <sup>ab</sup> | AFM51933_1 | NYGLASRL  | 111-119 | <u>NYGLASRLASSEMR</u>  | 111-125 |
|    |                         |            |           |         | <u>FNYGLASRLASSEM</u>  | 110-124 |
|    |                         |            |           |         | <u>AFNYGLASRLASSE</u>  | 109-123 |
|    |                         |            |           |         | <u>LAFNYGLASRLASS</u>  | 108-122 |
|    |                         |            | FMIPMLKSI | 170-178 | <u>FMIPMLKSIQVMSAN</u> | 170-184 |
|    |                         |            |           |         | <u>TFMIPMLKSIQVMSA</u> | 169-183 |
|    |                         |            |           |         | <u>SVYNSFESNKASAFE</u> | 155-169 |
| 24 | Mbov_0580 <sup>ab</sup> | AFM51934_1 | FESNKASAF | 160-168 | <u>NSVYNSFESNKASAF</u> | 154-168 |
|    |                         |            |           |         | <u>VYNSFESNKASAFEF</u> | 156-170 |
|    |                         |            | YEYGYLLAL | 227-235 | <u>YEGYLLALPPINFL</u>  | 227-241 |
|    |                         |            | NNYEYGYLL | 225-233 | <u>EYGYLLALPPINFLR</u> | 228-242 |
|    |                         |            | GYLLALPPI | 230-238 | <u>NYEYGYLLALPPINF</u> | 226-240 |
|    |                         |            | KNNYEYGYL | 224-232 | <u>NNYEYGYLLALPPIN</u> | 225-239 |
|    |                         |            |           |         | <u>YGYLLALPPINFLRN</u> | 229-243 |
| 25 | Mbov_0585 <sup>ab</sup> | AFM51939_1 |           |         | <u>GYLLALPPINFLRNY</u> | 230-244 |
|    |                         |            |           |         | <u>KNNYEYGYLLALPPI</u> | 224-238 |
|    |                         |            |           |         | <u>TMKNYGTTSIQIVKL</u> | 313-327 |
|    |                         |            |           |         | <u>NKNNYEYGYLLALPP</u> | 223-237 |
|    |                         |            |           |         | <u>KNYGTTSIQIVKLIQ</u> | 315-329 |
|    |                         |            | NYGTTSIQI | 316-324 | <u>NYGTTSIQIVKLIQD</u> | 316-330 |
|    |                         |            |           |         | <u>MKNYGTTSIQIVKLI</u> | 314-328 |

|    |                         |            |                                      |                         |                         |         |
|----|-------------------------|------------|--------------------------------------|-------------------------|-------------------------|---------|
| 26 | Mbov_0658 <sup>ab</sup> | AFM52009_1 | NYFVLTAPV                            | 438-446                 | DFNYFVLTAPVSFSA         | 436-450 |
|    |                         |            |                                      |                         | FNYFVLTAPVSFSAAG        | 437-451 |
|    |                         |            |                                      |                         | YDFNYFVLTAPVSFS         | 435-449 |
|    |                         |            |                                      |                         | FKWYIYTYAGLVISSS        | 16-30   |
| 27 | Mbov_0674 <sup>ab</sup> | AFM52024_1 | WYIYTYAGLV<br>IYTYAGLVI<br>KWIYTYAGL | 18-26<br>19-27<br>17025 | KFKWYIYTYAGLVISS        | 15-29   |
|    |                         |            |                                      |                         | KKFKWYIYTYAGLVIS        | 14-28   |
|    |                         |            |                                      |                         | <u>KWIYTYAGLVISSSS</u>  | 17-31   |
|    |                         |            |                                      |                         | <u>WYIYTYAGLVISSSSL</u> | 18-32   |
|    |                         |            |                                      |                         | <u>KAYFKTQAL</u> ASVIFN | 107-121 |
|    |                         |            |                                      |                         | KELSFEGAGSSELNE         | 262-276 |
|    |                         |            |                                      |                         | NKELSFEGAGSSELN         | 261-275 |
| 28 | Mbov_0675 <sup>ab</sup> | AFM52025_1 | KAYFKTQAL<br>FEGAGSSEL               | 107-115<br>266-274      | ELSFEGAGSSELNEA         | 263-277 |
|    |                         |            |                                      |                         | LSFEGAGSSELNEAH         | 264-278 |
|    |                         |            |                                      |                         | SNKELSFEGAGSSEL         | 260-274 |
|    |                         |            |                                      |                         | LGLGAI\$AFAAIPMV        | 7-21    |
|    |                         |            |                                      |                         | GAISAF\$AFAAIPMVAAT     | 10-24   |
|    |                         |            |                                      |                         | LGAI\$AFAAIPMVAA        | 9-23    |
|    |                         |            |                                      |                         | AI\$AFAAIPMVAATC        | 11-25   |
|    |                         |            |                                      |                         | GAISAF\$AFAAIPMVAAT     | 10-24   |
|    |                         |            |                                      |                         | LGAI\$AFAAIPMVAA        | 9-23    |
|    |                         |            |                                      |                         | AI\$AFAAIPMVAATC        | 11-25   |
| 28 | Mbov_0675 <sup>ab</sup> | AFM52025_1 | AYAQYSHNV                            | 555-563                 | ISAF\$AFAAIPMVAATCG     | 12-26   |
|    |                         |            |                                      |                         | GLGAI\$AFAAIPMVA        | 8-22    |
|    |                         |            |                                      |                         | SAFAAIPMVAATCGV         | 13-27   |
|    |                         |            |                                      |                         | KVFSGAYAQYSHNV\$        | 550-564 |
|    |                         |            |                                      |                         | SKVFSGAYAQYSHNV         | 549-563 |
|    |                         |            |                                      |                         | <u>KFILGLGAI\$AFAAI</u> | 4-18    |
| 28 | Mbov_0675 <sup>ab</sup> | AFM52025_1 | KFILGLGAI                            | 4-12                    | <u>RKFILGLGAI\$AFAA</u> | 3-17    |

|    |                          |            |           |         |                        |         |
|----|--------------------------|------------|-----------|---------|------------------------|---------|
|    |                          |            | SAISFAASV | 384-392 | <u>QIFRFQSAISFAASV</u> | 378-392 |
|    |                          |            | QIFRFQSAI | 378-386 | <u>IFRFQSAISFAASVG</u> | 379-393 |
|    |                          |            |           |         | <u>FRFQSAISFAASVGA</u> | 380-394 |
|    |                          |            |           |         | <u>IFRFQSAISFAASVG</u> | 379-393 |
|    |                          |            |           |         | <u>QIFRFQSAISFAASV</u> | 378-392 |
|    |                          |            |           |         | <u>FRFQSAISFAASVGA</u> | 380-394 |
|    |                          |            |           |         | <u>QSAISFAASVGAYQN</u> | 383-397 |
|    |                          |            |           |         | <u>SAISFAASVGAYQNK</u> | 384-398 |
|    |                          |            |           |         | <u>WQIFRFQSAISFAAS</u> | 377-391 |
|    |                          |            |           |         | <u>SWQIFRFQSAISFAA</u> | 376-390 |
| 29 | Mbov_0739 <sup>a,b</sup> | AFM52087_1 | GEYQLLKKV | 95-103  | <u>YGEYQLLKKVAHAIE</u> | 94-108  |
|    |                          |            |           |         | <u>EYGEYQLLKKVAHAI</u> | 93-107  |
|    |                          |            | LNMLRSAQL | 544-552 | <u>LNMLRSAQLSLESL</u>  | 544-558 |
|    |                          |            |           |         | <u>KLNMLRSAQLSLESL</u> | 543-557 |
|    |                          |            | GYIMPLASV | 497-505 | <u>ARTSGYIMPLASVVT</u> | 493-507 |
|    |                          |            |           |         | <u>RTSGYIMPLASVVTE</u> | 494-508 |
|    |                          |            |           |         | <u>IARTSGYIMPLASVV</u> | 492-506 |
|    |                          |            |           |         | <u>TSGYIMPLASVVTEA</u> | 495-509 |
|    |                          |            |           |         | <u>SGYIMPLASVVTEAT</u> | 496-510 |
|    |                          |            | LPAAAGLSV | 13-21   | <u>KAGAILLPAAAGLSV</u> | 7-21    |
|    |                          |            |           |         | <u>GVNFLPYNSSAIINK</u> | 269-283 |
| 30 | Mbov_0743 <sup>a,b</sup> | AFM52091_1 | VNFLPYNSS | 270-278 | <u>DGVNFLPYNSSAIIN</u> | 268-282 |
|    |                          |            | LPYNSSAI  | 273-281 | <u>VNFLPYNSSAIINKF</u> | 270-284 |
|    |                          |            |           |         | <u>HDGVNFLPYNSSAI</u>  | 267-281 |
|    |                          |            |           |         | <u>KIEAAIKEAIVAKVP</u> | 154-168 |
| 31 | Mbov_0798 <sup>a,b</sup> | AFM52146_1 | IEAAIKEAI | 155-163 | <u>EKIEAAIKEAIVAKV</u> | 153-167 |
|    |                          |            | IEAAIKEAI | 69-77   | <u>KIEAAIKEAIVTKVP</u> | 68-82   |
|    |                          |            |           |         | <u>IEAAIKEAIVAKVPT</u> | 155-169 |

a: related to *M. bovis* HB0801-P1, b: related to P150 and a,b: related to both (*M. bovis* HB0801-P1, and P150).



**Table S8** The 3D structure templates used for recognition of conformational B cell epitopes at minimum cut-off 0.8 for *M. bovis* secreted proteins

| No | Proteins                |              | PDB ID | Seq Identity/Percentage | Epitope | Residue                                                                                                                                        | No | Score | 3D Structure                                                                         |
|----|-------------------------|--------------|--------|-------------------------|---------|------------------------------------------------------------------------------------------------------------------------------------------------|----|-------|--------------------------------------------------------------------------------------|
|    | Mnemonic                | Accession No |        |                         |         |                                                                                                                                                |    |       |                                                                                      |
|    |                         |              |        |                         | 1       | A:Q102, A:V103, A:S104, A:G105, A:N106, A:K107, A:N108, A:L109, A:R110, A:N111                                                                 | 10 | 0.892 | 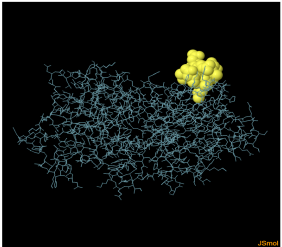  |
| 1  | Mbov_0016 <sup>ab</sup> | AFM51394_1   | 2fqx   | 20.61                   | 2       | A:N162, A:S359, A:Q360, A:G361, A:E362, A:N363, A:S364, A:L365, A:S366, A:L367, A:Q368, A:P369, A:G370                                         | 13 | 0.866 |   |
|    |                         |              |        |                         | 3       | A:S218, A:Y221, A:K222, A:D223, A:N224, A:P225, A:E226, A:K227, A:E258, A:H259, A:P260, A:E261, A:A262, A:K263, A:T264, A:K265, A:S266, A:L267 | 18 | 0.862 |  |

Formatted Table



3 Mbov\_0049<sup>a,b</sup> AFM51424\_1 1c1g 21.85

2 A:T587, A:K589, A:N590 3 0.862

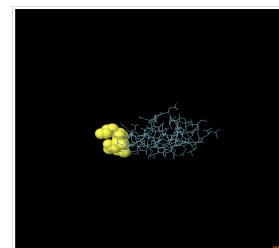

1 A:Y706, A:L709, A:E710 3 0.967

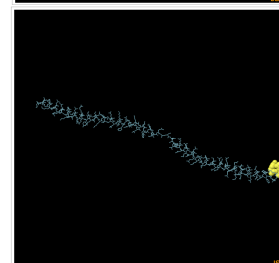

2 A:L700, A:S703, A:F704,  
A:E707, A:D708 5 0.95

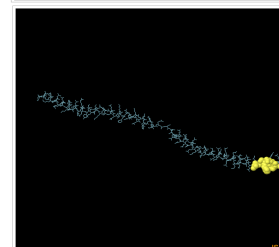

|   |                          |            |      |       |                                                                                                                                                                                                             |                                                                                                                    |       |       |
|---|--------------------------|------------|------|-------|-------------------------------------------------------------------------------------------------------------------------------------------------------------------------------------------------------------|--------------------------------------------------------------------------------------------------------------------|-------|-------|
|   |                          |            |      | 1     | A:R517, A:D518, A:Y519                                                                                                                                                                                      | 3                                                                                                                  | 0.866 |       |
| 4 | Mbov_01111 <sup>ab</sup> | AFM51486_1 | 3ryb | 16.11 | 2                                                                                                                                                                                                           | A:G426, A:R427, A:N445,<br>A:P446, A:H447, A:Y448,<br>A:R449, A:K450, A:W460,<br>A:K461, A:E462, A:S463,<br>A:R464 | 13    | 0.841 |
|   |                          |            |      | 3     | A:A563, A:F564, A:G565,<br>A:A566, A:S567, A:L568,<br>A:K569, A:E570, A:I571,<br>A:R572, A:E573, A:G574,<br>A:G575, A:K576, A:P577,<br>A:T578, A:N579, A:L580,<br>A:K581, A:D582, A:K583,<br>A:L584, A:T587 | 23                                                                                                                 | 0.838 |       |

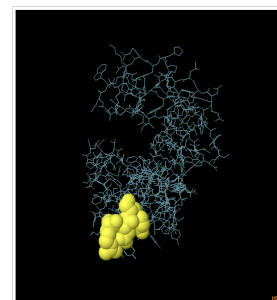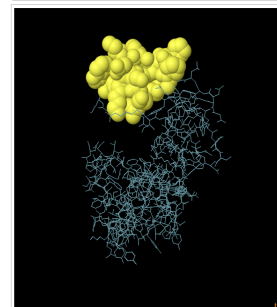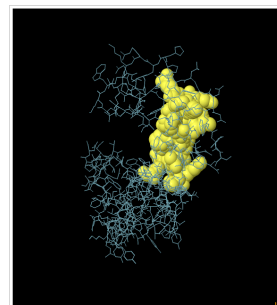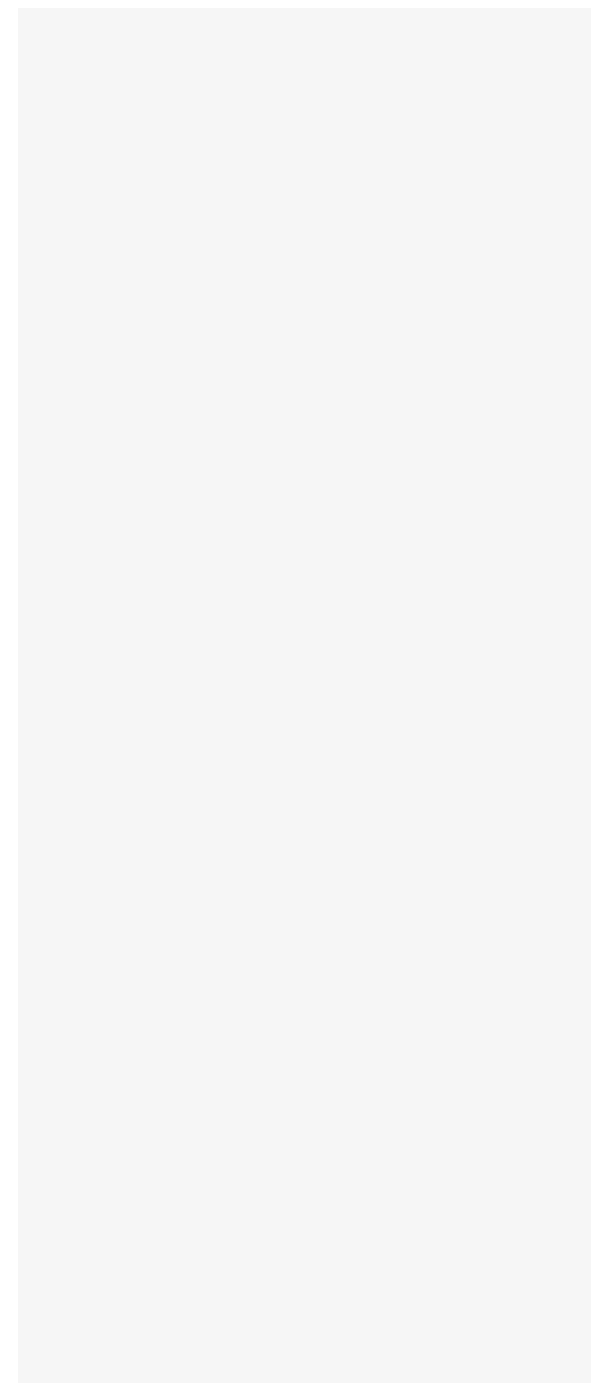

|   |                          |            |       |   |                                           |   |       |  |  |  |
|---|--------------------------|------------|-------|---|-------------------------------------------|---|-------|--|--|--|
|   |                          | AFM51586_1 |       |   |                                           |   |       |  |  |  |
| 5 | Mbov_0217 <sup>a,b</sup> | 2l69       | 22.45 | 1 | A:L409, A:N410, A:K411,<br>A:A413, A:Y414 | 5 | 0.841 |  |  |  |

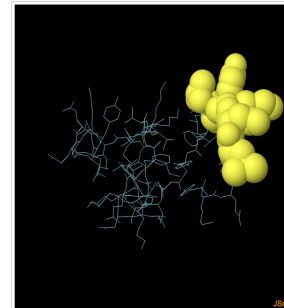

|  |  |  |  |   |                                                              |   |       |  |  |  |
|--|--|--|--|---|--------------------------------------------------------------|---|-------|--|--|--|
|  |  |  |  |   |                                                              |   |       |  |  |  |
|  |  |  |  | 1 | A:N168, A:L169, A:E170,<br>A:V171, A:L172, A:D173,<br>A:Y174 | 7 | 0.963 |  |  |  |

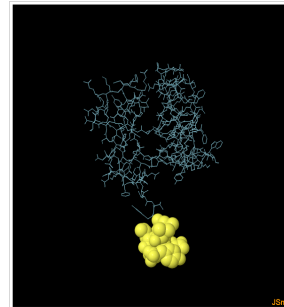

|   |                        |            |      |       |  |  |  |  |  |  |
|---|------------------------|------------|------|-------|--|--|--|--|--|--|
| 6 | Mbov_0274 <sup>a</sup> | AFM51642_1 | 4gqo | 20.00 |  |  |  |  |  |  |
|---|------------------------|------------|------|-------|--|--|--|--|--|--|

|  |  |  |  |   |                                   |   |       |  |  |  |
|--|--|--|--|---|-----------------------------------|---|-------|--|--|--|
|  |  |  |  | 2 | A:A164, A:V165, A:V166,<br>A:Y167 | 4 | 0.888 |  |  |  |
|--|--|--|--|---|-----------------------------------|---|-------|--|--|--|

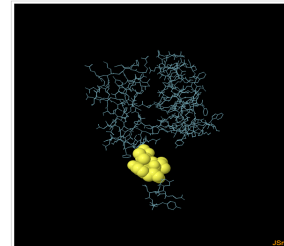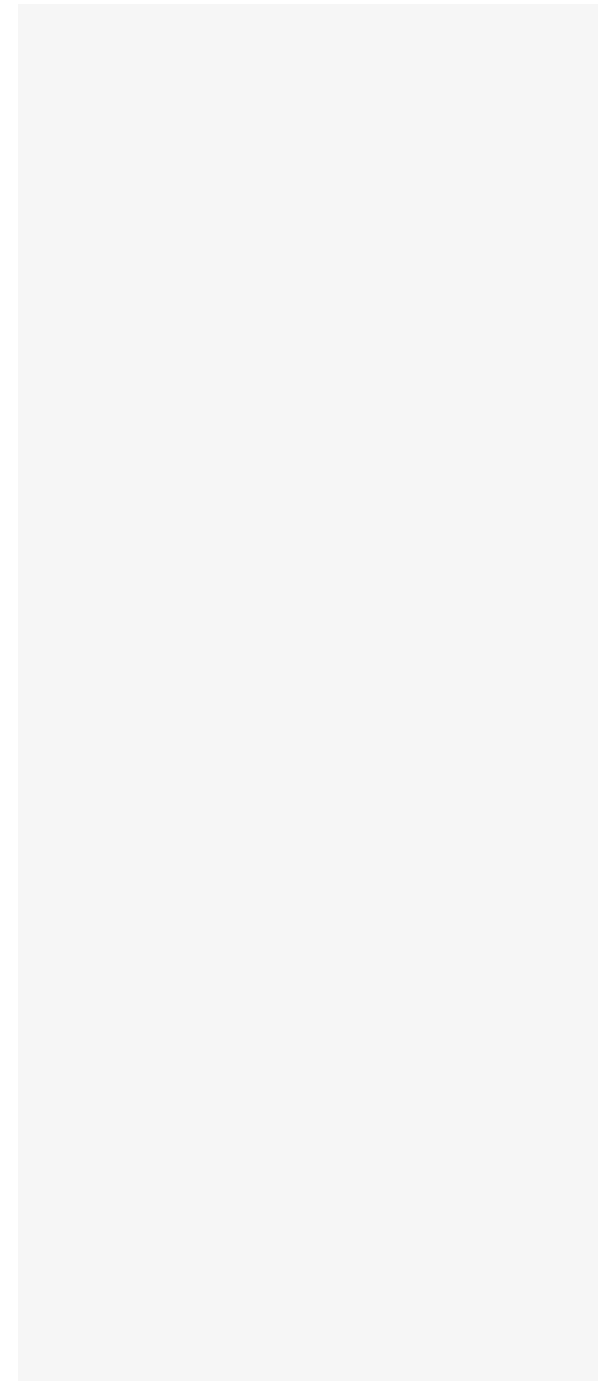

|   |                        |            |      |   |                                                                                                                    |    |       |                                                                                       |
|---|------------------------|------------|------|---|--------------------------------------------------------------------------------------------------------------------|----|-------|---------------------------------------------------------------------------------------|
|   |                        |            |      | 3 | A:Y53, A:T56, A:T57, A:F58,<br>A:S59, A:K60, A:H61                                                                 | 7  | 0.848 | 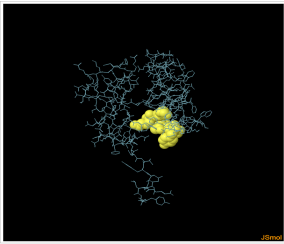   |
|   |                        |            |      | 4 | A:K62, A:D63, A:F64                                                                                                | 3  | 0.811 |    |
|   |                        |            |      | 1 | A:N401, A:K402, A:Q443,<br>A:R445, A:S446, A:M447,<br>A:E448, A:T449, A:G450,<br>A:K451, A:E452, A:I453,<br>A:N454 | 13 | 0.859 |   |
| 7 | Mbov_0296 <sup>b</sup> | AFM51664_1 | 4ghn |   |                                                                                                                    |    | 14.52 |                                                                                       |
|   |                        |            |      | 2 | A:Q241, A:D242, A:Q245,<br>A:F249, A:D273, A:P274,<br>A:S275, A:K277, A:K278                                       | 9  | 0.857 |  |



3 A:L281, A:N282, A:R283,  
A:D284, A:P285 5 0.852

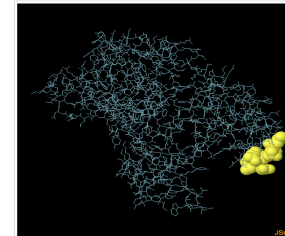

4 A:E235, A:T236, A:S237,  
A:A238, A:Q239, A:L568,  
A:S569, A:D570, A:G571,  
A:T572 10 0.815

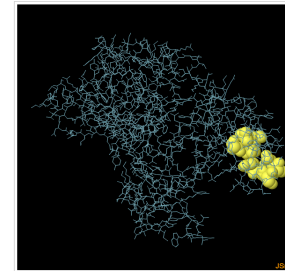

5 A:N322, A:Y323, A:I324,  
A:L327, A:V328, A:K329,  
A:H330, A:S331, A:L332,  
A:D333, A:E334, A:Y335,  
A:K336, A:N337, A:K338,  
A:V339, A:D340, A:P341,  
A:F343, A:N344, A:S345,  
A:K346, A:W347, A:L348,  
A:N349, A:A350, A:V378,  
A:S379, A:Q380, A:T381,  
A:I382, A:N383, A:G384,  
A:L385, A:R386, A:L387,  
A:V388 37 0.81

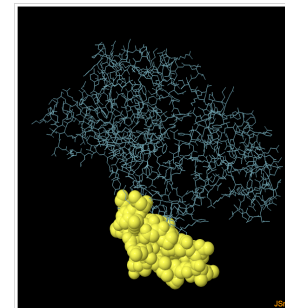

|   |                         |            |      |       |   |                                                                                                         |    |       |
|---|-------------------------|------------|------|-------|---|---------------------------------------------------------------------------------------------------------|----|-------|
|   |                         |            |      |       | 1 | C:K517, C:Y518, C:D519,<br>C:L520, C:S521, C:K522,<br>C:N523, C:P524, C:E525,<br>C:K526, C:L527, C:Y528 | 12 | 0.935 |
| 8 | Mbov_0471 <sup>ab</sup> | AFM51827_1 | 1k32 | 15.41 | 2 | A:I255, A:L257, A:D258,<br>A:N260, A:K261, A:K264                                                       | 6  | 0.894 |

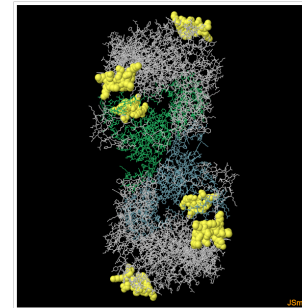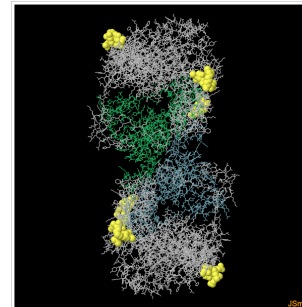

|  |  |  |  |  |   |                                                   |   |       |
|--|--|--|--|--|---|---------------------------------------------------|---|-------|
|  |  |  |  |  | 3 | B:I255, B:L257, B:D258, B:N260,<br>B:K261, B:K264 | 6 | 0.894 |
|--|--|--|--|--|---|---------------------------------------------------|---|-------|

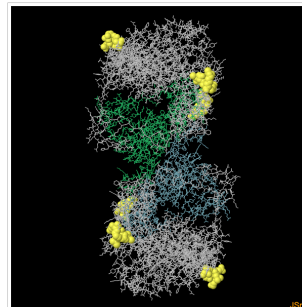



4 F:I255, F:L257, F:D258, F:N260,  
F:K261 5 0.887

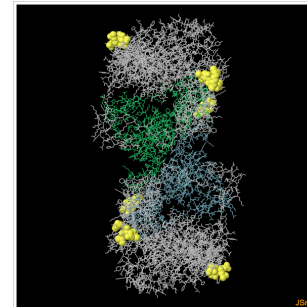

5 C:I255, C:L257, C:D258,  
C:N260, C:K261, C:S262,  
C:E265, C:F266 8 0.881

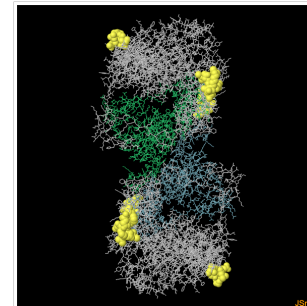

6 F:Y348, F:T349, F:P350, F:D351,  
F:N352, F:K353, F:K383, F:P446,  
F:G465, F:K466, F:G469, F:Y470,  
F:K471, F:T499, F:D500, F:K501,  
F:R504, F:F508, F:G509, F:I510,  
F:E511, F:P512, F:N513, F:F514,  
F:K515, F:F516, F:K517, F:Y518,  
F:D519, F:L520, F:S521, F:K522,  
F:N523, F:P524, F:E525, F:L527,  
F:Y528, F:D529, F:L530, F:T531,  
F:Q534, F:N535, F:V537,  
F:N538, F:N539, F:I540, F:S541,  
F:Q542 48 0.876

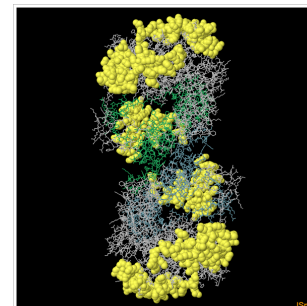

7 D:Y348, D:T349, D:P350,  
 D:D351, D:N352, D:K353,  
 D:T354, D:K383, D:P446,  
 D:K466, D:G469, D:Y470,  
 D:K471, D:T472, D:G509,  
 D:I510, D:E511, D:P512,  
 D:N513, D:F514, D:K515,  
 D:F516, D:K517, D:Y518,  
 D:D519, D:L520, D:S521,  
 D:K522, D:N523, D:P524,  
 D:E525, D:K526, D:Y528,  
 D:D529, D:L530, D:T531,  
 D:Q534, D:N535, D:V537,  
 D:N538, D:N539, D:I540,  
 D:S541, D:Q542

44 0.873

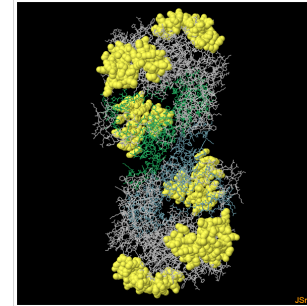

8 E:I255, E:L257, E:D258, E:N260,  
 E:K261, E:S262, E:E265, E:F266,  
 E:D292

9 0.87

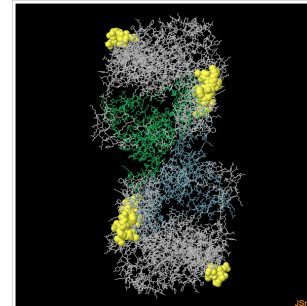

|    |                                                                                                                                                                                                                                                                                                                                                                                                                                                   |    |       |
|----|---------------------------------------------------------------------------------------------------------------------------------------------------------------------------------------------------------------------------------------------------------------------------------------------------------------------------------------------------------------------------------------------------------------------------------------------------|----|-------|
| 9  | <p>E:Y348, E:T349, E:P350, E:D351,<br/> E:N352, E:K353, E:T354,<br/> E:K383, E:P446, E:G465,<br/> E:K466, E:G469, E:Y470,<br/> E:K471, E:T472, E:G509, E:I510,<br/> E:E511, E:P512, E:N513, E:F514,<br/> E:K515, E:F516, E:K517, E:Y518,<br/> E:D519, E:L520, E:S521, E:K522,<br/> E:N523, E:P524, E:E525, E:L527,<br/> E:Y528, E:L530, E:T531, E:Q534,<br/> E:N535, E:V537, E:N538,<br/> E:N539, E:I540, E:S541, E:Q542</p>                      | 44 | 0.867 |
| 10 | <p>B:Y348, B:T349, B:P350, B:D351,<br/> B:N352, B:K353, B:V382,<br/> B:K383, B:F438, B:P446, B:G465,<br/> B:K466, B:G469, B:Y470,<br/> B:K471, B:T472, B:F508, B:G509,<br/> B:I510, B:E511, B:P512, B:N513,<br/> B:F514, B:K515, B:F516, B:K517,<br/> B:Y518, B:D519, B:L520, B:S521,<br/> B:K522, B:N523, B:P524,<br/> B:E525, B:K526, B:D529,<br/> B:L530, B:T531, B:Q534,<br/> B:N535, B:V537, B:N538,<br/> B:N539, B:I540, B:S541, B:Q542</p> | 46 | 0.864 |

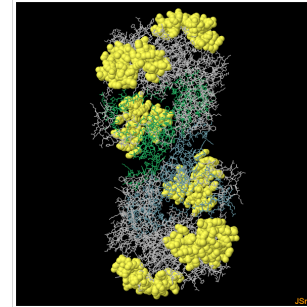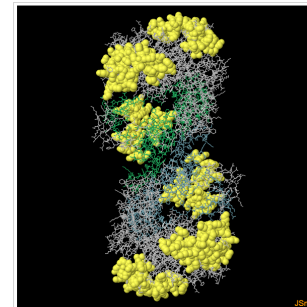

11 A:Y348, A:T349, A:P350,  
A:D351, A:N352, A:K353,  
A:T354, A:V382, A:K383,  
A:F438, A:P446, A:G465,  
A:K466, A:G469, A:Y470,  
A:K471, A:T472, A:G509,  
A:I510, A:E511, A:P512,  
A:N513, A:F514, A:K515,  
A:F516, A:K517, A:Y518,  
A:D519, A:L520, A:S521,  
A:K522, A:N523, A:P524,  
A:E525, A:K526, A:Y528,  
A:D529, A:L530, A:T531,  
A:Q534, A:N535, A:V537,  
A:N538, A:N539, A:I540,  
A:S541, A:Q542

47 0.861

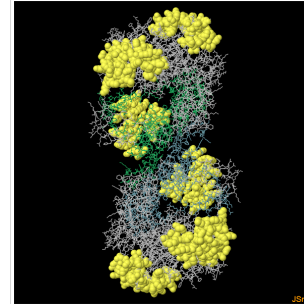

12 A:S262, A:E265, A:F266,  
A:D292

4 0.86

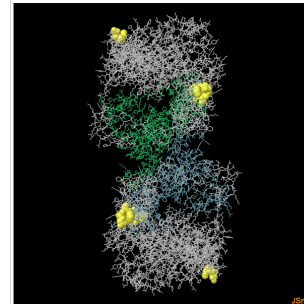

13 B:S262, B:E265, B:F266, B:D292 4 0.86

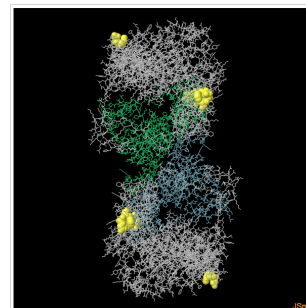

14 F:S262, F:E265, F:F266, F:D292 4 0.86

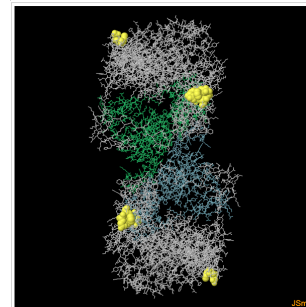

15 D:K261, D:S262, D:E265,  
D:F266, D:D292, D:L293 6 0.857

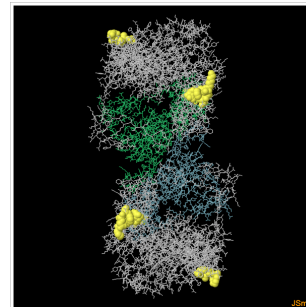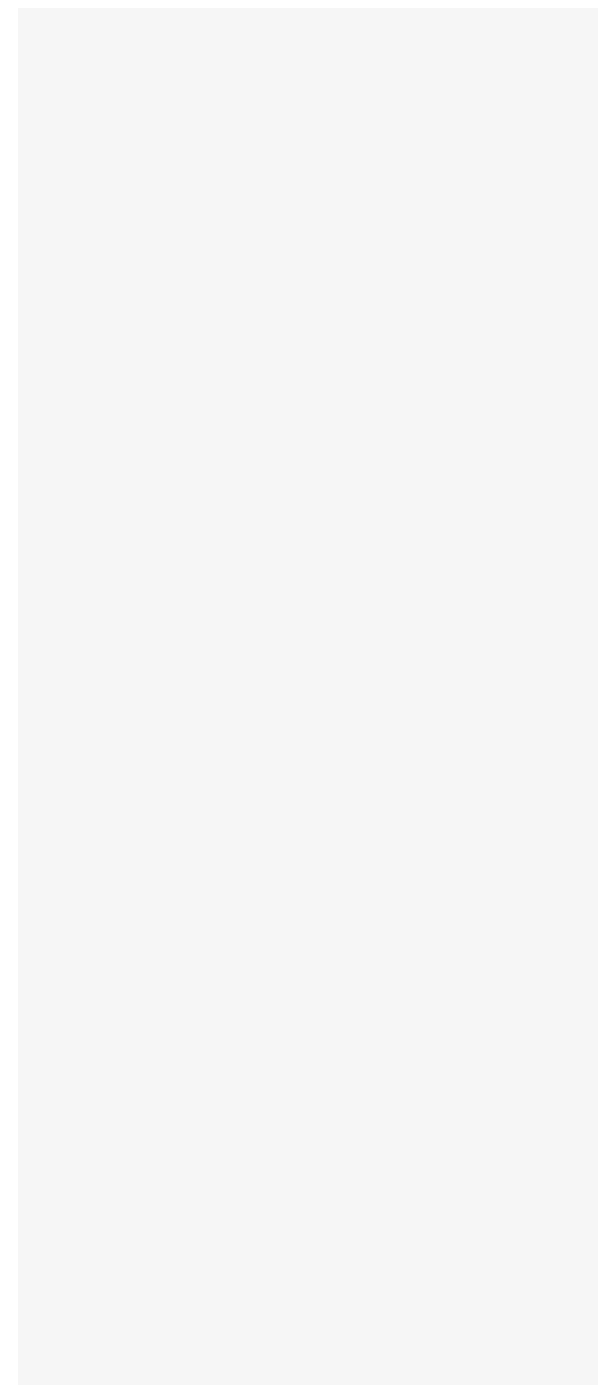

16 A:T499, A:D500, A:K501,  
A:H502, A:F503, A:R504 6 0.851

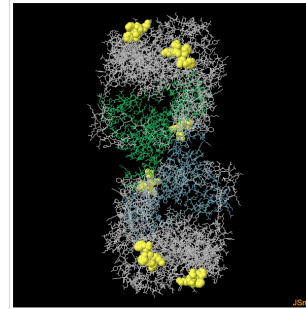

17 B:T499, B:D500, B:K501,  
B:H502, B:F503, B:R504 6 0.851

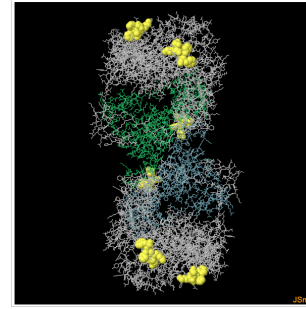

18 C:T499, C:D500, C:K501,  
C:H502, C:F503, C:R504 6 0.851

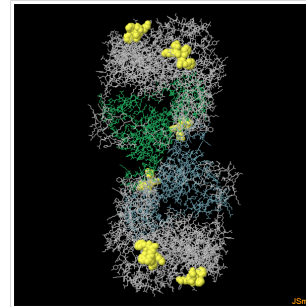

19 D:T499, D:D500, D:K501,  
D:H502, D:F503, D:R504 6 0.851

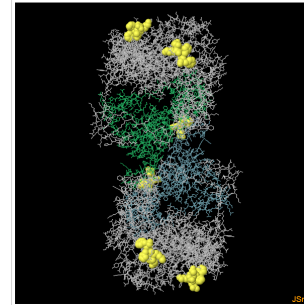

20 D:I255, D:L257, D:D258 3 0.849

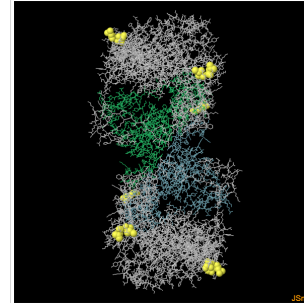

21 E:T499, E:D500, E:K501,  
E:H502, E:F503, E:R504 6 0.847

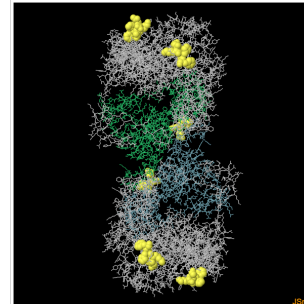

|  |  |  |  |  |    |                                                                                                                                                                                                                                                                                                                         |    |       |
|--|--|--|--|--|----|-------------------------------------------------------------------------------------------------------------------------------------------------------------------------------------------------------------------------------------------------------------------------------------------------------------------------|----|-------|
|  |  |  |  |  | 22 | C:Y348, C:T349, C:P350,<br>C:D351, C:N352, C:K353,<br>C:K383, C:F438, C:N462,<br>C:N463, C:V464, C:G465,<br>C:K466, C:G469, C:Y470,<br>C:K471, C:T472, C:G509,<br>C:I510, C:E511, C:P512,<br>C:N513, C:F514, C:K515,<br>C:F516, C:L530, C:T531,<br>C:Q534, C:N535, C:V537,<br>C:N538, C:N539, C:I540,<br>C:S541, C:Q542 | 35 | 0.846 |
|--|--|--|--|--|----|-------------------------------------------------------------------------------------------------------------------------------------------------------------------------------------------------------------------------------------------------------------------------------------------------------------------------|----|-------|

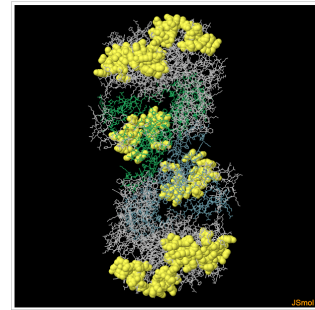

|   |                         |            |      |       |   |                        |   |       |
|---|-------------------------|------------|------|-------|---|------------------------|---|-------|
| 9 | Mbov_0515 <sup>ab</sup> | AFM51869_1 | 2mi7 | 30.77 | 1 | A:K398, A:K399, A:D400 | 3 | 0.803 |
|---|-------------------------|------------|------|-------|---|------------------------|---|-------|

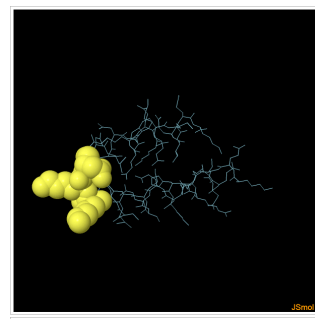

|    |                         |            |      |       |   |                                                   |   |       |
|----|-------------------------|------------|------|-------|---|---------------------------------------------------|---|-------|
| 10 | Mbov_0516 <sup>ab</sup> | AFM51870_1 | 1wpl | 20.41 | 1 | K:N743, K:G744, K:L745,<br>K:T746, K:F747, K:T748 | 6 | 0.803 |
|----|-------------------------|------------|------|-------|---|---------------------------------------------------|---|-------|

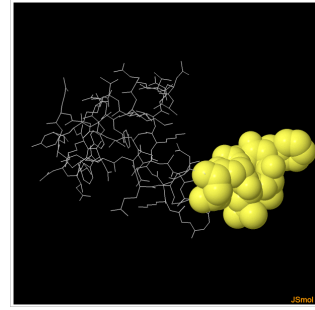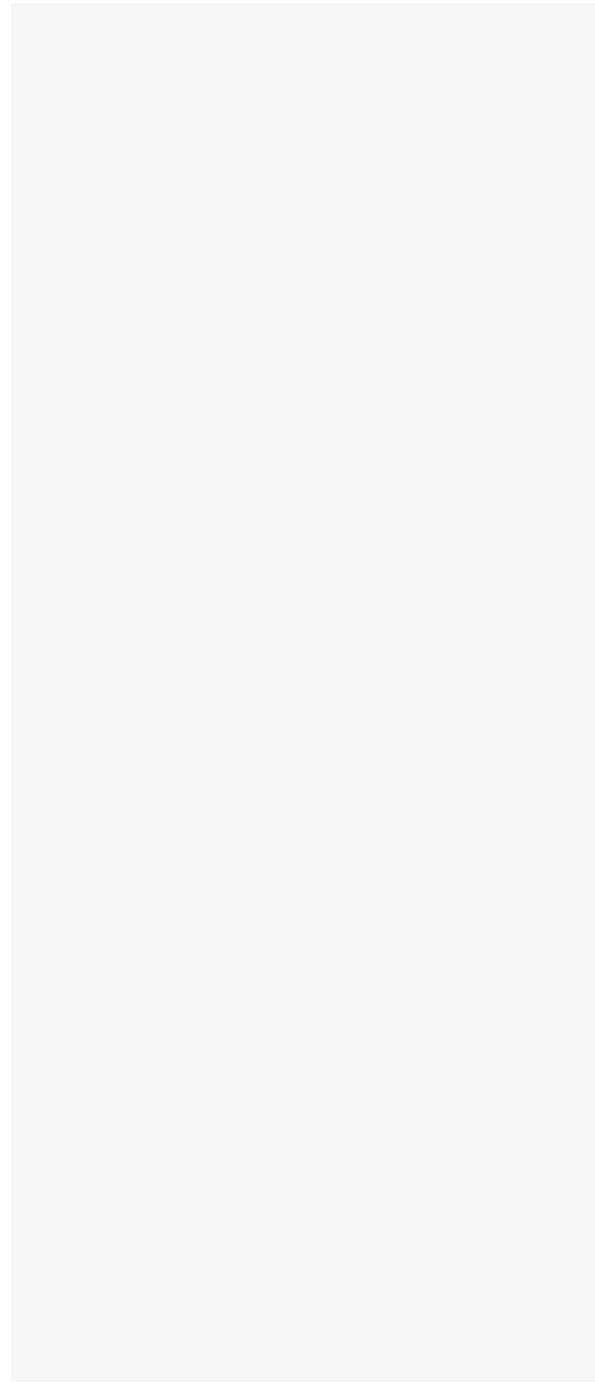



|    |                         |            |      |       |   |                                                                                                         |    |       |
|----|-------------------------|------------|------|-------|---|---------------------------------------------------------------------------------------------------------|----|-------|
|    |                         |            |      |       | 1 | C:D546, C:S547, C:D548,<br>C:D549, C:Y550, C:K551,<br>C:T552, C:E553, C:N554,<br>C:N555, C:F556, C:E557 | 12 | 0.916 |
| 11 | Mbov_0517 <sup>ab</sup> | AFM51871_1 | 4nzs | 19.70 | 2 | C:K636, C:A637, C:S638,<br>C:S639, C:F640, C:S641                                                       | 6  | 0.908 |

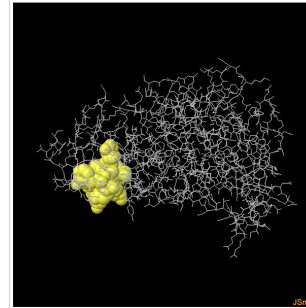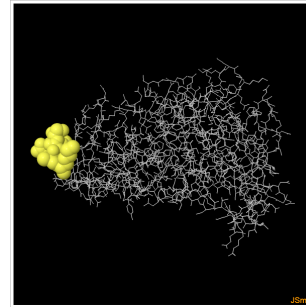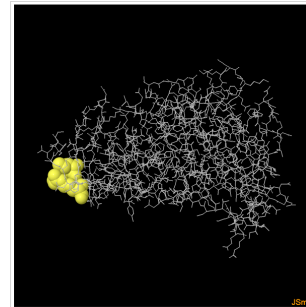

|  |  |  |  |  |   |                        |   |       |
|--|--|--|--|--|---|------------------------|---|-------|
|  |  |  |  |  | 3 | C:I607, C:K608, C:R611 | 3 | 0.874 |
|--|--|--|--|--|---|------------------------|---|-------|



4 C:R323, C:E324, C:F325,  
C:N326, C:T327, C:V328,  
C:T329, C:S330, C:R331,  
C:G343, C:S385

11 0.833

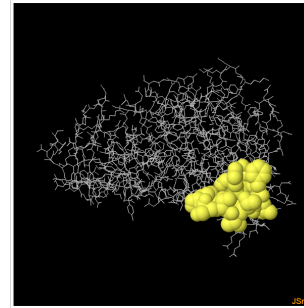

5 C:R413, C:N414, C:E416,  
C:G417, C:Y418, C:K419,  
C:T421, C:K422, C:E423,  
C:L424, C:I425, C:K427, C:F428

13 0.828

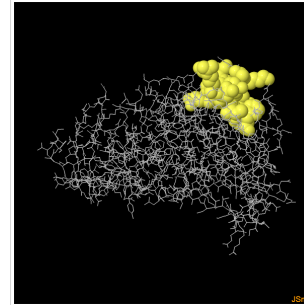

6 C:N380, C:N381, C:D382,  
C:G383, C:I384, C:H387,  
C:K394, C:I395, C:K396

9 0.822

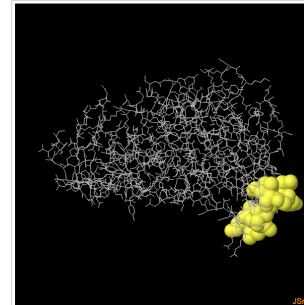

|    |                          |            |      |       |   |                                                                                                 |    |       |                                                                                      |
|----|--------------------------|------------|------|-------|---|-------------------------------------------------------------------------------------------------|----|-------|--------------------------------------------------------------------------------------|
|    |                          |            |      |       | 1 | A:I711, A:T716, A:G717,<br>A:S718, A:Y721                                                       | 5  | 0.853 | 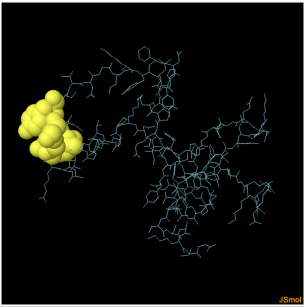  |
| 12 | Mbov_0518 <sup>b</sup>   | AFM51872_1 | 5jwg | 28.24 |   |                                                                                                 |    |       |                                                                                      |
|    |                          |            |      |       | 2 | A:E683, A:N684, A:L685                                                                          | 3  | 0.826 |   |
| 13 | Mbov_0519 <sup>a,b</sup> | AFM51873_1 | 4nzs | 18.28 | 1 | C:N322, C:T323, C:V324,<br>C:T325, C:S326, C:R327,<br>C:F338, C:K382, C:T384,<br>C:K385, C:R388 | 11 | 0.857 |  |



2 C:E600, C:G601, C:I602,  
C:K603, C:R606, C:L628,  
C:F629, C:N630, C:N631,  
C:S632, C:E633, C:A634,  
C:F635, C:E636

14 0.834

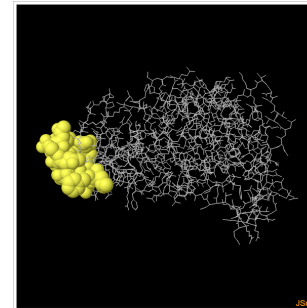

3 C:A540, C:D542, C:S543,  
C:D544, C:D545, C:F546,  
C:K547, C:N548, C:K549,  
C:S550, C:F551, C:E552,  
C:R598, C:V599

14 0.828

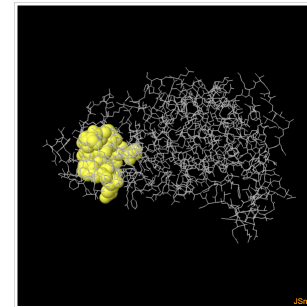

4 C:S377, C:A378, C:D379,  
C:G380, C:I381

5 0.813

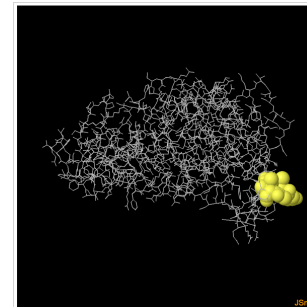

|    |                          |            |      |       |   |                                                                              |   |       |
|----|--------------------------|------------|------|-------|---|------------------------------------------------------------------------------|---|-------|
|    |                          |            |      |       | 5 | C:S412, C:G413, C:Y414,<br>C:D415, C:K416, C:T417,<br>C:L418, C:K419, C:D450 | 9 | 0.804 |
| 14 | Mbov_0570 <sup>a,b</sup> | AFM51924_1 | 1f3z | 23.96 | 1 | A:F492, A:Q493, A:P494,<br>A:V495                                            | 4 | 0.822 |
| 15 | Mbov_0579 <sup>a,b</sup> | AFM51933_1 | 4uac | 13.33 | 1 | A:Y699, A:L700, A:K701                                                       | 3 | 0.896 |

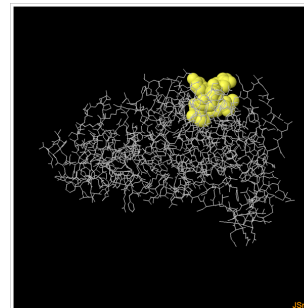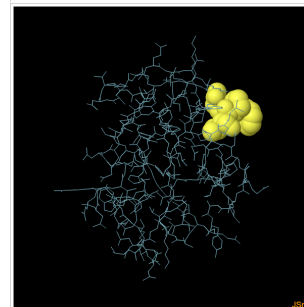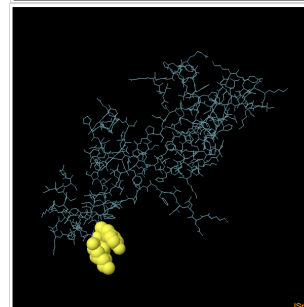

2 A:W558, A:S561, A:N562,  
A:E563 4 0.854

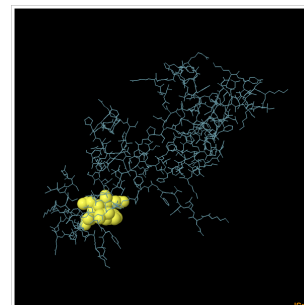

3 A:V577, A:S578, A:R579,  
A:G580, A:A581, A:K582,  
A:P583, A:D584 8 0.853

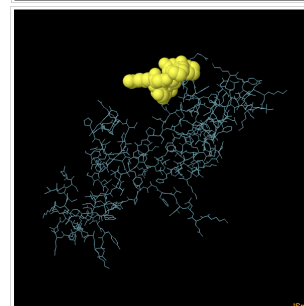

4 A:S697, A:A698, A:A702,  
A:K703, A:N704, A:D705,  
A:Q706, A:P707, A:L708,  
A:E709, A:D710, A:K713 12 0.829

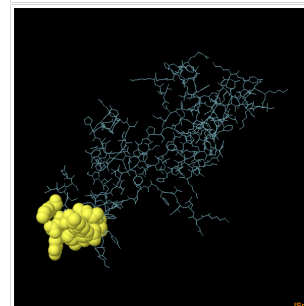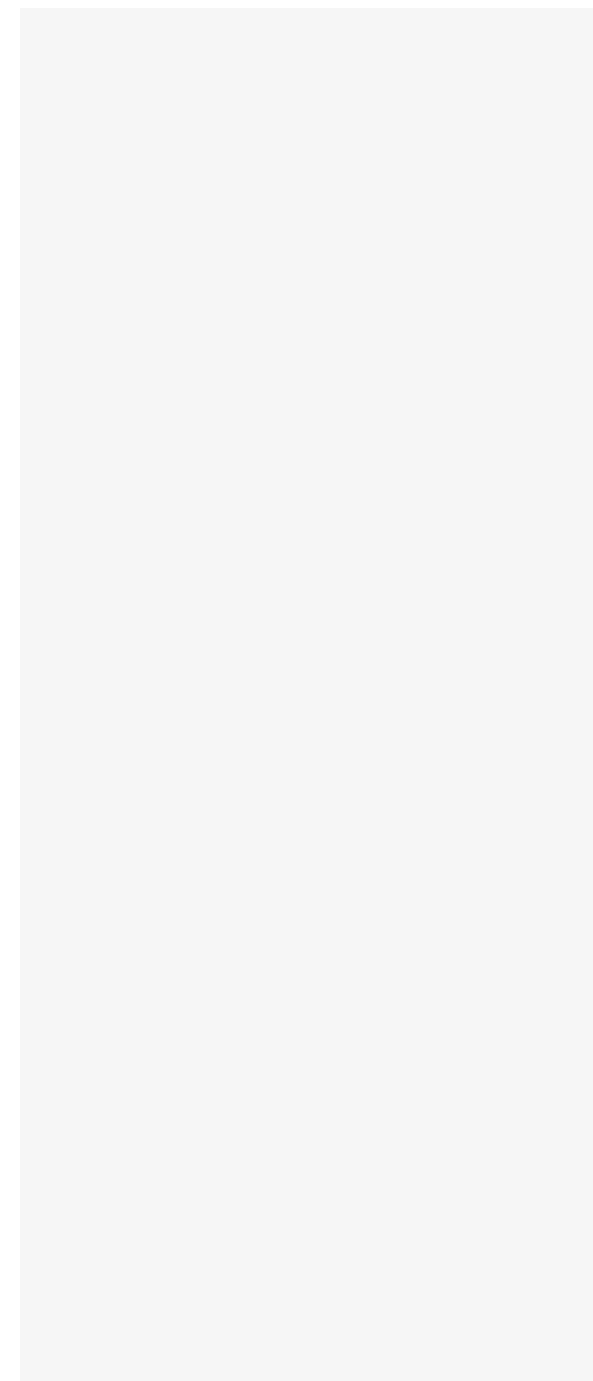

16 Mbov\_0580<sup>ab</sup> AFM51934\_1 1sta 24.44

1 A:T334, A:N335, A:K336,  
A:K337, A:K341 5 0.867

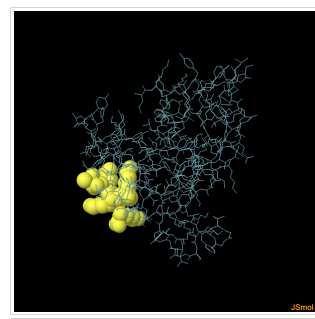

2 A:S258, A:D281, A:K282,  
A:Y283 4 0.863

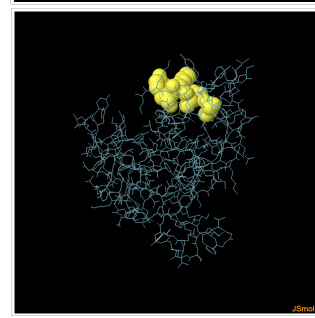

3 A:A321, A:L322, A:L323 3 0.841

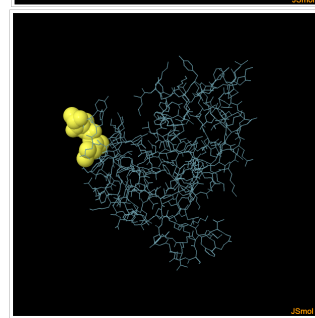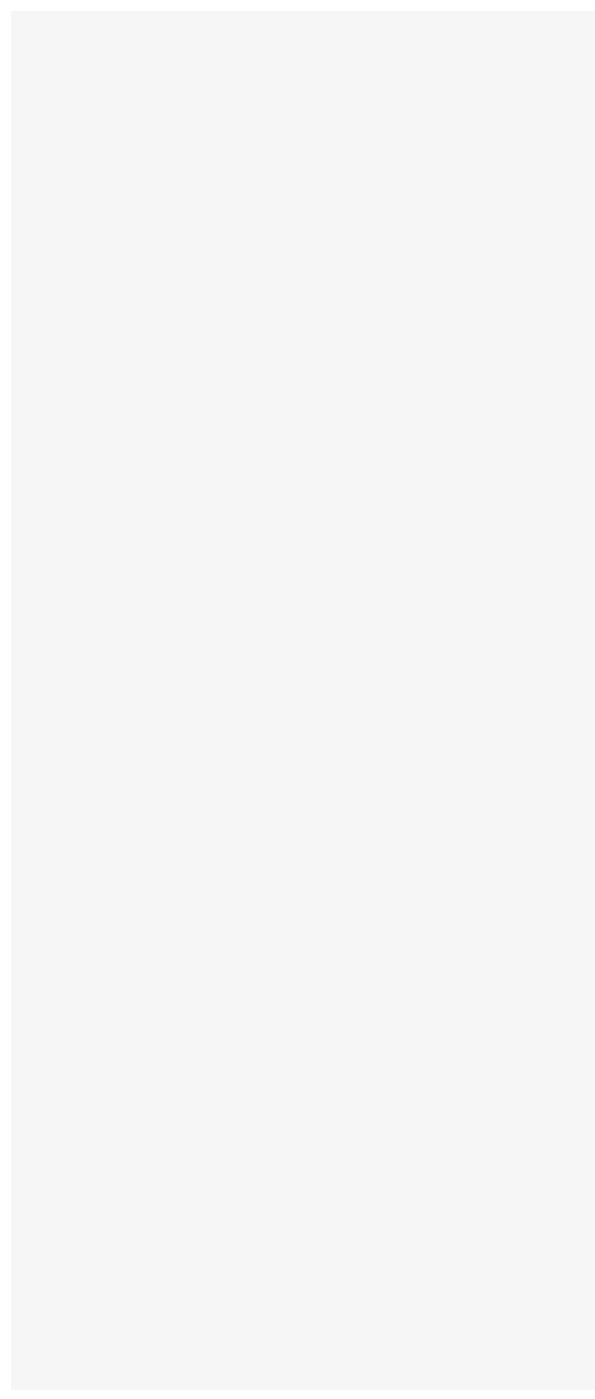

|    |                          |            |      |       |                                                                                         |                                                              |       |                                                                                     |                                                                                      |
|----|--------------------------|------------|------|-------|-----------------------------------------------------------------------------------------|--------------------------------------------------------------|-------|-------------------------------------------------------------------------------------|--------------------------------------------------------------------------------------|
|    |                          |            |      | 4     | A:K228, A:F229, A:V230,<br>A:G231, A:G232, A:I233,<br>A:K234, A:S235, A:S236,<br>A:N237 | 10                                                           | 0.841 | 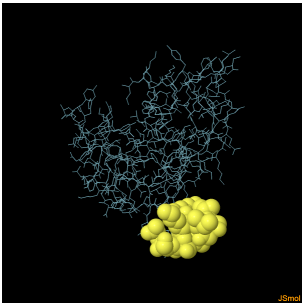 |                                                                                      |
|    |                          |            |      | 5     | A:F310, A:V311, A:K312                                                                  | 3                                                            | 0.809 |  |                                                                                      |
| 17 | Mbov_0585 <sup>a,b</sup> | AFM51939_1 | 5djn | 26.47 | 1                                                                                       | A:F498, A:M499, A:E500,<br>A:I502, A:N503, A:L504,<br>A:G505 | 7     | 0.893                                                                               |  |

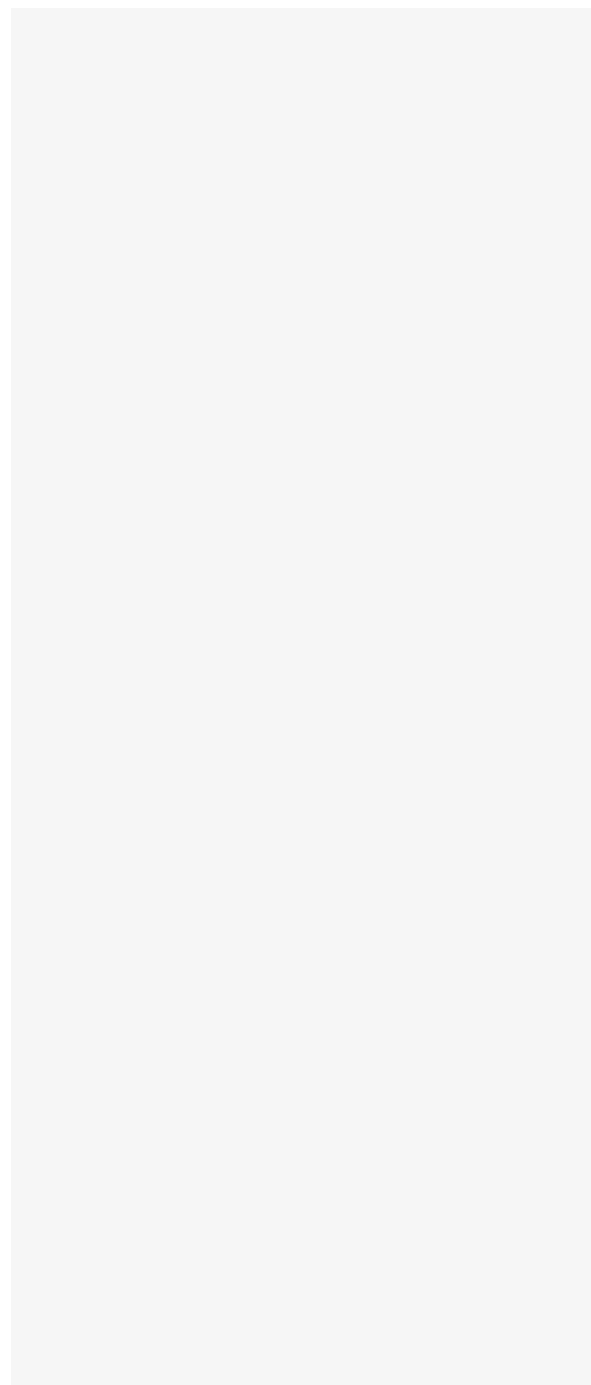



18 Mbov\_0658<sup>ab</sup> AFM52009\_1 4ql6

19.15

1 A:I482, A:L483, A:P484,  
A:T485, A:G486, A:D487,  
A:I488, A:I489, A:Q490 9 0.945

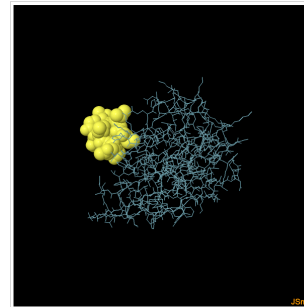

2 A:D350, A:G351, A:Q352,  
A:T353, A:K371, A:K374,  
A:E375, A:A376, A:S378,  
A:K379, A:G380, A:K382 12 0.864

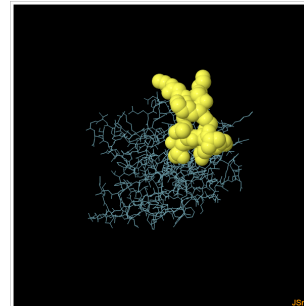

3 A:I536, A:N537, A:N538,  
A:I539, A:S540, A:K541 6 0.846

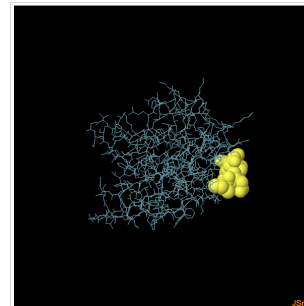

19 Mbov\_0674<sup>a,b</sup> AFM52024\_1 4awn 20.32

4 A:P445, A:D516, A:E517,  
A:N518, A:I519, A:E520,  
A:T521, A:G522, A:A523,  
A:K524, A:N525, A:L526

12 0.808

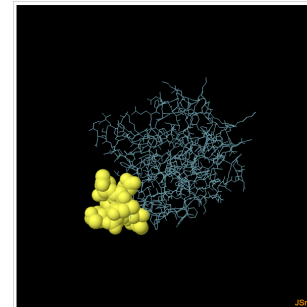

1 A:F375, A:Y377, A:K378,  
A:N379, A:I380, A:N381,  
A:S382, A:L383, A:N384,  
A:D385, A:W386, A:Y389,  
A:V390, A:K391, A:S392,  
A:S393, A:S394, A:S395,  
A:K396, A:K397, A:K399,  
A:S400, A:N401, A:S402,  
A:G403

25 0.892

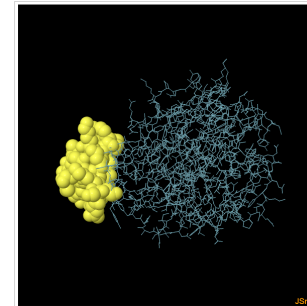

2 A:P209, A:E210, A:K212,  
A:E213, A:T214, A:P215,  
A:F216, A:G217, A:G218,  
A:S219, A:V220, A:E267,  
A:G268

13 0.847

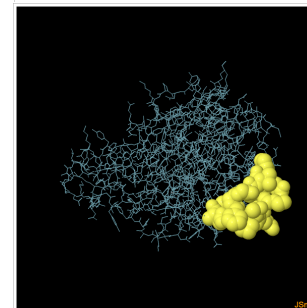

3      A:N148, A:E149, A:Q150,  
A:S151, A:Q152, A:I154,  
A:S155, A:S156, A:H157,  
A:D158      10    0.836

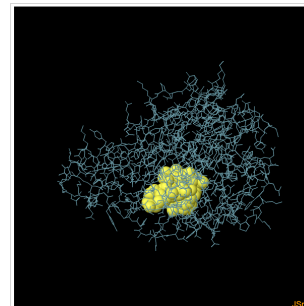

4      A:L235, A:D236, A:N237,  
A:S238, A:L239, A:K240,  
A:N242, A:S355, A:K356,  
A:L357      10    0.824

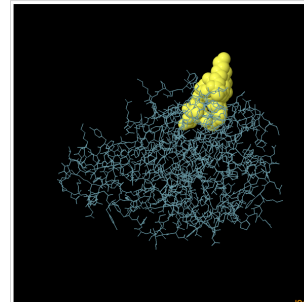

5      A:S106, A:K107, A:A108      3    0.819

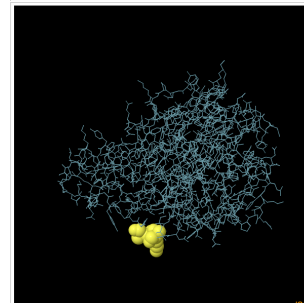

|    |                         |            |      |       |   |                                                                                                                                                                                                             |    |       |                                                                                      |
|----|-------------------------|------------|------|-------|---|-------------------------------------------------------------------------------------------------------------------------------------------------------------------------------------------------------------|----|-------|--------------------------------------------------------------------------------------|
| 20 | Mbov_0675 <sup>ab</sup> | AFM52025_1 | 5h7w | 30.97 | 1 | A:E441, A:E442, A:P447,<br>A:G448, A:N449, A:G450,<br>A:E451, A:R452, A:E453,<br>A:V454, A:P455, A:I456,<br>A:W457, A:R458, A:G459,<br>A:R460, A:A461, A:S549,<br>A:K550, A:K570, A:E571,<br>A:T572, A:K573 | 23 | 0.882 | 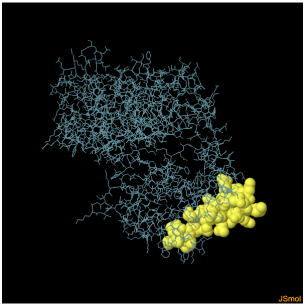  |
|    |                         |            |      |       | 2 | A:K358, A:V377, A:V378,<br>A:D379, A:K380, A:E381,<br>A:T382, A:G383, A:K384,<br>A:V385, A:T386, A:E387,<br>A:V388, A:K389                                                                                  | 14 | 0.862 |   |
|    |                         |            |      |       | 3 | A:W226, A:N227, A:D228,<br>A:K229, A:A230, A:V231,<br>A:A232, A:E233, A:K234,<br>A:V235, A:D239, A:G240,<br>A:K241, A:L242, A:A243,<br>A:V244, A:K245                                                       | 17 | 0.858 |  |

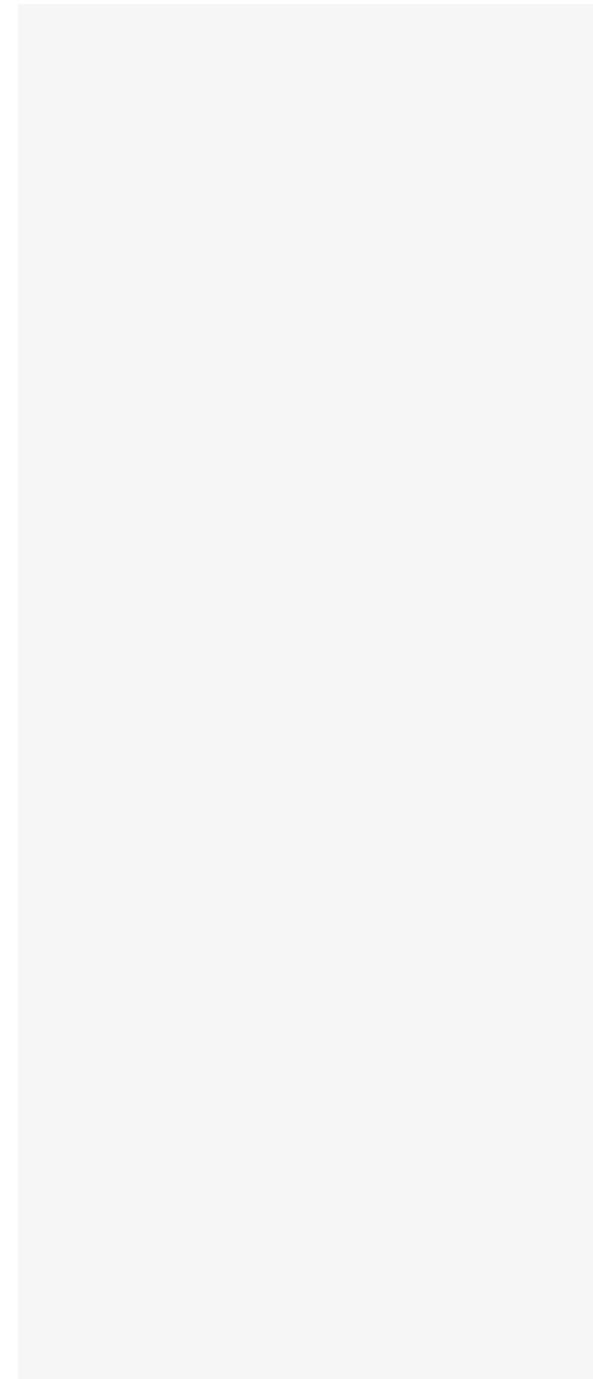

4 A:I408, A:A409, A:S410,  
A:D413 4 0.846

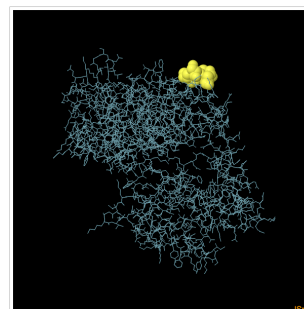

5 A:N562, A:V563, A:S564,  
A:A565, A:K566, A:I567,  
A:S568, A:Y569, A:D574,  
A:K576, A:F577, A:Y579,  
A:D582, A:S585, A:V586,  
A:M587, A:I588, A:N589,  
A:K591, A:K592, A:V593,  
A:E594, A:K597 23 0.838

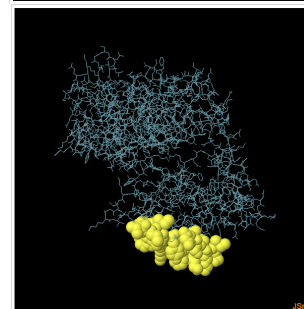

6 A:D350, A:I351, A:E352,  
A:D355, A:E357 5 0.812

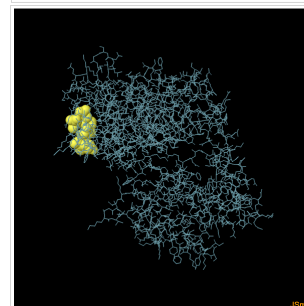

|    |                          |            |      |   |                                                                                                                                               |    |       |       |  |
|----|--------------------------|------------|------|---|-----------------------------------------------------------------------------------------------------------------------------------------------|----|-------|-------|--|
|    |                          |            |      |   |                                                                                                                                               |    |       |       |  |
|    |                          |            |      | 7 | A:A424, A:D427, A:K428,<br>A:V429, A:N432, A:P434,<br>A:I435, A:E436, A:F437,<br>A:K438, A:D509, A:T510,<br>A:Q511, A:S512, A:G513,<br>A:D514 | 16 | 0.802 |       |  |
|    |                          |            |      | 1 | A:S180, A:V181, A:Q182,<br>A:L183, A:N184, A:L185,<br>A:K186, A:V187, A:L188,<br>A:H189, A:K190                                               | 11 | 0.937 |       |  |
| 21 | Mbov_0739 <sup>a,b</sup> | AFM52087_1 | 4gqo |   |                                                                                                                                               |    |       | 17.56 |  |

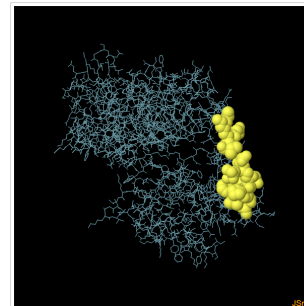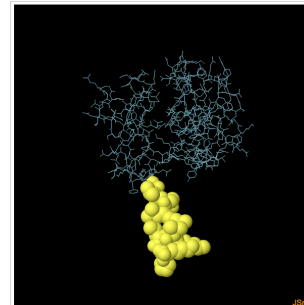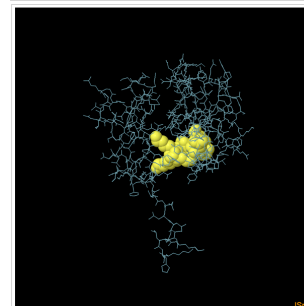

|  |  |  |  |   |                                                    |   |       |  |  |
|--|--|--|--|---|----------------------------------------------------|---|-------|--|--|
|  |  |  |  | 2 | A:N56, A:E58, A:K60, A:K61,<br>A:D62, A:K63, A:D64 | 7 | 0.867 |  |  |
|--|--|--|--|---|----------------------------------------------------|---|-------|--|--|

|    |                          |            |      |       |   |                                                                                                                                                                                                                                                                                                       |    |       |
|----|--------------------------|------------|------|-------|---|-------------------------------------------------------------------------------------------------------------------------------------------------------------------------------------------------------------------------------------------------------------------------------------------------------|----|-------|
|    |                          |            |      |       |   | <p>B:I212, B:E213, B:V214, B:Q215,<br/>B:S216, B:N217, B:S218, B:K219,<br/>B:V220, B:K221, B:V222,<br/>B:H223, B:E224, B:L225,<br/>B:V226, B:G227, B:T228, B:G229</p>                                                                                                                                 | 18 | 0.923 |
| 22 | Mbov_0743 <sup>a,b</sup> | AFM52091_1 | 4ci7 | 18.75 | 2 | <p>B:K326, B:K328, B:I330, B:I357,<br/>B:Y358, B:Q359, B:D360,<br/>B:G361, B:V362, B:D363,<br/>B:V364, B:S365, B:D366, B:Y367,<br/>B:F368, B:N369, B:I370, B:E371,<br/>B:Y372, B:V373, B:K374,<br/>B:N375, B:D376, B:G377,<br/>B:V378, B:I379</p>                                                     | 26 | 0.891 |
|    |                          |            |      |       | 3 | <p>A:K326, A:K328, A:I330,<br/>A:Y358, A:Q359, A:D360,<br/>A:G361, A:V362, A:D363,<br/>A:V364, A:S365, A:D366,<br/>A:Y367, A:F368, A:N369,<br/>A:I370, A:E371, A:Y372,<br/>A:V373, A:K374, A:N375,<br/>A:D376, A:G377, A:V378,<br/>A:I379, A:L395, A:F396,<br/>A:Y397, A:D398, A:Y399,<br/>A:E400</p> | 31 | 0.887 |

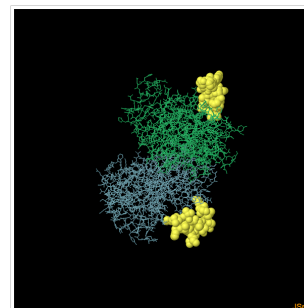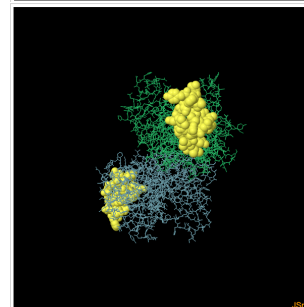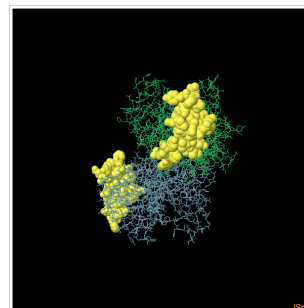

4 A:V214, A:Q215, A:S216,  
A:N217, A:S218, A:K219,  
A:V220, A:K221, A:V222,  
A:G227, A:T228, A:G229

12 0.884

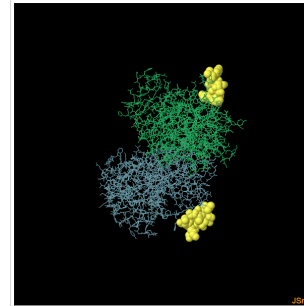

5 A:V144, A:P145, A:N146,  
A:K147, A:G148, A:A149,  
A:Y150

7 0.878

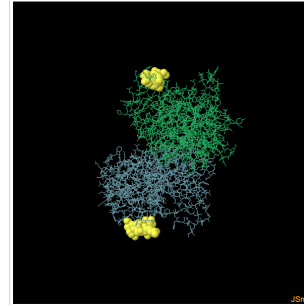

6 B:N315, B:G317, B:V318,  
B:S320, B:K321, B:N322, B:T323,  
B:A325

8 0.838

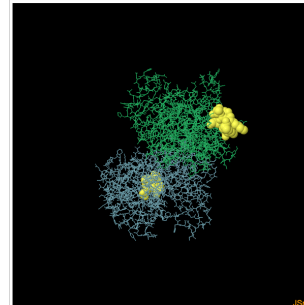



7 B:D140, B:L141, B:Y142,  
B:Y143, B:V144, B:P145,  
B:N146, B:K147, B:G148,  
B:A149, B:Y150, B:H151,  
B:N152, B:A153, B:L154,  
B:R155, B:N156, B:Y157,  
B:N159, B:T162, B:H163

21 0.836

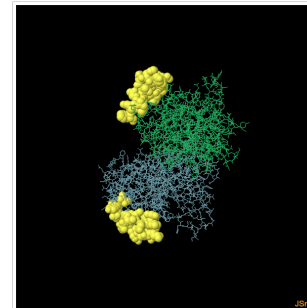

8 A:N315, A:G317, A:V318,  
A:S320, A:K321, A:N322,  
A:T323, A:A325

8 0.831

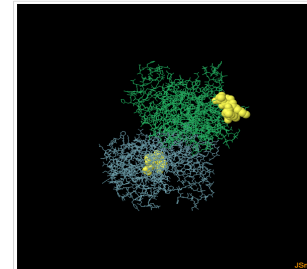

9 A:S333, A:T334, A:Q335

3 0.83

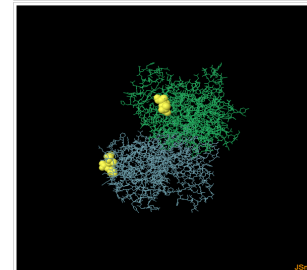

10 A:N152, A:A153, A:N156,  
A:Y157, A:N159, A:K160,  
A:Y161, A:K164 8 0.828

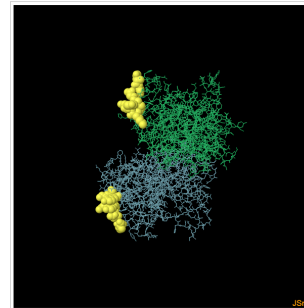

11 B:Y303, B:N332, B:S333, B:T334,  
B:Q335 5 0.814

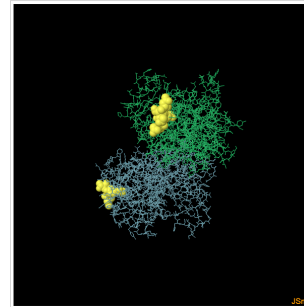

12 B:K394, B:Y397, B:D398 3 0.81

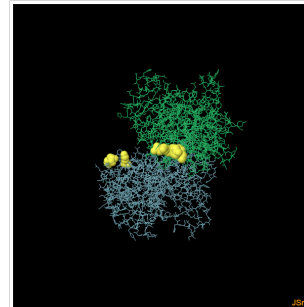

a: related to *M. bovis* HB0801-P1, b: related to P150 and a,b: related to both (*M. bovis* HB0801-P1, and P150).

**Formatted:** Line spacing: Double, Tab stops: Not at 12.89 cm
